# Supplementary material for: Comparative Transcriptomics Highlights New Features of the Iron Starvation Response in the Human Pathogen Candida glabrata
Source: Front Microbiol. 2018 Nov 16;9:2689. doi: 10.3389/fmicb.2018.02689 (PMC6250833; doi:10.3389/fmicb.2018.02689)
Supplement: Supplementary file 5 [file Table_5.XLSX]

## Sheet: supplementary table T5
	HTL/delta aft2 sel 1 mM 30 min	delta aft2/HTL sel 1 mM 30 min	HTL/delta AFT2 Cd 2 mM 30 min	delta aft2/HTL Cd 2 mM 30 min	HTL/delta AFT2 BPS 0.5 mM 30 min	delta AFT2/HTL BPS 0.5 mM 30 min	HTL/delta AFT2 YPD	delta AFT2/HTL YPD
CAGL0K08536g	2.87	-2.55	2.85	-2.44	0.78	-0.34	0.04	0.06
CAGL0G09042g	1.65	-1.47	2.15	-1.95	2.02	-2.21	2.97	-3.04
CAGL0B04675g	1.59	-1.78	2.85	-2.6	1.29	-1.16	0.25	-0.64
CAGL0B00990g	1.75	-1.68	1.54	-1.09	1.27	-1.15	0.68	-0.69
CAGL0G06798g	1.12	-1.1	2.44	-1.91	1.17	-0.69	0.22	-0.44
CAGL0J04048g	1.6	-1.22	1.57	-1.75	1.28	-0.81	0.26	-0.11
CAGL0F00715g	1.57	-1.6	1.95	-1.69	0.67	-0.56	0.38	-0.47
CAGL0E06006g	1.97	-1.3	1.51	-1.18	0.56	-0.27	0.16	-0.05
CAGL0A04675g	1.66	-1.12	1.37	-1.15	0.74	-0.6	0.31	-0.14
CAGL0G02255g	1.02	-1.06	1.36	-1.29	0.82	-0.65	0.05	-0.04
CAGL0M07942g	0.95	-0.8	1.76	-1.19	0.96	-0.44	0.35	-0.04
CAGL0L05742g	1.97	-1.24	1.32	-0.96	0.39	-0.14	0.23	0.02
CAGL0A03476g	0.72	-1.29	1.1	-1.07	0.69	-0.8	0.11	-0.2
CAGL0I07887g	1.02	-0.67	1.42	-1.22	0.75	-0.58	0.06	-0.27
CAGL0H03817g	1.2	-1.01	1.45	-1.2	0.42	-0.22	0.13	-0.06
CAGL0F01749g	2.54	-2.21	-0.14	0.15	0.32	-0.67	0.12	-0.39
CAGL0M14091g	1.18	-0.79	1.13	-1.17	0.62	-0.5	0.49	-0.6
CAGL0L01177g	1.21	-0.78	1.11	-1.16	0.5	-0.44	0.19	-0.13
CAGL0J02794g	0.95	-0.71	1.44	-0.98	0.62	-0.14	0.39	0.01
CAGL0G05269g	2.01	-1.55	0.79	-0.7	0.06	0.32	0.14	-0.19
CAGL0M11704g	0.76	-0.86	0.86	-0.66	0.87	-0.69	0.03	-0.46
CAGL0J04554g	1.11	-1.25	0.48	-0.23	0.72	-0.89	0.32	-0.81
CAGL0K06677g	1.51	-1.02	0.81	-0.83	0.33	-0.06	-0.01	0.05
CAGL0F08745g	1.54	-0.15	0.56	-0.73	1.62	0.05	0.6	0.26
CAGL0E04356g	0.8	-0.81	1.02	-0.71	0.84	-0.2	0.07	-0.03
CAGL0M04213g	0.31	-0.47	1.55	-1.1	0.79	-0.05	-0.01	0.22
CAGL0G02189g	1.73	-1.26	-0.14	0.01	0.63	-0.78	0.31	-0.61
CAGL0L00429g	1.61	-1.51	-0.23	0.07	0.29	-1.01	0.16	-0.78
CAGL0D04356g	1.24	-0.92	0.33	-0.17	0.91	-0.52	0.07	-0.52
CAGL0M11000g	1.28	-0.02	0.35	-0.34	1.97	0.06	0.65	-0.93
CAGL0I04708g	0.99	-0.75	0.58	-0.42	0.56	-0.54	0.17	-0.6
CAGL0C04741g	0.99	-0.64	0.75	-0.67	0.76	-0.01	0.02	0.09
CAGL0L11990g	0.88	-0.73	0.5	-0.4	0.66	-0.53	0.17	-0.23
CAGL0L01199g	0.94	-0.51	0.85	-0.73	0.3	-0.36	0.09	-0.1
CAGL0M12188g	1.36	-1.42	0.08	0.05	0.37	-0.41	0.04	-0.44
CAGL0D01562g	0.91	-1.1	0.45	-0.16	0.56	-0.36	0.01	-0.35
CAGL0I04444g	1.31	-1.18	-0.12	-0.04	0.48	-0.51	0.1	-0.44
CAGL0I07315g	0.59	-0.39	0.84	-0.83	0.31	-0.42	0.13	-0.18
CAGL0B02343g	0.76	-0.76	0.33	-0.41	0.45	-0.59	0.36	-0.44
CAGL0H07887g	1.33	-1.34	-0.05	-0.01	0.19	-0.44	0.15	-0.39
CAGL0K07678g	0.49	-0.6	1.06	-0.35	0.19	-0.54	-0.06	-0.11
CAGL0B02838g	1.18	-0.7	0.67	-0.45	0.18	-0.05	-0.04	-0.2
CAGL0M13717g	1.45	-0.95	0	-0.08	0.16	-0.55	0.09	-0.4
CAGL0B02794g	1.68	-1.44	-0.18	0.28	0.15	-0.37	0.09	-0.27
CAGL0J03080g	0.95	-0.1	0.07	-0.34	1.76	0.09	0.44	-0.12
CAGL0L05258g	1.16	-0.26	0.51	-0.7	0.49	0.03	0.14	0.03
CAGL0K10340g	1.14	-1	-0.06	0.08	0.38	-0.7	0.14	-0.54
CAGL0K08756g	0.26	-0.45	1.06	-0.77	0.49	-0.02	0.06	-0.17
CAGL0H00660g	1.42	-0.97	0.08	-0.25	0.07	-0.18	0	-0.13
CAGL0J08316g	1.11	-0.52	0.35	-0.25	0.4	-0.28	0.14	-0.36
CAGL0F07293g	0.9	-0.83	0.52	-0.69	-0.07	-0.02	0.04	0.03
CAGL0H00704g	0.96	-0.18	0.52	-0.57	0.27	-0.33	0.06	-0.32
CAGL0C01771g	0.49	-0.49	0.81	-0.41	0.34	-0.2	0.05	-0.04
CAGL0K08800g	1.24	-0.1	0.39	-0.53	0.15	-0.25	0.07	-0.25
CAGL0K04499g	1.14	-1.16	0.09	0.2	0.12	-0.33	0.04	-0.27
CAGL0I01100g	0.81	-0.24	0.42	-0.5	0.43	-0.22	-0.02	0.04
CAGL0K03459g	0.7	-0.13	0.89	-0.37	0.77	0.25	0.03	-0.13
CAGL0J09416g	0.61	-0.24	0.55	-0.57	0.44	-0.18	0.15	-0.21
CAGL0F04279g	0.87	-0.34	0.43	-0.48	0.45	0.02	0.12	0.14
CAGL0K10868g	1.35	-0.38	0.2	-0.4	0.18	-0.03	-0.07	-0.01
CAGL0F01111g	1.16	-0.31	0.49	-0.49	0.25	0.17	0.02	0.14
CAGL0K05813g	1.02	-0.42	0.29	-0.29	0.27	-0.22	0.38	-0.35
CAGL0H02101g	0.71	-0.13	0.22	-0.09	1.39	0.04	0.45	-0.58
CAGL0A02728g	0.05	0.16	0.94	-0.87	0.72	-0.07	0.12	-0.22
CAGL0B01419g	0.87	-0.16	0.38	-0.46	0.33	-0.21	0.14	-0.2
CAGL0K00913g	0.89	-0.76	0.02	0.09	0.33	-0.5	0.13	-0.45
CAGL0C02233g	0.96	-0.33	0.33	-0.54	0.28	0.07	0.02	-0.04
CAGL0I04290g	0.79	-0.49	0.59	-0.51	0.12	0.16	0.06	0.24
CAGL0L06138g	1.1	-0.83	0	0.14	0.03	-0.51	0.15	-0.51
CAGL0I04048g	0.3	-0.07	1.12	-0.5	0.37	0.06	-0.08	0.18
CAGL0I06050g	0.19	-0.53	-0.17	-0.27	1.46	-0.01	-0.5	-1.08
CAGL0M12837g	0.77	-0.81	0.1	0.16	0.25	-0.51	0.24	-0.52
CAGL0F07953g	0.69	-0.42	0.18	-0.53	0.36	-0.1	0.26	-0.06
CAGL0J03960g	0.66	-0.59	0.51	-0.27	0.19	-0.04	0.2	0.07
CAGL0M12551g	0.29	-0.09	0.8	-0.47	0.93	0.33	0.49	0.2
CAGL0C02365g	1.15	-0.22	0.47	-0.45	0.03	0.1	0.15	-0.06
CAGL0H08558g	0.48	-0.33	0.59	-0.52	0.15	-0.14	-0.02	0.04
CAGL0J09240g	0.72	-0.59	-0.02	-0.1	0.51	-0.3	0.1	-0.35
CAGL0K10956g	0.22	-0.05	0.93	-0.44	0.46	-0.05	0.22	-0.07
CAGL0K07205g	0.13	-0.02	0.78	-0.91	-0.01	-0.27	0.07	-0.52
CAGL0G08151g	0.21	-0.22	0.67	-0.74	0.37	0.13	0.02	0.11
CAGL0G04917g	0.38	-0.21	0.57	-0.48	0.27	-0.11	0.07	-0.02
CAGL0G07623g	0.15	-0.38	0.59	-0.32	0.38	-0.18	-0.04	-0.11
CAGL0F01221g	0.21	-0.09	0.67	-0.51	0.77	0.25	0.22	0.08
CAGL0I10010g	1.16	0.06	0.21	-0.32	0.33	-0.02	0.17	0.17
CAGL0E00803g	0.69	-0.16	0.18	-0.48	0.4	-0.05	0	-0.04
CAGL0H03091g	0.45	-0.2	0.68	-0.41	0.24	0.02	0.1	0.07
CAGL0L10362g	0.71	-0.39	0.26	-0.15	0.25	-0.2	0.03	-0.22
CAGL0J10494g	0.67	-0.16	0.39	-0.36	0.24	-0.13	-0.1	0.1
CAGL0B00836g	0.66	-0.44	0.19	-0.58	0.19	0.11	0.02	0.06
CAGL0A04829g	0.72	-0.37	0.07	-0.07	0.51	-0.21	0.18	-0.34
CAGL0H05665g	0.67	-0.25	0.34	-0.24	0.26	-0.18	0.23	-0.17
CAGL0G06424g	0.33	-0.19	0.54	-0.45	0.36	-0.06	0.07	0.05
CAGL0C01243g	0.8	-0.3	-0.19	0.11	0.52	-0.61	0.25	-0.67
CAGL0J07062g	0.39	-0.29	0.4	-0.37	0.23	-0.24	0.16	-0.08
CAGL0H06303g	0.44	-0.23	0.49	-0.51	0.05	-0.19	0.13	-0.09
CAGL0D06688g	0.6	-0.49	0.42	-0.06	0.22	-0.11	0.08	-0.15
CAGL0F06017g	0.35	-0.18	0.59	-0.34	0.49	0.06	0.14	-0.01
CAGL0B01875g	0.56	-0.1	0.15	0.03	1.12	0.01	0.57	0.08
CAGL0M07403g	0.38	-0.3	0.53	-0.53	0.05	-0.08	-0.07	0.02
CAGL0H03839g	0.21	-0.22	0.64	-0.3	0.45	-0.04	0.24	0.07
CAGL0J04202g	0.27	-0.09	0.31	-0.05	1.22	0.08	0.26	-0.45
CAGL0G03883g	1.1	-0.03	-0.04	-0.54	0.27	0.04	0.08	-0.01
CAGL0L06798g	0.37	-0.3	0.37	-0.17	0.6	-0.04	0.14	-0.1
CAGL0M10351g	0.44	-0.25	0.32	-0.34	0.25	-0.25	0.09	-0.16
CAGL0K05027g	0.75	-0.53	0.2	-0.06	0.17	-0.14	0.07	-0.1
CAGL0A03366g	0.74	-0.9	-0.13	0.12	0.13	-0.32	0.06	-0.2
CAGL0K04125g	0.17	0	0.49	-0.49	0.49	-0.2	0.23	-0.29
CAGL0K07315g	0.39	-0.43	0.42	-0.11	0.38	-0.09	0.23	-0.25
CAGL0E01705g	0.62	-0.43	0.37	-0.2	0.33	0.13	-0.04	0.08
CAGL0G07315g	0.33	0.08	0.55	-0.32	0.79	0.11	0.32	-0.1
CAGL0H05951g	0.91	-0.14	0.24	-0.24	0.18	-0.09	0.16	-0.04
CAGL0G09691g	0.57	-0.5	0.09	0.05	0.25	-0.44	0.2	-0.36
CAGL0I09284g	0.62	-0.81	0.1	0.21	0.4	-0.07	-0.02	-0.23
CAGL0F07117g	0.49	-0.14	0.43	-0.27	0.38	-0.08	0.11	-0.27
CAGL0B00902g	1.12	-0.44	-0.17	0.33	0.36	-0.37	0.09	-0.37
CAGL0F00737g	0.57	-0.56	0.23	-0.26	0.1	-0.06	-0.08	0.07
CAGL0M11902g	1.13	-0.2	0.05	-0.07	0.39	0.06	0.17	0.02
CAGL0M14047g	0.43	-0.49	0.13	-0.37	0.13	-0.22	0.23	-0.45
CAGL0C01595g	0.42	-0.16	0.1	-0.07	0.51	-0.5	0.21	-0.5
CAGL0D00176g	0.81	-0.67	0	0.32	0.32	-0.28	0.26	-0.17
CAGL0I05940g	0.03	-0.33	0.49	-0.41	0.35	-0.14	0.02	-0.1
CAGL0K04367g	0.79	-0.44	-0.09	-0.3	0.1	-0.21	0.03	-0.15
CAGL0K04719g	0.5	-0.13	0.15	-0.28	0.65	-0.03	0.14	-0.11
CAGL0M04675g	0.93	-0.03	0.34	-0.07	0.37	0.01	0.36	-0.13
CAGL0I09262g	0.12	-0.3	0.31	-0.28	0.67	-0.04	-0.1	-0.11
CAGL0E04004g	0.95	-0.2	0.02	-0.02	0.26	-0.27	0.15	-0.4
CAGL0C00693g	0.5	-0.37	0.49	-0.29	0.21	0.15	0.18	-0.03
CAGL0M11682g	0.8	-0.19	0.31	-0.4	0	0	0.02	-0.01
CAGL0K08184g	1.1	-0.24	0.08	-0.06	0.18	-0.04	0.02	-0.08
CAGL0K12254g	0.38	-0.21	0.3	-0.3	0.35	-0.16	0.16	-0.16
CAGL0L00605g	0.81	-0.2	0.03	-0.21	0.24	-0.21	0.03	-0.15
CAGL0D01606g	0.46	-0.4	0.22	0.04	0.34	-0.31	0.31	-0.43
CAGL0K05357g	0.31	-0.27	0.08	-0.02	0.32	-0.69	0.19	-0.21
CAGL0L03157g	0.02	-0.2	0.18	-0.06	0.67	-0.55	0.31	-0.43
CAGL0E05346g	0.19	-0.12	0.37	-0.35	0.51	-0.14	0.14	-0.04
CAGL0J01331g	0.66	-0.21	0.25	-0.26	0.45	0.16	0.37	0.04
CAGL0F02563g	0.76	-0.54	-0.13	-0.07	0.14	-0.29	0.15	-0.08
CAGL0D02046g	0.37	-0.05	0.39	-0.35	0.44	-0.06	0.29	-0.17
CAGL0H04873g	0.62	-0.33	0.32	-0.29	0.15	0.05	0.04	0.06
CAGL0B04213g	0.16	-0.04	0.11	-0.16	1.27	0.08	0.39	-0.07
CAGL0I01430g	-0.03	-1.12	0.11	-0.27	0.15	-0.03	0.44	0.41
CAGL0G04213g	0.12	-0.64	0.49	-0.42	0.09	0.11	-0.04	0.03
CAGL0L10186g	0.82	0	0	-0.26	0.36	-0.21	0.2	-0.26
CAGL0I04994g	0.65	-0.69	-0.21	0.35	0.4	-0.47	0.09	-0.49
CAGL0C04136g	0.46	-0.1	0.36	-0.31	0.32	-0.09	0.33	0.1
CAGL0F04697g	0.61	-0.06	0.25	-0.12	0.24	-0.36	0.26	-0.25
CAGL0L04664g	1.03	-0.36	0.18	-0.07	0.04	0.04	-0.04	0
CAGL0F03641g	0.53	-0.36	0.48	-0.18	0.2	0.13	0.17	0.03
CAGL0H02563g	0.95	0.15	0.46	0.11	0.8	0.34	0.96	-0.02
CAGL0J09262g	0.48	-0.03	0.27	-0.07	0.55	-0.2	0.23	-0.35
CAGL0C03069g	0.58	-0.32	0.23	-0.06	0.41	0	0.06	-0.12
CAGL0J07084g	0.21	-0.1	0.45	-0.07	0.41	-0.35	0.22	-0.38
CAGL0H03289g	0.52	-0.18	0.18	-0.23	0.17	-0.31	-0.04	-0.15
CAGL0A01193g	0.18	-0.07	0.6	-0.29	0.4	-0.04	-0.02	-0.17
CAGL0J04158g	0.56	-0.03	0.2	-0.34	0.33	-0.12	0.03	-0.08
CAGL0F02761g	0.36	-0.38	-0.14	-0.14	0.3	-0.54	0.03	-0.27
CAGL0I04328g	0.29	-0.03	0.33	-0.35	0.28	-0.3	0.61	-0.42
CAGL0M00902g	0.24	-0.25	0.43	-0.37	0.33	0.05	0.13	0
CAGL0A02002g	0.34	0.03	0.16	-0.24	0.75	-0.1	-0.1	-0.23
CAGL0H03707g	0.62	-0.05	0.34	-0.41	0.17	0.03	-0.01	-0.07
CAGL0J08635g	0.36	-0.02	0.28	-0.41	0.28	-0.2	0.15	-0.11
CAGL0K00759g	0.91	0.04	0.21	-0.58	-0.05	0.07	0	0
CAGL0F03091g	0.12	0.11	0.84	-0.24	0.52	0.08	0.29	0.13
CAGL0C02453g	-0.07	-0.09	0.55	-0.37	0.69	0.1	0.06	0.05
CAGL0F08987g	0.34	0.06	0.77	-0.33	0.22	0.08	0.33	-0.02
CAGL0I07557g	0.38	0.09	0.55	-0.37	0.22	-0.09	0.18	-0.12
CAGL0B03465g	0.59	-0.23	0.34	0.02	0.33	-0.05	-0.14	-0.02
CAGL0A04081g	1.11	-0.2	0.11	-0.08	0.22	0.21	0.03	0.12
CAGL0B01100g	0.14	-0.31	0.65	-0.23	0.43	0.25	-0.02	0.11
CAGL0J00165g	-0.18	-0.43	0.39	-0.38	0.52	0.03	NA	0.18
CAGL0J08976g	0.21	-0.03	0.57	-0.27	0.54	0.12	0.48	-0.1
CAGL0I06809g	0.26	0.03	0.34	-0.42	0.29	-0.22	0.1	-0.12
CAGL0D05148g	0.12	0.01	0.34	-0.41	0.47	-0.17	0.28	-0.09
CAGL0K00847g	0.19	-0.15	0.28	-0.27	0.38	-0.23	0.26	-0.3
CAGL0M08822g	0.85	-0.06	0.16	-0.11	0.29	-0.03	0.03	0.03
CAGL0C05555g	0.41	-0.23	0.07	-0.01	0.39	-0.39	0.22	-0.32
CAGL0J09944g	0.03	-0.1	-0.09	0.23	0.84	-0.85	0.67	-0.81
CAGL0H06809g	0.31	0.17	0.43	-0.49	0.34	-0.09	0.32	-0.05
CAGL0E06512g	0.33	-0.01	0.37	-0.19	0.38	-0.21	0.32	-0.26
CAGL0J09680g	0.68	-0.25	0.4	-0.11	0.27	0.23	0	0.1
CAGL0L04598g	0.4	-0.13	0.28	-0.06	0.64	0.03	0.1	-0.07
CAGL0K03201g	0.36	-0.06	0.4	-0.48	0.31	0.13	0.4	-0.08
CAGL0K01353g	0.16	-0.07	0.29	-0.32	0.51	-0.13	0.23	-0.23
CAGL0L00671g	0.63	-0.79	-0.04	0.25	0.1	-0.25	0.2	-0.33
CAGL0M00154g	0.66	-0.3	0.11	-0.35	-0.11	-0.17	0.07	-0.16
CAGL0M12595g	0.23	-0.04	0.25	-0.34	0.53	-0.08	0.1	-0.11
CAGL0L07656g	0.6	-0.16	0.05	-0.07	0.36	-0.23	0.05	-0.29
CAGL0M05995g	0.1	-0.23	0.36	-0.05	0.47	-0.26	0.22	-0.3
CAGL0C05115g	0.1	-0.2	-0.14	-0.13	1.23	0.05	-0.02	-0.05
CAGL0F04719g	0.46	-0.29	0.22	0.21	0.72	0.02	0.1	-0.15
CAGL0F00209g	0.39	-0.02	0.18	0.11	1.02	0.04	0.41	0.39
CAGL0K00803g	0.46	-0.76	0.4	0.36	0.18	0	0.03	0.01
CAGL0H06171g	0.13	-0.21	0.42	-0.24	0.27	-0.16	0.12	-0.02
CAGL0H08327g	0.18	-0.52	0.31	-0.18	0.29	0.05	0.49	0.36
CAGL0D04136g	0.27	-0.04	0.69	-0.12	0.51	0.21	0.24	0.16
CAGL0A01716g	0.26	-0.27	0.48	0.02	0.42	-0.01	0.03	0.03
CAGL0I01342g	0.13	-0.25	0.42	-0.41	0.17	-0.04	-0.19	-0.06
CAGL0M02211g	0.29	-0.26	0.24	-0.01	0.34	-0.27	0.11	-0.17
CAGL0G08063g	0.08	-0.09	0.31	-0.41	0.49	-0.03	-0.01	-0.02
CAGL0M09229g	0.28	-0.28	0.45	-0.11	0.35	0.07	0.19	0.01
CAGL0K01133g	0.06	-0.11	0.35	-0.32	0.5	-0.06	-0.03	-0.05
CAGL0K00869g	0.54	0.16	0.47	-0.3	0.25	0	0.36	-0.13
CAGL0M10505g	0.33	0.08	0.25	-0.35	0.32	-0.23	0.16	-0.29
CAGL0A04191g	0.03	-0.25	0.57	-0.28	0.38	0.11	-0.01	NA
CAGL0K02145g	0.02	-0.19	0.29	-0.5	0.14	-0.25	-0.05	-0.24
CAGL0H10032g	-0.03	-0.2	0.58	-0.14	0.53	0.03	0.03	0.01
CAGL0M14025g	0.24	-0.43	0.15	-0.07	0.32	-0.18	0.22	-0.25
CAGL0H10142g	0.58	0.01	0.14	-0.29	0.15	-0.24	0.07	-0.23
CAGL0A01111g	-0.02	0.02	0.66	-0.28	0.49	0.02	0.24	-0.13
CAGL0J04400g	0.08	-0.19	0.42	-0.31	0.28	-0.09	0.12	-0.17
CAGL0H08305g	0.27	-0.02	0.3	-0.33	0.39	-0.06	0.09	-0.1
CAGL0M13937g	0.37	0.1	0.11	-0.37	0.33	-0.29	0.09	-0.24
CAGL0K11682g	0.12	-0.05	0.65	-0.31	0.49	0.26	0.07	0.14
CAGL0A03146g	0.3	-0.01	0.37	-0.3	0.51	0.14	0.08	0.14
CAGL0I02904g	0.9	-0.13	0.19	-0.09	0.02	-0.02	0.07	0.01
CAGL0K06391g	0.19	-0.06	0.25	-0.25	0.41	-0.19	-0.04	-0.1
CAGL0B01122g	-0.24	-0.67	0.39	-0.4	0.11	-0.01	-0.16	0.04
CAGL0E00605g	0.14	-0.03	0.59	-0.34	0.43	0.19	0.11	0.1
CAGL0A04103g	0.38	-0.16	0.56	-0.1	0.38	0.24	0.22	0.11
CAGL0J05258g	0.06	0.01	0.76	-0.22	0.61	0.31	0.07	0.08
CAGL0M12474g	0.32	-0.13	0.38	-0.13	0.29	-0.08	0.12	-0.04
CAGL0B02860g	0.21	-0.26	0.23	-0.09	0.56	0.02	0.08	-0.08
CAGL0J02948g	0.3	-0.3	0.28	-0.05	0.3	-0.09	0.06	-0.19
CAGL0A02618g	0.17	-0.02	0.56	-0.3	0.47	0.2	0.25	0.15
CAGL0M05665g	0	0	0.45	-0.38	0.38	-0.11	0.59	-0.29
CAGL0I05742g	0.15	0.02	0.39	-0.34	0.28	-0.18	0.16	-0.1
CAGL0G01122g	0.33	0	0.53	-0.42	0.35	0.31	0.16	0.03
CAGL0H03113g	0.37	-0.17	0.32	-0.16	0.13	-0.17	-0.05	-0.08
CAGL0D06402g	0.41	-0.56	0.16	0.15	0.36	0.02	0.08	-0.06
CAGL0K05071g	0.32	-0.11	0.46	-0.19	0.38	0.15	0.05	0.2
CAGL0J02904g	0.39	-0.13	0.37	-0.14	0.44	0.16	0.09	0.02
CAGL0M02629g	0.6	-0.06	0.25	-0.29	0.2	0.09	0.07	0.14
CAGL0D05170g	0.17	-0.18	0.04	-0.17	0.27	-0.48	-0.06	-0.36
CAGL0M05907g	0.22	-0.25	0.32	-0.53	-0.11	-0.09	-0.06	-0.03
CAGL0G01738g	0.32	-0.39	0.08	-0.14	0.42	0.05	0.07	-0.25
CAGL0I00924g	0.27	-0.32	0.24	-0.16	0.19	-0.11	0.03	-0.09
CAGL0G07821g	0.14	0	0.52	-0.24	0.21	-0.18	0.15	-0.15
CAGL0M02101g	0.27	0.09	0.33	-0.29	0.51	0.02	0.14	0.03
CAGL0J02926g	0.17	-0.12	0.5	-0.42	0.52	0.45	0.04	-0.06
CAGL0K02827g	0.28	-0.02	0.25	-0.14	0.39	-0.2	0.08	-0.13
CAGL0H08283g	0.13	-0.76	0.23	0.06	0.23	0.01	0.11	0.05
CAGL0L00759g	0.28	-0.1	0.06	-0.05	0.69	-0.1	0.13	-0.14
CAGL0E06380g	0.51	-0.07	0.25	0.07	0.37	-0.15	-0.01	-0.13
CAGL0K08668g	0.24	-0.17	0.46	-0.32	0.12	0.04	0.11	-0.2
CAGL0G03971g	0.3	-0.15	0.34	-0.25	0.22	-0.01	0.03	-0.05
CAGL0C02827g	0.51	-0.01	0.31	-0.24	0.16	-0.04	0.12	-0.04
CAGL0E05214g	0.38	-0.2	0.2	-0.2	0.19	-0.1	0.09	0
CAGL0L12870g	-0.15	-0.71	0.21	-0.3	0.28	0.08	0.5	-0.09
CAGL0K12144g	0.91	0.05	0.02	-0.58	-0.11	0.08	0.11	0.03
CAGL0I04906g	0.48	-0.35	-0.2	-0.27	0.15	-0.22	0.13	-0.28
CAGL0L03630g	0.34	-0.07	0.36	-0.28	0.21	0	-0.04	-0.06
CAGL0K11572g	0.25	0.06	0.32	-0.36	0.44	0.05	-0.06	0.02
CAGL0C02167g	0.2	-0.02	0.31	-0.39	0.29	-0.05	-0.03	0
CAGL0M05643g	0.43	-0.09	0.55	-0.07	0.23	0.12	0.11	-0.03
CAGL0F07447g	0.13	0.06	0.34	-0.38	0.46	0	0.21	-0.03
CAGL0H04983g	0.75	-0.34	0.08	0.39	0.34	-0.13	0.21	-0.24
CAGL0M03377g	0.51	-0.38	0.02	0.23	0.47	-0.1	0.06	-0.08
CAGL0K00231g	0.38	-0.16	0.21	-0.08	0.24	-0.18	0.06	-0.19
CAGL0H07023g	-0.01	0.08	0.56	-0.2	0.51	-0.06	-0.03	0.01
CAGL0I10923g	0.42	-0.14	0.02	0.07	0.31	-0.42	0.22	-0.42
CAGL0K10824g	0.31	-0.21	0.2	-0.2	0.2	-0.12	-0.05	0.05
CAGL0M03399g	0.47	-0.07	0.19	-0.12	0.24	-0.15	0.03	-0.05
CAGL0L11132g	0.47	0.02	0.18	-0.38	0.16	-0.07	0.07	-0.05
CAGL0J11484g	0.34	-0.09	0.59	-0.37	0.06	0.23	0.02	0.16
CAGL0G06006g	0.54	-0.16	0.36	0.03	0.38	0.19	0.38	0.11
CAGL0A01650g	0.5	-0.07	-0.11	-0.11	0.31	-0.34	-0.01	-0.43
CAGL0C03311g	0.32	0	0.3	-0.29	0.24	-0.07	0.08	-0.06
CAGL0J04246g	0.03	-0.12	0.4	-0.3	0.26	-0.1	-0.03	-0.01
CAGL0C02321g	0.66	-0.04	0.27	0.05	0.18	-0.11	-0.16	0.17
CAGL0J05302g	0.47	-0.05	0.23	-0.15	0.26	-0.05	0.12	-0.1
CAGL0H05863g	-0.03	-0.14	0.47	-0.51	0.11	-0.01	0	0.08
CAGL0L06248g	0.11	0.07	0.29	-0.49	0.29	-0.1	0.02	-0.13
CAGL0K11440g	0.41	-0.09	0.13	-0.24	0.21	-0.13	0.39	0.12
CAGL0C01507g	0.28	-0.28	0.38	-0.24	0.16	0.14	0.04	0.01
CAGL0A03971g	-0.09	0.04	0.33	-0.47	0.28	-0.25	0.21	-0.22
CAGL0I06424g	0.31	-0.1	0.25	-0.26	0.25	-0.03	0.3	-0.12
CAGL0K01331g	0.47	-0.08	0.29	-0.25	0.15	0.04	0	0.02
CAGL0M09207g	0.31	-0.06	0.56	-0.04	0.45	0.23	0.28	0.13
CAGL0K10846g	-0.04	-0.13	0.59	-0.27	0.43	0.19	0.19	0.15
CAGL0M10417g	0.36	-0.02	0.35	-0.31	0.27	0.12	0.25	-0.07
CAGL0C00341g	0.15	0	0.35	-0.35	0.51	0.17	0.27	0.03
CAGL0L04422g	0.26	-0.06	0.31	-0.1	0.41	-0.05	0.22	-0.07
CAGL0H09856g	0.54	0.01	0.2	-0.23	0.23	0	0.49	0.16
CAGL0K11616g	0.6	-0.11	0.1	0.04	0.27	-0.15	0.15	-0.09
CAGL0D05082g	0.17	-0.25	0.2	-0.22	0.29	-0.05	-0.21	-0.05
CAGL0G07529g	-0.15	0.06	0.5	-0.42	0.36	-0.11	0.04	-0.03
CAGL0I10406g	0.27	0.06	0.2	-0.29	0.2	-0.28	0.25	-0.28
CAGL0J07106g	0.21	-0.05	0.14	-0.48	0.14	-0.16	0.11	-0.17
CAGL0F07029g	0.49	-0.28	0.12	0.08	0.36	-0.01	0	-0.07
CAGL0L13222g	0.44	-0.07	0.44	-0.11	0.28	0.17	0.13	0.09
CAGL0E05984g	0.59	-0.49	0	-0.03	0.08	0.02	-0.11	0.18
CAGL0M12705g	0.23	0.04	0.49	-0.09	0.32	-0.08	0.2	0.02
CAGL0A02948g	0.29	0.03	0.41	-0.24	0.21	-0.05	0.26	-0.09
CAGL0D06154g	0.28	-0.09	0.33	-0.1	0.38	0.01	0.24	-0.02
CAGL0K01661g	0.37	-0.21	-0.09	-0.04	0.2	-0.44	-0.03	-0.35
CAGL0B03817g	0.41	-0.08	0.37	-0.06	0.36	0.11	0.13	0.1
CAGL0K01947g	0.11	0.06	0.56	-0.28	0.37	0.1	0.17	0.2
CAGL0H03157g	0.19	0.11	0.54	-0.23	0.27	-0.04	0.47	-0.13
CAGL0L06732g	0.31	0.04	0.35	-0.22	0.24	-0.08	-0.05	-0.06
CAGL0E00935g	0.08	-0.05	0.33	-0.45	0.46	0.21	-0.13	0.08
CAGL0C04114g	0.33	-0.25	0.18	-0.21	0.1	-0.09	0.23	0.05
CAGL0E03520g	0.26	-0.07	0.47	-0.09	0.36	0.09	0.08	0.06
CAGL0M07161g	-0.02	0.01	0.35	-0.43	0.4	-0.01	0.37	-0.07
CAGL0I08591g	0.51	-0.13	0.2	-0.15	0.24	0.07	0	0.03
CAGL0D00198g	0.42	-0.17	0.12	0.11	0.49	-0.07	0.2	-0.22
CAGL0A04499g	-0.16	-0.07	0.77	-0.63	0.06	0.22	0.03	0.1
CAGL0A02574g	-0.02	-0.05	0.59	-0.17	0.54	0.18	0.09	0.01
CAGL0F07491g	-0.02	-0.17	0.32	-0.36	0.22	-0.1	0.31	-0.18
CAGL0H07007g	0.08	-0.07	0.23	-0.33	0.37	-0.07	0	0.04
CAGL0M06633g	-0.03	-0.1	0.64	-0.11	0.37	0.04	0.26	-0.07
CAGL0J08162g	0.23	-0.34	0.46	-0.16	0.17	0.21	0.02	0.09
CAGL0G02277g	0.18	-0.09	0.27	-0.23	0.18	-0.2	-0.2	-0.02
CAGL0L00649g	0.52	-0.25	0.25	0.13	0.35	0.09	0	0.07
CAGL0M11242g	0.16	-0.11	0.25	-0.14	0.33	-0.16	0.23	-0.12
CAGL0J05126g	0.3	-0.11	0.2	-0.2	0.22	-0.11	0.11	-0.12
CAGL0J02992g	0.12	-0.3	0.12	-0.17	0.24	-0.19	0.02	-0.08
CAGL0I07837g	0.34	-0.01	0.61	-0.02	0.5	0.34	0.38	0.03
CAGL0H01881g	0.09	-0.01	0.54	-0.23	0.51	0.24	0.25	0.15
CAGL0K01199g	0.28	0.02	0.49	-0.18	0.29	0.08	0.14	0.09
CAGL0G09537g	0.12	0.1	0.37	-0.32	0.38	-0.05	0.15	-0.1
CAGL0F04807g	0.32	-0.13	0.2	-0.08	0.41	0	0	-0.04
CAGL0J08118g	0.29	-0.05	0.15	-0.26	0.21	-0.18	0.09	-0.1
CAGL0J08074g	0.17	-0.25	0.17	-0.34	0.07	-0.13	0.04	-0.03
CAGL0H06435g	0.1	-0.03	0.46	-0.33	0.21	0	0.11	-0.02
CAGL0M04983g	-0.05	-0.05	0.16	-0.5	0.36	-0.11	-0.01	-0.09
CAGL0J04092g	0.42	0.05	0.39	-0.33	0.15	0.11	0.07	0.13
CAGL0M01364g	0.11	0.09	0.3	-0.35	0.38	-0.08	0.09	-0.07
CAGL0L12562g	0.3	-0.01	0.25	-0.38	0.3	0.11	0.11	0.11
CAGL0K01727g	0.46	-0.1	0.23	-0.23	0.19	0.08	-0.08	0.03
CAGL0M14003g	0.14	0.04	0.23	-0.34	0.29	-0.17	0.15	-0.1
CAGL0L05456g	0.34	-0.29	0.22	-0.12	0.27	0.11	0.02	0.09
CAGL0D03058g	0.11	0.04	0.11	-0.41	0.3	-0.24	-0.04	-0.12
CAGL0G08217g	0.12	-0.24	0.72	-0.11	0.33	0.4	0.15	0.13
CAGL0B00814g	0.23	-0.04	0.32	-0.13	0.31	-0.09	0.17	-0.09
CAGL0L07788g	0.11	0.03	0.24	-0.29	0.18	-0.33	0.07	-0.2
CAGL0M14069g	0.16	-0.06	0.16	-0.26	0.22	-0.26	0.2	-0.34
CAGL0L08800g	0.16	0.07	0.36	-0.27	0.24	-0.16	0.15	-0.11
CAGL0G01881g	0.07	0.01	0.61	-0.14	0.37	0.07	0.17	0.01
CAGL0H08547g	-0.04	-0.02	0.59	-0.15	0.55	0.16	0.51	0.17
CAGL0M13739g	0.21	-0.18	0.29	-0.36	-0.04	-0.11	-0.03	-0.01
CAGL0F05225g	0.14	-0.13	0.28	-0.17	0.31	-0.08	0.2	-0.13
CAGL0D05318g	0.16	0	0.28	-0.16	0.34	-0.17	0.18	-0.1
CAGL0I00264g	0	0.05	0.3	-0.42	0.3	-0.14	0.24	-0.14
CAGL0E02739g	0.17	-0.19	0.29	-0.22	0.38	0.14	-0.02	0.12
CAGL0F04477g	0.25	0.12	0.26	-0.31	0.22	-0.19	0.17	-0.18
CAGL0D01496g	0.54	0.06	0.22	-0.25	0.26	0.1	0.23	0.04
CAGL0L08338g	0.22	-0.09	0.04	-0.16	0.21	-0.39	0.06	-0.31
CAGL0E04906g	0.33	-0.13	0.45	-0.15	0.33	0.29	0.06	0.24
CAGL0M07986g	0.19	0	0.35	-0.21	0.32	-0.03	0.2	-0.03
CAGL0K05401g	0.25	0.01	0.31	-0.19	0.28	-0.08	0.13	-0.01
CAGL0H03971g	0.2	-0.35	0.24	0.03	0.25	-0.09	0.1	-0.07
CAGL0F06325g	0.46	-0.06	0.22	-0.08	0.23	-0.05	-0.06	-0.04
CAGL0G05357g	0.44	-0.12	0.15	-0.01	0.33	-0.05	0.22	-0.15
CAGL0J09812g	0.34	-0.26	0.14	0.05	0.41	0	-0.04	-0.07
CAGL0D02150g	-0.01	0.07	0.57	-0.37	0.33	0.09	0.36	0.05
CAGL0J00935g	0.04	0.06	0.45	-0.29	0.46	0.08	0.14	0
CAGL0C04697g	0.18	-0.08	0.44	-0.09	0.42	0.11	0.02	0.03
CAGL0E05654g	0.18	-0.09	0.19	0.01	0.5	-0.15	0.02	-0.07
CAGL0I01320g	0.33	-0.16	0.18	-0.18	0.25	0	0.26	-0.11
CAGL0J06402g	0.64	-0.53	-0.09	-0.19	-0.11	0.06	-0.22	0.01
CAGL0M01342g	0.24	0	0.35	-0.18	0.29	-0.03	0.08	0.04
CAGL0C01815g	0.22	-0.11	0.34	-0.19	0.34	0.11	0.04	0.11
CAGL0H03729g	0.32	-0.13	0.3	-0.15	0.26	0.07	0.03	0.1
CAGL0C04411g	0.26	-0.04	0.18	-0.29	0.28	-0.04	0.51	0.15
CAGL0E03498g	0.31	0.06	0.6	-0.08	0.41	0.25	0.22	0.22
CAGL0K09372g	0.6	-0.25	0.07	-0.03	0.09	-0.04	-0.08	0.21
CAGL0G08228g	0.05	-0.01	0.51	-0.23	0.46	0.18	0.11	0.15
CAGL0K01287g	0.02	-0.25	0.37	-0.23	0.25	0.04	0.1	0
CAGL0F08085g	0.38	-0.06	0.33	-0.11	0.26	0.06	0.08	0.01
CAGL0L12298g	0.22	-0.01	0.32	-0.19	0.36	0.02	0.06	-0.01
CAGL0L01067g	0.27	-0.02	0.24	-0.38	0.04	-0.13	0.06	-0.16
CAGL0C00649g	0.05	-0.3	0.22	-0.11	0.32	-0.08	0.06	-0.08
CAGL0C00451g	0.17	-0.06	0.3	-0.12	0.35	-0.07	0.36	-0.15
CAGL0K01375g	0.22	-0.01	0.3	-0.17	0.2	-0.17	0.15	-0.2
CAGL0F04653g	0.1	0	0.29	-0.17	0.37	-0.14	0.13	-0.1
CAGL0K01309g	0.2	-0.05	0.24	-0.29	0.33	0.04	0.02	0.05
CAGL0B04411g	0.29	0.15	0.42	-0.23	0.33	0.05	0.33	-0.07
CAGL0L02717g	0.39	-0.16	0.23	0.03	0.18	-0.13	0.26	-0.2
CAGL0L01925g	0.28	-0.23	0.22	0.13	0.45	-0.01	0.01	-0.11
CAGL0E02937g	-0.11	-0.26	0.19	-0.42	0.24	-0.06	0.16	0.02
CAGL0J01441g	0.27	-0.27	0.13	0.04	0.42	-0.01	0.14	-0.07
CAGL0L06094g	0.7	-0.35	-0.12	0.06	0.28	0.09	0.23	0.09
CAGL0H01611g	0.16	-0.24	0.66	0.01	0.24	0.24	0.36	NA
CAGL0I08635g	-0.06	0.03	0.42	-0.47	0.28	0.03	0.08	-0.11
CAGL0H01859g	0.13	-0.05	0.38	-0.23	0.47	0.21	0.29	0.19
CAGL0E01177g	0.05	-0.17	0.34	-0.35	0.09	-0.05	0.22	-0.01
CAGL0G06094g	0.33	0.19	0.31	-0.32	0.27	-0.01	0.41	-0.22
CAGL0K03267g	0.27	-0.05	0.29	-0.17	0.22	-0.05	-0.09	0.01
CAGL0M06677g	0.11	0.03	0.29	-0.17	0.29	-0.22	0.35	-0.06
CAGL0E01771g	0.33	0	0.27	-0.12	0.12	-0.21	0.04	-0.08
CAGL0H10362g	0.21	-0.08	0.14	-0.2	0.38	-0.04	0.12	-0.1
CAGL0I04400g	0.16	0	0.11	-0.33	0.15	-0.3	0.17	-0.3
CAGL0D01936g	0.29	-0.07	-0.05	-0.4	0.23	-0.11	-0.03	0
CAGL0G00946g	0.16	0.05	0.48	-0.29	0.24	0.07	0.13	-0.01
CAGL0H08844g	-0.08	-0.49	0.31	0.01	0.42	0.08	0.06	0.01
CAGL0F03113g	0.27	-0.07	0.32	-0.19	0.25	0.06	0	0.04
CAGL0E01045g	0.1	0.1	0.32	-0.44	0.34	0.06	0.19	0.03
CAGL0E03916g	0.25	-0.01	-0.01	0.21	1.12	0.12	0.16	0.03
CAGL0M10549g	-0.01	0.02	0.51	-0.22	0.41	0.07	0.09	0
CAGL0L06666g	0.17	-0.09	0.18	-0.08	0.57	0.05	0.03	-0.04
CAGL0J04620g	0.11	0.16	0.38	-0.32	0.44	0.06	0.64	-0.12
CAGL0D00704g	0.01	-0.01	0.32	-0.22	0.48	0.01	-0.21	0.06
CAGL0I03850g	0.01	0.03	0.3	-0.38	0.33	-0.04	0.19	-0.08
CAGL0M13255g	0.26	0.03	0.29	-0.11	0.32	-0.08	0.15	-0.15
CAGL0H04939g	0.19	0.09	0.22	0.02	1	0.27	0.44	0.08
CAGL0H00418g	0.2	-0.04	0.15	-0.51	0.06	-0.07	-0.12	-0.02
CAGL0I00814g	-0.23	-0.73	0.1	-0.24	0.46	0.27	0.88	0.25
CAGL0K09900g	0.15	0.05	0.28	-0.31	0.48	0.14	0.19	0.05
CAGL0M13277g	0.02	-0.12	0.19	-0.29	0.24	-0.17	0.23	-0.21
CAGL0J05830g	0.3	-0.03	0.3	-0.07	0.39	0.07	0.13	0.09
CAGL0J00825g	0.23	-0.21	0.5	-0.04	0.23	0.19	-0.01	0.12
CAGL0L12826g	0.17	0.08	0.35	-0.23	0.25	-0.1	0.15	-0.08
CAGL0M07381g	0.05	-0.05	0.34	-0.26	0.3	-0.02	0.1	-0.06
CAGL0F03729g	0.06	0.02	0.34	-0.23	0.34	-0.07	0.02	-0.03
CAGL0C04499g	0.16	0.09	0.31	-0.29	0.23	-0.12	0.16	0.04
CAGL0H06743g	0.23	-0.09	0.3	-0.1	0.38	0.08	0.09	-0.03
CAGL0J04224g	0.48	-0.12	0.23	0.01	0.32	0.12	-0.02	0.11
CAGL0H03861g	0.19	0.06	0.22	-0.3	0.26	-0.11	0.04	-0.07
CAGL0E03850g	0.4	-0.17	0.21	-0.1	0.23	0.09	0.29	0.01
CAGL0H06105g	0.13	-0.03	0.12	-0.34	0.23	-0.17	-0.08	-0.13
CAGL0L06600g	0.28	-0.04	0.33	-0.08	0.36	0.07	0.23	-0.01
CAGL0L02497g	0.33	-0.6	0.08	0.04	0.16	0.12	0.19	0.33
CAGL0H09306g	0.09	-0.11	0.58	0.01	0.3	0.06	0.35	-0.06
CAGL0B02882g	0.12	-0.07	0.33	-0.2	0.31	0.02	0.28	-0.05
CAGL0D02266g	0.32	-0.11	0.22	-0.1	0.17	-0.09	0.06	0.03
CAGL0E05192g	0.28	-0.16	0.21	-0.13	0.21	-0.02	0.16	-0.06
CAGL0L00803g	0.37	-0.08	0.14	-0.07	0.37	0.03	0.01	0.02
CAGL0B03899g	0.06	0.1	0.59	-0.27	0.28	0.1	0.28	0.11
CAGL0K08734g	0.21	-0.09	0.39	-0.09	0.35	0.13	0.05	0.14
CAGL0M05951g	0.26	-0.03	0.37	-0.1	0.32	0.08	0.11	-0.04
CAGL0B01589g	0.11	0.02	0.36	-0.34	0.16	-0.05	0.32	-0.12
CAGL0D04048g	0.03	0.07	0.28	-0.33	0.15	-0.28	-0.01	-0.17
CAGL0D01958g	0.44	-0.11	0.22	-0.01	0.22	0	0.09	-0.1
CAGL0K10516g	0.1	-0.18	0.16	-0.14	0.25	-0.17	0.14	-0.3
CAGL0G08932g	0.21	-0.01	0.16	-0.24	0.2	-0.18	0	-0.15
CAGL0K10890g	0.91	-0.22	0.15	0.03	-0.04	0.21	-0.02	0.19
CAGL0I09482g	0.38	-0.03	0.15	-0.1	0.21	-0.13	0.08	-0.07
CAGL0H02739g	0.67	-0.08	0.03	-0.05	0.09	-0.08	0.08	-0.08
CAGL0L01859g	0.7	-0.1	-0.08	-0.02	0.1	-0.16	0.08	-0.13
CAGL0M07139g	0.19	-0.02	0.39	-0.2	0.23	0.04	0.18	0.03
CAGL0D05302g	-0.06	-0.05	0.36	-0.28	0.4	0.04	0.09	0.03
CAGL0F02255g	0.29	0.1	0.25	-0.33	0.13	-0.09	0.13	-0.01
CAGL0H00264g	0.42	-0.04	0.16	-0.16	0.15	-0.06	0.26	-0.1
CAGL0L05280g	0.4	-0.07	0.15	-0.11	0.22	-0.04	0	-0.01
CAGL0M04763g	0.24	-0.01	0.15	0.08	0.49	-0.18	0.13	-0.17
CAGL0B00946g	0.22	-0.11	0.11	-0.21	0.23	-0.11	-0.04	0
CAGL0L09933g	0.14	0.09	0.1	-0.29	0.35	-0.2	-0.05	-0.15
CAGL0G02849g	0.42	-0.23	0.07	0.16	0.64	0.21	0.13	-0.08
CAGL0E03201g	0.63	-0.37	-0.11	0.01	-0.29	-0.4	0.05	-0.47
CAGL0L05720g	0.65	-0.4	0.15	-0.05	-0.14	0.12	0.09	0
CAGL0M10593g	0.16	-0.11	0.41	-0.18	0.2	0.07	0.12	0.03
CAGL0F08701g	0.04	-0.06	0.36	-0.29	0.33	0.1	-0.12	0.04
CAGL0H01353g	0.14	-0.06	0.34	-0.16	0.45	0.17	0.08	0.1
CAGL0A03080g	0.42	-0.07	0.31	-0.05	0.22	0.09	0.03	0.09
CAGL0I02178g	0.25	-0.01	0.17	-0.17	0.28	-0.1	0.08	-0.05
CAGL0M07073g	0.03	-0.09	0.47	-0.23	0.36	0.2	0.05	0.16
CAGL0C03113g	0.22	0.21	0.38	-0.16	0.41	-0.02	0.13	-0.06
CAGL0H05819g	0.23	-0.05	0.22	-0.24	0.13	-0.11	0.06	-0.11
CAGL0M11104g	0.25	0.43	0.22	-0.32	0.37	-0.25	0.73	-0.32
CAGL0E02761g	0.11	-0.03	0.36	-0.31	0.31	0.15	0.01	0.07
CAGL0J09152g	0.16	0.13	0.28	-0.32	0.2	-0.14	0.26	-0.16
CAGL0M08338g	0.32	0.1	0.26	-0.07	0.14	-0.28	0.11	-0.17
CAGL0L08426g	0.19	0	0.26	-0.14	0.5	0.12	0.05	0.03
CAGL0H02343g	0.25	0.05	0.23	-0.24	0.14	-0.16	-0.13	-0.09
CAGL0J00803g	0.28	-0.12	0.17	-0.14	0.26	0	0.01	-0.01
CAGL0B01078g	0.42	-0.1	0.13	-0.03	0.27	-0.02	-0.03	-0.05
CAGL0M11236g	0.07	0.08	0.66	-0.2	0.18	0.06	0.14	0.03
CAGL0I09306g	0.05	0.03	0.5	-0.37	0.29	0.21	0.17	0.16
CAGL0K11594g	0.32	0.08	0.44	-0.08	0.31	0.1	0.12	0.12
CAGL0C05335g	0.12	-0.02	0.37	-0.23	0.27	0.04	0.01	0.02
CAGL0L00781g	0.26	-0.05	0.32	-0.21	0.13	0	0.06	0.02
CAGL0J01001g	0.37	-0.05	0.24	-0.14	0.17	0	0.08	0.04
CAGL0I01276g	0.56	-0.21	0.04	0.01	0.19	0.02	-0.01	-0.02
CAGL0D03806g	0.06	0.01	0.51	-0.11	0.24	-0.05	0.16	0.02
CAGL0I00528g	0.2	0.09	0.36	-0.39	0.09	-0.01	0.07	-0.11
CAGL0G09361g	0.14	-0.05	0.34	-0.16	0.31	0.04	0.1	0.04
CAGL0D03102g	0.25	0.13	0.32	-0.17	0.33	-0.02	0.21	-0.04
CAGL0I04004g	0.37	0	0.29	-0.17	0.16	0.03	0.03	-0.12
CAGL0G07601g	0.44	-0.27	0.27	0.01	0.07	0.08	-0.01	0.15
CAGL0I07139g	0.18	-0.12	0.21	-0.1	0.37	0.02	-0.01	-0.06
CAGL0F01243g	0.4	-0.09	0.2	-0.14	0.11	-0.02	-0.03	-0.01
CAGL0L06820g	0.3	-0.1	0.18	-0.08	0.25	-0.05	-0.02	0
CAGL0J10318g	0.24	-0.13	0.16	-0.22	0.18	-0.03	-0.07	0.01
CAGL0J05940g	0.18	-0.13	0.11	-0.2	0.17	-0.17	0.03	-0.14
CAGL0A02706g	0.14	0.01	0.54	-0.38	0.4	0.5	0.05	0.24
CAGL0G08195g	0.25	-0.15	0.31	-0.15	0.2	0.11	0.01	0.11
CAGL0I05258g	0.28	0.01	0.17	-0.16	0.22	-0.13	0.12	-0.11
CAGL0L06374g	0.12	0.14	0.42	-0.41	0.04	-0.1	0.21	-0.07
CAGL0I03938g	0.24	-0.07	0.2	-0.15	0.29	0	0.02	0.03
CAGL0H04323g	0.21	-0.03	0.16	-0.3	0.06	-0.19	0.04	-0.16
CAGL0J05962g	0.43	0.01	0.1	-0.26	0.1	-0.07	-0.03	-0.06
CAGL0C02387g	0.1	0.04	0.41	-0.3	0.37	0.2	0.16	0.14
CAGL0L12474g	0.06	-0.12	0.46	-0.19	0.28	0.17	0	0.13
CAGL0H04719g	0.27	0.11	0.39	-0.16	0.32	0.09	0.23	0.03
CAGL0I04796g	0.12	-0.12	0.31	0.06	0.41	-0.04	0.01	-0.08
CAGL0H07755g	0.15	-0.02	0.31	-0.17	0.2	-0.09	0.14	-0.1
CAGL0J00539g	0.28	-0.01	0.29	-0.23	0.13	0	0.05	-0.01
CAGL0J05852g	0.07	-0.05	0.29	-0.28	0.35	0.1	0.09	0.06
CAGL0I09394g	0.01	0	0.25	-0.23	0.31	-0.14	0.29	-0.15
CAGL0I05610g	0.41	-0.2	0.24	-0.2	-0.03	0.08	0.08	-0.03
CAGL0M13211g	0.06	0.02	0.19	-0.23	0.32	-0.16	0.07	-0.16
CAGL0K00891g	0.5	-0.03	0.11	-0.02	0.15	-0.13	0.17	-0.15
CAGL0M02915g	0.51	-0.28	0.01	-0.11	0.12	0.09	0.16	-0.12
CAGL0M07001g	0.22	0.25	0.64	-0.23	0.11	0.01	0.26	-0.03
CAGL0H10626g	0.03	-0.13	0.23	-0.11	0.38	-0.06	0.35	-0.1
CAGL0K02761g	0.29	0.08	0.18	-0.34	0.18	-0.03	-0.06	0.01
CAGL0K07111g	0.39	0.16	0.09	-0.32	0.07	-0.23	0.43	-0.18
CAGL0M04015g	0.14	-0.08	0.4	-0.16	0.23	0.08	-0.04	0.11
CAGL0J03894g	-0.09	-0.15	0.33	-0.15	0.32	-0.07	0.07	-0.07
CAGL0A02750g	0.18	0.03	0.17	-0.25	0.33	-0.03	0.05	-0.05
CAGL0J11726g	0.33	0.04	0.15	-0.4	0.03	-0.06	0.03	-0.05
CAGL0I03740g	0.06	-0.13	0.37	-0.16	0.3	0.09	-0.03	0.13
CAGL0M11660g	-0.22	-0.3	0.31	-0.22	0.34	0.02	0.07	-0.06
CAGL0L03355g	0.21	-0.06	0.21	-0.17	0.19	-0.09	-0.13	-0.05
CAGL0F01199g	0.04	-0.04	0.2	-0.26	0.42	0.03	0.03	0
CAGL0I05236g	0.2	-0.05	0.17	-0.17	0.25	-0.09	0.1	-0.08
CAGL0M06105g	0.27	-0.02	0.14	-0.21	0.22	-0.07	-0.05	-0.04
CAGL0K08910g	0.19	0.11	0.14	-0.26	0.31	-0.14	0.21	-0.16
CAGL0C01705g	0.64	-0.04	0.12	-0.09	0.08	0.04	-0.03	-0.13
CAGL0H08525g	0.09	-0.03	0.66	-0.15	0.23	0.24	0.32	0.05
CAGL0H03641g	-0.08	-0.07	0.44	-0.2	0.27	-0.02	0.14	-0.02
CAGL0M09955g	0.19	-0.04	0.33	-0.26	0.2	0.1	0.02	0.08
CAGL0K11946g	0.31	-0.06	0.32	-0.07	0.27	0.11	0.23	0.17
CAGL0E00891g	0.22	-0.15	0.27	-0.17	0.35	0.24	0.01	0.11
CAGL0L05390g	0.06	-0.02	0.25	-0.23	0.13	-0.23	0.12	-0.14
CAGL0G05610g	0.08	-0.08	0.22	-0.06	0.37	-0.11	0.05	0
CAGL0E03652g	0.41	-0.06	0.16	-0.01	0.17	-0.11	0.03	-0.03
CAGL0K12782g	0.25	0.11	0.05	-0.36	0.2	-0.17	0.17	-0.22
CAGL0C03245g	0.24	0.01	0.46	0	0.43	0.2	0.14	0.21
CAGL0B02755g	0.12	0.25	0.41	-0.36	0.28	0	0.09	NA
CAGL0M08778g	0.22	-0.04	0.38	-0.22	0.11	0.05	0.08	0.1
CAGL0L07414g	0.05	-0.01	0.25	-0.32	0.32	0.03	0.05	0.06
CAGL0J03806g	0.28	-0.14	0.36	-0.08	0.26	0.21	0.08	0.16
CAGL0J06006g	-0.14	-0.03	0.32	-0.41	0.16	-0.13	0.25	-0.17
CAGL0I06985g	0.19	0.04	0.25	-0.36	0.01	-0.14	0.26	-0.21
CAGL0M10956g	0.32	0.05	0.24	-0.05	0.25	-0.1	0.18	-0.15
CAGL0E02255g	0.07	-0.05	0.21	-0.5	0.11	0.03	0.65	-0.25
CAGL0L10208g	0.36	0.03	0.19	-0.2	0.28	0.09	0.16	0.05
CAGL0I03300g	0.35	-0.24	0.13	0	0.14	-0.05	0.04	-0.06
CAGL0M06171g	0.07	0.41	0.3	-0.48	0.53	0.06	0.28	-0.03
CAGL0K01771g	0.06	-0.13	0.19	-0.05	0.29	-0.19	0.25	-0.13
CAGL0J09130g	0.3	-0.06	0.15	-0.19	0.13	-0.08	-0.04	-0.04
CAGL0A03542g	0.17	-0.09	0.09	-0.29	0.11	-0.16	0.17	-0.2
CAGL0K11462g	0.42	-0.2	0.06	-0.14	0.08	-0.01	0.2	0.2
CAGL0F08261g	0.24	-0.03	0.16	0.07	0.54	0	0.14	0.11
CAGL0J06908g	0.47	-0.07	0.05	0.01	0.26	-0.06	0.01	0.07
CAGL0K01969g	0.09	-0.04	0.37	-0.24	0.56	0.4	0.11	0.21
CAGL0B03267g	0.26	0.17	0.35	-0.15	0.16	-0.15	0.16	-0.09
CAGL0D03982g	0.3	-0.15	0.31	0.17	0.44	0.13	-0.07	0.05
CAGL0D04092g	0.1	0.01	0.31	-0.17	0.43	0.1	0.27	-0.08
CAGL0K05775g	0.18	0.03	0.27	-0.05	0.28	-0.15	0.16	-0.12
CAGL0C02849g	-0.05	0.14	0.27	-0.43	0.22	-0.17	0.25	-0.15
CAGL0K10274g	0.17	-0.08	0.21	-0.13	0.3	-0.01	0.19	-0.04
CAGL0F05841g	0.29	0.09	0.41	-0.15	0.09	-0.04	0.25	-0.01
CAGL0F08723g	0.11	0.06	0.39	-0.27	0.3	0.12	0.12	0.03
CAGL0J07678g	-0.07	-0.1	0.37	-0.45	-0.08	-0.12	0.25	-0.11
CAGL0L02145g	0.11	0	0.35	-0.23	0.17	-0.03	0.12	-0.02
CAGL0M13145g	0.16	0.08	0.34	-0.28	0.17	-0.02	0.11	-0.02
CAGL0F07513g	0.2	0	0.33	-0.07	0.32	0.03	-0.03	0.06
CAGL0F08503g	0.09	-0.11	0.27	-0.11	0.2	-0.11	0.2	-0.22
CAGL0F06787g	0.19	0.01	0.26	-0.16	0.27	-0.02	0.15	0.08
CAGL0G04895g	0.02	-0.24	0.23	-0.16	0.36	0.12	0	0.05
CAGL0I05148g	0.19	-0.11	0.21	0.04	0.28	-0.14	0.2	-0.18
CAGL0M06831g	0.32	0.01	0.21	-0.23	0.04	-0.1	-0.04	-0.04
CAGL0H06479g	0.28	0.01	0.21	-0.27	0.14	0	0.13	-0.02
CAGL0L09152g	0.19	0.07	0.19	-0.3	0.16	-0.12	0.19	-0.16
CAGL0G05225g	0.09	0.04	0.14	-0.3	0.25	-0.15	0.09	-0.12
CAGL0J07590g	0.08	-0.06	0.55	-0.22	0.26	0.28	0.08	0.22
CAGL0F06721g	0.1	-0.06	0.3	-0.11	0.21	-0.11	0.11	-0.03
CAGL0M07337g	0.06	0.05	0.3	-0.36	0.25	0.03	0.12	0.04
CAGL0G03905g	0.44	-0.09	0.13	-0.08	0.35	0.2	0.26	0.17
CAGL0G03289g	0.74	0.04	-0.03	-0.01	0.42	0.21	0.19	0.06
CAGL0I03674g	0.21	-0.12	-0.03	-0.3	0.01	-0.28	0.02	-0.24
CAGL0C03553g	0.2	-0.02	0.34	-0.17	0.33	0.18	-0.02	0.14
CAGL0A03740g	0.31	-0.14	0.21	0.07	0.4	0.11	0.04	0.06
CAGL0K07744g	-0.03	0.1	0.37	-0.18	0.37	-0.09	0.22	-0.15
CAGL0F04367g	0.11	0.06	0.36	-0.05	0.26	-0.16	0.17	-0.06
CAGL0C05269g	0.23	-0.01	0.29	-0.16	0.22	0.03	0.05	0
CAGL0J03762g	0.31	-0.15	0.14	-0.25	0.01	-0.02	0.01	-0.08
CAGL0K04895g	0.24	0.16	0.14	-0.36	0.25	-0.05	0.06	-0.11
CAGL0G06358g	0.32	0	0.13	-0.32	0.11	0	0.17	-0.01
CAGL0L02079g	0.35	-0.15	0	-0.1	0.16	-0.12	-0.05	-0.15
CAGL0I07249g	0.29	-0.05	0.47	-0.3	0.15	0.38	0.15	0.2
CAGL0C01991g	0.14	-0.07	0.21	-0.24	0.29	0.07	-0.05	0.07
CAGL0E03157g	0.22	-0.29	0.18	-0.1	0.03	-0.06	-0.27	-0.06
CAGL0E00671g	0.14	-0.14	0.17	-0.17	0.37	0.12	-0.1	0.09
CAGL0J08954g	0.27	0.12	0.13	-0.27	0.15	-0.17	-0.04	-0.12
CAGL0K09504g	0.27	0.01	0.11	-0.18	0.26	-0.06	0.24	-0.17
CAGL0G06402g	0.36	-0.11	0.07	-0.01	0.14	-0.18	0.1	-0.19
CAGL0H04543g	0.2	0.13	0.62	-0.14	0.32	0.28	0.21	0.17
CAGL0E00759g	0.19	0.07	0.51	-0.23	0.16	0.15	0.03	0.18
CAGL0J03630g	0.05	-0.03	0.48	-0.19	0.45	0.33	0.26	0.05
CAGL0D01276g	0.04	0	0.39	-0.17	0.41	0.14	0.04	0.14
CAGL0G04521g	0.12	0.11	0.31	-0.21	0.21	-0.13	0.01	-0.04
CAGL0B03509g	0.03	0.03	0.31	-0.35	0.26	0.05	-0.08	0.03
CAGL0B01903g	-0.13	0.08	0.28	-0.33	0.51	0.04	0	0
CAGL0G03773g	0.33	-0.27	0.27	0.17	0.34	0.17	0.04	0.04
CAGL0D00484g	-0.04	-0.28	0.26	-0.19	0.01	-0.17	0.01	-0.08
CAGL0J05280g	0	0	0.26	-0.26	0.43	0.08	0.11	0.06
CAGL0G04807g	-0.06	0.06	0.25	-0.39	0.38	0.03	0.08	-0.06
CAGL0M09020g	0.23	-0.01	0.24	0.06	0.49	0.04	0.06	0.04
CAGL0I01012g	0.28	0.06	0.17	-0.22	0.17	-0.09	0.07	-0.09
CAGL0M12430g	-0.25	-0.4	0.04	-0.33	0.27	-0.08	-0.02	-0.12
CAGL0I02508g	-0.06	-0.06	0.58	-0.01	0.45	0.18	0.18	0.02
CAGL0B04961g	-0.22	-0.06	0.5	-0.37	0.11	-0.04	0.08	-0.01
CAGL0I02728g	0.09	0.02	0.36	-0.16	0.2	-0.07	0.16	-0.17
CAGL0H09328g	0.21	0.06	0.35	-0.1	0.12	-0.14	0.16	-0.2
CAGL0E03267g	-0.16	0.01	0.3	-0.57	0.24	0.08	-0.06	0.04
CAGL0J11330g	0.21	0.04	0.28	-0.04	0.25	-0.12	0.25	-0.1
CAGL0D02024g	0.11	0.03	0.26	-0.21	0.28	-0.03	0.06	-0.08
CAGL0K03047g	0.14	-0.04	0.24	-0.13	0.23	-0.08	0.08	-0.03
CAGL0I03498g	0.25	-0.06	0.2	-0.17	0.24	0.06	-0.03	0.06
CAGL0B00682g	0.15	-0.04	0.19	-0.29	0.15	-0.04	0.11	-0.06
CAGL0L08074g	0.26	-0.02	0.1	-0.17	0.19	-0.12	0.02	-0.09
CAGL0K10626g	0.53	-0.28	0.08	0.42	0.4	0.01	0.17	0
CAGL0L05786g	0.22	-0.11	-0.08	-0.18	0.35	-0.08	0.06	-0.08
CAGL0L08580g	0.19	0.06	0.12	-0.24	0.18	-0.19	0	-0.15
CAGL0G02915g	0.12	-0.32	0.05	-0.2	0.09	-0.08	-0.12	0.07
CAGL0K11022g	0.15	-0.05	0.44	-0.22	0.23	0.24	0.07	0.1
CAGL0C05533g	0.3	0	0.28	-0.13	0.17	0.03	0	0.02
CAGL0M01540g	0.18	0.08	0.2	-0.28	0.25	-0.02	0.23	-0.07
CAGL0G06182g	0.43	-0.01	0.17	-0.15	0.06	-0.03	-0.06	0.02
CAGL0H03883g	0.32	-0.01	0.17	-0.03	0.28	-0.04	0.1	-0.06
CAGL0M09515g	0.2	0.04	0.17	-0.3	0.2	-0.02	0.07	-0.06
CAGL0L03179g	0.21	-0.09	0.06	-0.2	0.15	-0.14	0.12	-0.11
CAGL0K07139g	0.22	0.06	0.28	-0.21	0.32	0.12	0.24	0.04
CAGL0G02233g	0.19	0.09	0.26	-0.23	0.15	-0.11	0.36	-0.17
CAGL0L04730g	0.3	0.12	0.21	-0.09	0.23	-0.14	-0.02	-0.08
CAGL0F06875g	0.31	-0.15	0.06	0.01	0.21	-0.13	0.04	-0.17
CAGL0K06369g	0.28	0.16	0.24	-0.34	0.19	0.04	0.14	-0.04
CAGL0E00693g	0.22	0.01	0.15	-0.3	0.23	0.04	-0.08	0.02
CAGL0B01925g	0.43	-0.12	0.05	-0.04	0.15	-0.05	-0.03	-0.04
CAGL0M08932g	0.05	-0.05	0.45	-0.05	0.5	0.26	0.16	0.06
CAGL0M12573g	0.09	-0.07	0.38	-0.22	0.26	0.18	0.04	0.09
CAGL0L02343g	-0.08	-0.12	0.29	-0.08	0.4	-0.03	0.07	-0.05
CAGL0K01903g	0.27	-0.11	0.26	-0.26	0.24	0.3	0.21	0.25
CAGL0L02211g	0.17	0.06	0.19	-0.28	0.25	-0.01	0.19	-0.09
CAGL0L10472g	0.2	0.04	0.18	-0.25	0.18	-0.07	-0.06	0
CAGL0H08541g	0.14	-0.05	0.12	-0.31	0.18	-0.04	0.01	-0.16
CAGL0J01155g	-0.07	0.04	0.48	-0.23	0.36	0.12	0.14	0.15
CAGL0J10296g	0.57	0.15	0.31	-0.18	0.1	0.17	0.08	0.23
CAGL0C04301g	-0.01	0.15	0.29	-0.23	0.35	-0.13	0.16	-0.12
CAGL0L11902g	0.36	0	0.24	-0.13	0.16	0.05	0.04	-0.03
CAGL0L05522g	0.11	0	0.18	-0.21	0.23	-0.11	0.04	-0.1
CAGL0K06413g	0.12	-0.02	0.17	-0.22	0.19	-0.12	0.12	-0.13
CAGL0I09988g	0.2	0.11	0.15	-0.21	0.21	-0.18	0.11	-0.08
CAGL0J08415g	0.06	-0.37	0.07	-0.08	0.17	-0.09	0.07	-0.15
CAGL0I00836g	0.58	-0.05	-0.02	0.02	0.21	-0.04	0.06	-0.06
CAGL0E04048g	0.26	0.04	0.6	-0.05	0	0.04	0.43	-0.01
CAGL0L07898g	0.14	-0.08	0.42	-0.13	0.02	-0.04	0.01	0.05
CAGL0H10010g	0.51	-0.29	0.41	-0.01	-0.01	0.38	0.47	0.06
CAGL0M08734g	0.44	-0.03	0.37	0.04	0.16	0.13	0.2	0.15
CAGL0K02321g	0.16	-0.08	0.37	-0.17	0.27	0.22	0	0.21
CAGL0A03190g	0.09	-0.03	0.37	-0.21	0.24	0.11	0.1	0.06
CAGL0H06325g	0.1	-0.07	0.35	-0.21	0.08	-0.02	-0.09	-0.06
CAGL0F08569g	0.08	-0.06	0.29	-0.22	0.2	0.02	-0.04	0.1
CAGL0A02409g	0.06	-0.07	0.27	-0.3	0.32	0.19	-0.12	0.11
CAGL0D03498g	0.01	0.17	0.24	-0.28	0.45	-0.02	0.02	-0.02
CAGL0L08712g	0.37	-0.11	0.22	-0.05	0.09	0.01	0.03	0.06
CAGL0L08492g	0.19	0.05	0.17	-0.18	0.21	-0.13	0.04	-0.12
CAGL0L12540g	-0.04	-0.11	0.13	-0.31	0.19	-0.13	0.06	-0.11
CAGL0K04235g	0.13	-0.09	0.1	0.19	0.23	-0.47	-0.02	-0.4
CAGL0M00176g	-0.03	-0.08	0.06	-0.13	0.16	-0.43	0.1	-0.25
CAGL0A02431g	0.1	-0.17	0.48	-0.18	0.2	0.3	0.02	0.2
CAGL0A04147g	0.14	-0.03	0.18	-0.29	0.18	-0.01	-0.05	0.06
CAGL0J09284g	0.59	-0.08	0.14	-0.06	0.1	0.14	0.04	0.06
CAGL0G01848g	-0.04	0.01	0.51	-0.26	0.4	0.3	0.2	0.07
CAGL0K01595g	0.14	-0.02	0.36	-0.06	0.19	-0.05	0.19	-0.09
CAGL0L07150g	0.11	0.02	0.2	-0.28	0.14	-0.11	0.12	-0.06
CAGL0M07425g	0.13	0.02	0.16	-0.28	0.15	-0.12	-0.02	-0.09
CAGL0J11880g	0.17	-0.06	0.11	-0.15	0.17	-0.16	0.14	-0.1
CAGL0B04521g	0.17	-0.07	0.04	-0.29	0.24	-0.01	0.02	0
CAGL0M13959g	-0.16	-0.21	0.66	-0.2	0.04	0.13	0.13	0.12
CAGL0H06732g	-0.06	0	0.5	-0.08	0.47	0.17	0.19	0.12
CAGL0C04609g	0.04	-0.09	0.38	-0.11	0.34	0.14	-0.03	0.15
CAGL0C02739g	0.25	-0.08	0.34	0.16	0.35	0.04	0.38	-0.05
CAGL0J07172g	0.27	-0.09	0.15	-0.19	0.14	0.02	0.08	-0.03
CAGL0I01166g	0.98	0.21	0.08	-0.01	-0.05	-0.01	-0.07	-0.07
CAGL0K12474g	0.24	-0.09	0.08	-0.2	0.09	-0.12	0.17	-0.1
CAGL0D04818g	0.07	-0.02	0.26	-0.27	0.34	0.15	-0.02	0.05
CAGL0M09603g	0.18	0.01	0.41	-0.04	0.19	0	0.15	0.03
CAGL0A04125g	-0.2	0.08	0.4	-0.38	0.31	0	-0.03	-0.02
CAGL0G07931g	0.23	-0.04	0.34	0.04	0.39	0.15	0.1	0.07
CAGL0M13057g	-0.04	-0.03	0.21	-0.31	0.29	-0.01	0.17	0.01
CAGL0I02112g	0.26	-0.03	0.2	-0.21	0.13	0.02	0.05	0
CAGL0G09064g	0.17	0.09	0.15	-0.02	0.63	0.07	-0.24	0.19
CAGL0I02530g	0.09	-0.2	0.14	-0.18	0.2	0	0.19	-0.03
CAGL0L03223g	0.3	0.06	0.04	-0.22	0.15	-0.16	0.09	-0.19
CAGL0D05346g	0.21	0.17	0.4	-0.18	0.24	0.05	0.21	0.06
CAGL0H01617g	0.2	-0.02	0.24	-0.18	0.2	0.03	0.05	0.02
CAGL0J05434g	0.05	0.18	0.15	-0.3	0.3	-0.19	0.12	-0.13
CAGL0D04026g	0.2	-0.05	0.11	0.04	0.38	-0.11	0.03	-0.11
CAGL0L05412g	0.2	0.18	0.11	-0.27	0.32	-0.09	0.06	-0.05
CAGL0G10219g	0.15	-0.19	0.06	0.01	0.3	-0.12	0.17	0.02
CAGL0F00605g	0.35	-0.13	0.03	0.25	0.57	0.02	0.25	-0.27
CAGL0G01892g	0.16	-0.07	0.58	-0.04	0.4	0.45	0.17	0.18
CAGL0J04664g	-0.1	-0.2	0.41	-0.05	0.15	-0.09	0.18	-0.04
CAGL0C04543g	0.1	-0.11	0.38	-0.13	0.23	0.15	0.14	0.07
CAGL0D04004g	0.2	-0.1	0.32	-0.11	0.14	0.07	0.06	0.06
CAGL0G06776g	0.02	-0.03	0.31	-0.12	0.29	-0.03	-0.02	-0.06
CAGL0M13651g	0.12	-0.22	0.29	0.09	0.35	0.09	0.11	-0.01
CAGL0K05731g	-0.06	0.08	0.27	-0.34	0.15	-0.18	0.15	-0.23
CAGL0K08052g	0.22	-0.13	0.26	-0.13	0.11	0.05	0.07	0.01
CAGL0D02772g	0.28	-0.07	0.26	-0.07	0.19	0.07	0.13	-0.01
CAGL0J02090g	0.3	-0.06	0.25	-0.23	-0.07	-0.03	0.21	-0.06
CAGL0J02838g	0.03	-0.2	0.23	0.05	0.26	-0.13	0.14	-0.05
CAGL0D02156g	-0.02	-0.02	0.22	-0.25	0.31	-0.02	0.24	-0.09
CAGL0L01837g	0.26	0.17	0.21	-0.18	0.2	-0.12	0.21	-0.25
CAGL0F05995g	0.17	-0.03	0.2	-0.23	0.12	-0.05	-0.06	-0.02
CAGL0H03597g	0.22	0.1	0.19	-0.13	0.18	-0.18	0.1	-0.13
CAGL0E02827g	0.19	0.05	0.18	-0.17	0.2	-0.11	0.1	-0.05
CAGL0K04543g	0.1	0.03	0.18	-0.26	0.21	-0.08	0.07	-0.12
CAGL0H01375g	0.56	-0.36	0.16	0.23	0.18	0.23	0.03	0.05
CAGL0K01243g	0.19	0.14	0.1	-0.18	0.17	-0.3	0.01	-0.13
CAGL0H07227g	0.27	-0.07	0.08	-0.03	0.14	-0.21	-0.05	-0.1
CAGL0K08866g	0.22	0.04	0.08	-0.27	0.11	-0.16	0.05	-0.11
CAGL0H10472g	0.15	-0.01	0.03	-0.26	0.08	-0.27	-0.05	-0.18
CAGL0A00715g	0.11	-0.09	1.02	0.01	-0.14	0.27	0.43	-0.01
CAGL0L12716g	-0.03	0.07	0.56	-0.31	0.22	0.2	0.45	0.04
CAGL0A03905g	-0.39	0.01	0.41	-0.27	0.53	0.02	0.01	0
CAGL0J08778g	0.02	-0.06	0.36	-0.18	0.26	0.09	0.12	0.06
CAGL0J06380g	0.07	0.2	0.32	-0.25	0.03	-0.32	0.11	-0.32
CAGL0B02101g	0.13	-0.05	0.31	-0.17	0.2	0.07	-0.01	0.01
CAGL0I05478g	0.18	-0.12	0.28	-0.29	0.11	0.19	0.42	-0.12
CAGL0D01804g	0.18	-0.09	0.26	-0.14	0.01	-0.11	0.08	-0.11
CAGL0K04147g	0.07	-0.03	0.25	-0.16	0.29	0.01	0.04	0.05
CAGL0L07436g	0.16	-0.07	0.23	-0.11	0.17	-0.05	-0.09	0.03
CAGL0F03069g	0.11	-0.03	0.23	-0.22	0.28	0.08	0	0.06
CAGL0L03938g	0.27	-0.26	0.2	-0.02	0.02	-0.02	0	-0.04
CAGL0C04719g	0.34	-0.03	0.2	-0.15	0.43	0.36	-0.09	0
CAGL0I06270g	-0.05	-0.06	0.14	-0.23	0.09	-0.32	0.01	-0.17
CAGL0G05335g	0.26	-0.17	0.13	0.04	0.28	0.01	0.02	-0.07
CAGL0K03619g	0.33	-0.13	0.12	-0.12	-0.13	-0.22	0.25	-0.08
CAGL0M01848g	0.04	-0.18	0.57	-0.08	0.31	0.39	-0.03	0.2
CAGL0K11253g	0.1	0.05	0.45	-0.19	0.22	0.12	0.08	0.09
CAGL0B03611g	0.21	-0.1	0.42	-0.25	0.16	0.35	0.36	0.08
CAGL0M09295g	-0.03	-0.03	0.42	-0.19	0.31	0.13	0.19	0.06
CAGL0F03663g	0.06	-0.1	0.3	-0.03	0.43	0.13	-0.12	0.09
CAGL0M10659g	0.05	0	0.26	-0.29	0.11	-0.08	-0.08	0.01
CAGL0C01397g	0.43	0.05	0.09	0.25	0.43	-0.14	-0.06	0
CAGL0K00649g	0.38	-0.04	0.06	-0.1	0	-0.21	0.09	-0.12
CAGL0B03201g	0.51	0.06	-0.12	-0.02	0.26	-0.17	0.03	-0.07
CAGL0J05390g	0.56	0.44	1.2	0.59	0.35	0.3	0.86	0.54
CAGL0M11462g	0.15	0.05	0.41	-0.26	0.28	0.27	-0.05	0.22
CAGL0B02453g	0.16	-0.09	0.39	-0.07	0.28	0.21	0.1	0.16
CAGL0J03190g	0.22	0.07	0.34	-0.17	0.11	-0.01	0.13	-0.01
CAGL0I09108g	-0.03	-0.04	0.29	0.34	0.37	-0.45	0.24	-0.51
CAGL0C03762g	0.26	-0.1	0.25	-0.1	0.17	0.1	0.13	-0.1
CAGL0L07106g	0.31	-0.04	0.23	-0.09	0.06	-0.05	0	0.1
CAGL0F00803g	0.21	-0.07	0.15	-0.32	0.05	0.02	0	0
CAGL0B02409g	0.25	-0.07	0.13	-0.16	0.16	-0.01	0.06	0
CAGL0E05280g	0.54	-0.21	0.11	0.01	0.03	0.1	-0.15	0.16
CAGL0E02607g	0.18	-0.06	0.11	-0.03	0.2	-0.2	0.14	-0.12
CAGL0K07458g	0.26	-0.11	0.1	-0.03	0.22	-0.06	0.13	-0.03
CAGL0I08833g	0.15	0.13	0.09	-0.26	0.16	-0.25	0.13	-0.23
CAGL0M10087g	0.32	-0.06	0.03	-0.18	0	-0.19	0.01	-0.11
CAGL0L07282g	0.07	-0.03	0.02	-0.29	0.13	-0.24	0.12	-0.22
CAGL0M09713g	0.48	-0.03	0.01	-0.11	0.08	-0.07	-0.09	0.02
CAGL0K08844g	0.4	-0.08	-0.04	0.02	0.1	-0.26	-0.12	-0.22
CAGL0E01567g	-0.26	0.08	0.45	-0.37	0.41	0.11	0.5	-0.09
CAGL0C03465g	0.17	-0.12	0.23	-0.09	0.34	0.17	0.02	0.12
CAGL0G02717g	0.29	-0.09	0.28	-0.03	0.17	0.09	0.01	0.15
CAGL0C00495g	-0.01	0.18	0.61	-0.17	0.23	0.05	0.06	0.01
CAGL0I08525g	-0.03	0.14	0.34	-0.28	0.39	0.07	0.11	0.08
CAGL0E00539g	0.23	0.01	0.31	-0.2	0.24	0.2	0.22	0.12
CAGL0H07535g	0.12	0.07	0.31	-0.1	0.29	-0.02	0.15	-0.05
CAGL0K01881g	0.11	0.07	0.31	-0.27	0.21	0.06	0.13	0.07
CAGL0M12210g	-0.01	0.01	0.28	-0.23	0.05	-0.23	-0.08	-0.08
CAGL0J00847g	0.26	-0.15	0.27	-0.04	0.29	0.24	-0.19	0.06
CAGL0E04422g	0.21	0.07	0.23	-0.21	0.12	-0.07	-0.05	0.03
CAGL0M07568g	0.18	0.05	0.22	-0.21	0.31	0.1	0.09	0.12
CAGL0A00297g	0.31	-0.02	0.2	-0.12	0.16	0.04	0.16	-0.05
CAGL0L11044g	0.06	-0.14	0.2	-0.16	0.21	0	0.1	-0.05
CAGL0K11528g	0.52	0.05	0.18	-0.11	0.06	0.05	-0.05	0.08
CAGL0K10934g	0.18	0.08	0.18	-0.3	0.18	-0.01	0.01	-0.03
CAGL0G01804g	0.2	-0.08	0.16	-0.17	0.22	0.06	-0.05	0.06
CAGL0K08954g	0.04	0.16	0.13	-0.39	0.23	-0.14	0.37	-0.25
CAGL0K02783g	0.22	0.12	0.04	-0.29	0.2	-0.14	0.24	-0.17
CAGL0K03927g	0.48	-0.13	-0.02	-0.05	0.05	-0.08	0.19	-0.17
CAGL0J03212g	-0.08	-0.3	0.48	-0.11	0.15	0.2	-0.19	0.19
CAGL0I04554g	0	-0.01	0.34	-0.1	0.29	-0.02	0.05	0.02
CAGL0H00110g	0.07	-0.15	0.29	-0.07	0.34	0.16	0.3	0.15
CAGL0I02706g	0.05	0.06	0.21	-0.17	0.26	-0.13	0.1	-0.11
CAGL0G08778g	0.09	0.01	0.18	-0.32	0.28	0.1	0.13	0.04
CAGL0B03333g	0.19	0.07	0.17	-0.2	0.11	-0.16	0.03	-0.11
CAGL0D06292g	0.1	0.05	0.16	-0.22	0.24	-0.09	0.04	-0.07
CAGL0I09009g	0.24	-0.17	0.14	0.12	0.27	-0.06	0.13	-0.14
CAGL0F08063g	0.22	-0.07	0.09	-0.28	0.18	0.08	-0.09	0.07
CAGL0I00308g	0.21	0.22	0.08	-0.36	0.09	-0.24	0	-0.04
CAGL0A03872g	0.17	-0.11	0.06	-0.23	0.17	-0.02	-0.11	0.01
CAGL0G05049g	0.19	-0.01	0.06	-0.19	0.12	-0.19	0.05	-0.1
CAGL0H03619g	0.3	-0.05	-0.14	-0.12	0.22	-0.21	-0.11	-0.09
CAGL0L07568g	0.14	0.08	0.24	-0.32	0.3	0.16	0.13	0.03
CAGL0L04268g	0.27	-0.05	0.12	0.05	0.29	-0.08	0.18	-0.12
CAGL0J00561g	0.39	-0.03	0.08	0.03	0.45	0.16	0.18	-0.1
CAGL0D01760g	0.13	-0.04	0.4	0.05	0.33	0.1	0.13	0.02
CAGL0D03388g	0.23	0.03	0.04	-0.3	0.06	-0.15	-0.02	-0.13
CAGL0G07689g	0.3	0.14	0.04	-0.14	0.27	-0.14	0.22	-0.11
CAGL0K03069g	0.02	0.01	0.44	-0.12	0.18	0	0.1	0.09
CAGL0K09680g	0.21	-0.01	0.31	-0.26	0.22	0.26	0.2	0.13
CAGL0H01837g	0.09	-0.11	0.3	-0.15	0.29	0.19	0.02	0.15
CAGL0J01309g	0.08	0.08	0.25	-0.26	0.2	-0.04	0.03	-0.02
CAGL0K01705g	0.26	-0.04	0.18	-0.1	0.24	0.07	0.13	-0.01
CAGL0E05082g	0.22	-0.06	0.16	-0.06	0.2	-0.05	0.01	-0.06
CAGL0I07821g	0.08	0	0.16	-0.17	0.3	-0.04	-0.02	-0.01
CAGL0M02013g	0.17	0.06	0.14	-0.27	0.11	-0.12	-0.18	0.17
CAGL0A04301g	0.26	-0.23	0.1	0.09	0.21	-0.04	0.04	-0.15
CAGL0G05830g	0.19	0	0.08	0.01	0.36	-0.13	0	-0.1
CAGL0H02695g	0.35	-0.13	-0.01	0.14	0.24	-0.18	0.03	-0.15
CAGL0J06160g	0.05	0.11	0.22	-0.3	0.21	-0.08	0.12	-0.1
CAGL0J05324g	-0.06	-0.09	0.24	-0.14	0.28	-0.05	-0.07	0
CAGL0M02123g	0.28	-0.12	0.2	-0.08	0.19	0.13	0.01	0.12
CAGL0B02970g	0.32	-0.16	0.04	0.09	0.17	-0.14	0.18	-0.17
CAGL0K11836g	0.15	-0.05	0.42	-0.04	0.27	0.19	-0.03	0.02
CAGL0I04136g	0.01	0.07	0.42	-0.21	0.19	0.02	0.17	-0.04
CAGL0M02453g	-0.02	0	0.41	-0.23	0.24	0.12	0.34	0.05
CAGL0G05181g	0.18	0.02	0.38	-0.13	0.14	0.07	0.08	0.02
CAGL0C03003g	-0.09	0.1	0.37	-0.32	0.44	0.2	-0.07	0.19
CAGL0M09867g	0.16	-0.01	0.34	-0.25	-0.02	0	0.38	-0.31
CAGL0G09152g	0.18	-0.02	0.3	-0.24	0.11	0.11	0.07	0.09
CAGL0D04972g	0.12	-0.07	0.27	-0.03	0.23	-0.02	0.04	0.05
CAGL0F09185g	0.09	0.01	0.23	0.03	0.35	-0.11	0.29	-0.11
CAGL0L01705g	0.24	0.01	0.22	-0.16	0.09	-0.04	-0.11	0.08
CAGL0F01837g	0.15	0.07	0.18	-0.25	0.24	0.01	0.08	-0.04
CAGL0J01914g	0.07	0.01	0.16	-0.15	0.13	-0.24	0.23	-0.13
CAGL0L13200g	0.08	-0.04	0.1	-0.2	0.3	-0.02	0.1	-0.05
CAGL0I04884g	0.23	0.15	0.06	-0.23	0.17	-0.2	0.06	-0.1
CAGL0I05934g	0.59	-0.01	0.04	-0.17	0.24	0.31	0.32	0.04
CAGL0M01298g	0.15	-0.17	0	-0.2	0.13	-0.09	0.13	-0.14
CAGL0K05687g	0.49	0.1	-0.16	-0.12	0.47	0.08	0.11	0.05
CAGL0B04587g	-0.06	0.01	0.33	-0.22	0.42	0.16	-0.02	0.14
CAGL0C04873g	0.24	-0.02	0.32	-0.07	0.27	0.19	0.15	0.12
CAGL0F06259g	0.02	0.12	0.3	-0.23	0.38	0.08	0.13	0.05
CAGL0F06765g	0.31	-0.05	0.2	0.02	0.05	-0.14	0.11	-0.09
CAGL0H09394g	0.17	0.07	0.38	-0.23	0.21	0.19	0.09	0.12
CAGL0J05742g	-0.08	-0.08	0.38	-0.29	0.12	0.06	0.06	0.05
CAGL0I09042g	0.03	-0.02	0.36	-0.22	0.06	-0.04	0.03	0.06
CAGL0M11352g	0.03	-0.08	0.29	-0.08	0.24	-0.01	0.05	-0.09
CAGL0L03982g	0.36	-0.12	0.17	0.26	0.3	-0.04	-0.08	-0.01
CAGL0C03025g	0.09	-0.01	0.17	-0.23	0.15	-0.08	-0.02	-0.04
CAGL0J03850g	0.07	-0.06	0.14	-0.09	0.25	-0.12	0.01	-0.07
CAGL0K03421g	0.18	-0.1	0.13	0.06	0.4	0.02	-0.06	0.07
CAGL0F07975g	0.26	-0.04	0.11	-0.01	0.23	-0.08	-0.02	0.02
CAGL0K10494g	0.21	0.08	0	-0.29	0.08	-0.23	-0.04	-0.15
CAGL0L03069g	0.25	-0.11	-0.15	-0.27	0	-0.25	0.01	-0.18
CAGL0L08734g	0.09	0.07	0.24	-0.04	0.35	-0.08	0.14	-0.06
CAGL0K02475g	-0.19	0.17	0.42	-0.22	0.4	-0.04	0.09	-0.06
CAGL0F01617g	0.04	-0.04	0.33	-0.06	0.2	-0.05	0.16	-0.05
CAGL0I03388g	-0.03	0.09	0.33	-0.26	0.38	0.13	0.09	0.07
CAGL0L01573g	-0.07	-0.06	0.29	-0.25	0.14	-0.05	0.16	-0.13
CAGL0M13079g	0.05	-0.03	0.26	-0.18	0.31	0.11	0.15	0.2
CAGL0L07040g	0.12	0.06	0.26	-0.28	0.1	-0.02	0.05	-0.09
CAGL0M05005g	0.08	0.09	0.23	-0.31	0.3	0.11	0.08	0.04
CAGL0M06721g	0.09	-0.06	0.21	-0.15	0.3	0.09	-0.01	0.1
CAGL0J11132g	0.13	-0.06	0.11	-0.1	0.27	-0.05	0.16	-0.07
CAGL0I10450g	0.18	0.02	0.36	-0.11	0.21	0.12	-0.03	0.14
CAGL0M10890g	0.1	0	0.34	-0.08	0.35	0.15	0.05	0.07
CAGL0J06490g	0.11	0.22	0.32	-0.28	0.15	-0.08	0.16	-0.09
CAGL0M03289g	0.04	0.15	0.32	-0.31	0.26	0.06	0.13	0.02
CAGL0B03531g	0.16	-0.08	0.28	-0.25	0.12	0.17	0.07	0.11
CAGL0J02618g	0.12	-0.03	0.27	-0.21	0.01	-0.08	0.19	-0.16
CAGL0M09614g	0.25	-0.23	0.25	0.05	0.16	0.12	0.13	0.04
CAGL0F06963g	0.07	0.07	0.24	-0.26	0.25	0.03	0.1	-0.04
CAGL0L04224g	0.28	0.02	0.22	0.01	0.17	-0.08	0.22	-0.17
CAGL0J09196g	0.18	-0.04	0.21	-0.05	0.14	-0.1	0.06	-0.13
CAGL0J01870g	0.29	-0.02	0.17	-0.11	0.15	0.02	0.06	0.09
CAGL0H03663g	0.29	-0.01	0.04	-0.08	0.22	-0.08	-0.2	-0.03
CAGL0H09548g	0.19	0.05	0.01	-0.33	-0.02	-0.26	0	-0.21
CAGL0G02585g	0.33	-0.21	-0.02	0.01	0.26	0.05	-0.09	-0.08
CAGL0B00594g	0.79	0.49	0.3	-0.04	0.39	0.32	1.03	0.28
CAGL0G07909g	0.07	-0.08	0.3	-0.09	0.16	-0.01	0	-0.01
CAGL0M13497g	0.1	-0.07	0.25	-0.11	0.05	-0.13	0.11	-0.11
CAGL0A03927g	0.19	-0.13	0.23	0.01	0.34	0.17	-0.06	0.08
CAGL0I00616g	-0.02	-0.03	0.2	-0.23	0.04	-0.23	0.02	-0.19
CAGL0D01232g	0.2	-0.04	0.18	-0.05	0.21	-0.03	0.01	-0.02
CAGL0I02310g	0.16	0.07	0.18	-0.19	0.08	-0.17	0.05	0.01
CAGL0C05027g	0.45	0.04	0.08	0.07	0.28	-0.01	-0.06	-0.08
CAGL0I01496g	0.41	-0.38	0.01	0.25	0.11	-0.05	-0.12	-0.03
CAGL0H08195g	0.2	0.01	-0.05	-0.26	0.08	-0.23	-0.04	-0.16
CAGL0A02882g	-0.04	0.05	0.44	-0.14	0.27	0.05	0.55	-0.12
CAGL0M04037g	0.16	0.02	0.3	0.02	0.2	-0.09	0.05	-0.14
CAGL0K03993g	0.05	-0.09	0.22	-0.17	0.09	-0.09	0.25	-0.14
CAGL0I08965g	0.08	0.08	0.19	-0.19	0.25	-0.08	0.17	-0.06
CAGL0M07854g	0.06	0.07	0.19	-0.3	0.19	-0.04	0.27	-0.05
CAGL0F07315g	0.3	-0.12	0.11	-0.03	0.08	-0.07	0.06	0.02
CAGL0H09460g	0.16	-0.06	0.08	0.09	0.47	-0.03	-0.1	0.09
CAGL0M10483g	0.29	-0.02	-0.01	-0.15	0.01	-0.25	0.19	-0.19
CAGL0K03553g	0.66	-0.11	-0.15	-0.06	-0.04	-0.07	0	-0.07
CAGL0E03718g	0.17	0.03	0.17	-0.16	0.19	-0.04	0.03	-0.03
CAGL0L04350g	0.06	-0.02	0.44	-0.07	0.1	-0.01	0.26	-0.01
CAGL0K12056g	0.21	0.01	0.32	0.05	0.2	-0.03	-0.04	-0.01
CAGL0F01903g	0.08	0.02	0.29	-0.18	0.15	-0.02	0	0.01
CAGL0B04939g	0.11	-0.05	0.25	-0.22	0.03	-0.04	0.06	0
CAGL0L07238g	0.05	0	0.14	-0.19	0.17	-0.15	0.06	-0.11
CAGL0L06028g	0.14	-0.01	0.09	-0.22	0.12	-0.12	0.01	-0.06
CAGL0M07117g	0.26	0.04	0.38	-0.13	0.08	0.11	0.64	-0.01
CAGL0F04961g	-0.02	0.03	0.37	-0.12	0.01	-0.25	0.07	-0.15
CAGL0I08767g	0.04	0.02	0.3	-0.4	0.12	0.14	0.09	-0.03
CAGL0I09372g	0.01	-0.1	0.27	-0.07	0.25	0	0.12	0
CAGL0M01694g	0.14	-0.18	0.15	0.1	0.22	-0.11	0.04	-0.2
CAGL0G08954g	0.19	-0.12	0.12	-0.04	0.21	-0.02	0.02	0
CAGL0K03289g	0.23	-0.09	0.11	-0.07	0.22	0.02	-0.05	0
CAGL0C03740g	0.49	-0.1	0.02	0.02	0.18	0.07	0.05	-0.01
CAGL0G02035g	0.04	-0.05	0.31	-0.13	0.31	0.15	0.12	0.11
CAGL0M03333g	0.1	0.02	0.18	-0.2	0.12	-0.11	0.01	-0.1
CAGL0K10120g	0.35	-0.03	0.14	0.02	0.15	-0.04	0.09	-0.09
CAGL0G06050g	0.08	0	0.14	-0.23	0.62	0.38	0.3	0.06
CAGL0G02695g	0.17	0.19	0.52	-0.03	0.2	0.04	0.23	-0.02
CAGL0B02563g	0.16	-0.19	0.3	0.07	0.34	0.23	0.03	0.09
CAGL0M12947g	0.33	-0.05	0.29	-0.31	-0.14	0.15	-0.18	0.2
CAGL0E04444g	-0.07	0.01	0.25	-0.23	0.05	-0.24	-0.01	-0.15
CAGL0J02112g	0.29	-0.06	0.24	-0.1	0.07	0.07	0.11	0.1
CAGL0M10637g	0.11	-0.02	0.22	-0.08	0.26	0	0.08	0.01
CAGL0F08591g	0.32	-0.07	0.21	-0.12	-0.11	-0.08	0.15	-0.12
CAGL0J11682g	0.21	-0.02	0.18	-0.16	0.09	-0.03	0.01	-0.21
CAGL0I08503g	0.18	-0.15	0.15	-0.2	0.25	0.24	0.06	0.19
CAGL0L06512g	0.18	-0.08	0.15	-0.11	0.2	0.03	-0.02	0.02
CAGL0M12617g	0.03	0.03	0.15	-0.18	0.22	-0.14	0.21	-0.11
CAGL0L04312g	0.1	0.03	0.1	-0.22	0.29	-0.01	0.08	0.03
CAGL0E00495g	-0.14	-0.09	0.33	-0.16	0.19	-0.05	-0.01	0.03
CAGL0L08470g	0.23	-0.07	0.13	-0.19	0.24	0.18	0.3	-0.07
CAGL0H10274g	-0.09	0.04	0.51	-0.14	0.25	0.09	0.06	0.12
CAGL0K08074g	0.04	0.05	0.45	-0.2	0.16	0.12	0.08	0.14
CAGL0M09273g	0.11	0.01	0.41	-0.28	0.11	0.22	0.1	0.16
CAGL0C04477g	0.21	-0.03	0.26	-0.09	0.19	0.1	0	0.13
CAGL0K11209g	0.16	0.09	0.26	-0.16	0.28	0.09	0.07	0.11
CAGL0D05962g	0.18	0.01	0.24	-0.14	0.16	0.03	0.13	-0.03
CAGL0I09966g	0.33	0	0.12	0.05	0.08	-0.2	0.04	-0.11
CAGL0E00583g	0.01	-0.05	0.12	-0.32	0.29	0.11	0.25	0.14
CAGL0I08305g	0.24	-0.02	0.11	0.15	0.43	-0.03	0.23	-0.05
CAGL0L02387g	0.07	0.13	0.1	-0.34	0.13	-0.17	0.15	-0.2
CAGL0L11066g	0.08	0.18	0.06	-0.34	0.17	-0.21	0.12	-0.16
CAGL0C01485g	0.21	-0.03	0.04	-0.24	0.17	0.01	-0.03	0.02
CAGL0K07964g	0.65	-0.04	0.01	-0.01	0.06	0.09	0.05	0.11
CAGL0C01435g	0.1	0.06	0.48	0.06	0.24	0.02	0.18	0.01
CAGL0C03179g	-0.01	-0.05	0.24	-0.16	0.21	-0.03	0	0.01
CAGL0M05863g	0.08	0.05	0.23	-0.21	0.19	-0.02	0.05	0
CAGL0I01386g	0.21	-0.13	0.22	0.07	0.34	0.15	0.02	0.14
CAGL0G02123g	0.19	-0.11	0.16	0.02	0.19	-0.05	0.01	0.01
CAGL0L05588g	0.21	-0.08	0.16	-0.19	0.13	0.09	0.09	0.07
CAGL0I06402g	0.13	0.09	0.16	-0.21	0.33	0.06	0.2	0.06
CAGL0G04829g	0.27	0.01	0.11	-0.06	0.18	-0.07	0.21	-0.13
CAGL0J08800g	0.04	0.01	0.09	-0.11	0.22	-0.23	0.13	-0.21
CAGL0F08679g	0.18	0.01	0.05	-0.27	0.13	-0.06	0	-0.01
CAGL0E02123g	0.14	-0.04	0.23	-0.26	0.2	0.2	0.1	0.09
CAGL0I01804g	0.1	0.11	0.23	-0.07	0.31	-0.07	0.2	-0.02
CAGL0M11946g	-0.11	-0.06	0.38	-0.16	0.31	0.13	-0.02	0.09
CAGL0M01650g	0.03	-0.03	0.21	-0.18	0.31	0.09	-0.07	0.11
CAGL0H07315g	0.07	-0.01	0.19	-0.38	0.15	0.13	0.06	0.16
CAGL0L02299g	0.06	-0.06	0.15	-0.14	0.25	-0.01	-0.14	0.03
CAGL0G03399g	0.2	-0.14	0.12	-0.2	0.03	0.02	0.14	-0.05
CAGL0D03586g	0.13	-0.02	0.12	-0.22	0.27	0.09	0.22	-0.05
CAGL0G09020g	0.2	0.03	0.1	-0.02	0.37	-0.01	-0.02	-0.04
CAGL0L05104g	0.14	0.07	0.09	-0.23	0.15	-0.13	-0.03	-0.09
CAGL0I00396g	0.35	-0.08	0.22	0.27	0.3	0.01	0.08	0.24
CAGL0I10945g	0.14	-0.06	0.16	-0.09	0.13	-0.09	0.04	-0.05
CAGL0B03113g	0.2	-0.12	0.14	-0.16	0.08	0.03	-0.05	0.08
CAGL0H05313g	0.12	-0.09	0.15	-0.17	0.06	-0.07	0.06	-0.08
CAGL0M05247g	0.03	0.01	0.32	-0.2	0.16	0.04	0.22	-0.07
CAGL0K06501g	0.11	0.05	0.24	-0.3	0.2	0.14	0.15	-0.03
CAGL0J03234g	-0.34	-0.37	0.2	-0.31	0.12	0	0.33	0.11
CAGL0G01474g	0.22	-0.05	0.16	-0.11	0.21	0.09	0.1	-0.03
CAGL0J10560g	0.12	0.06	0.16	-0.22	0.17	-0.05	0.02	0.05
CAGL0E01639g	0.33	-0.04	0.15	-0.02	0.15	0.03	0.34	0
CAGL0M00858g	0.26	0.05	0.14	-0.04	0.13	-0.14	-0.01	-0.09
CAGL0K12100g	0.47	-0.16	0.1	0.13	0.17	0.11	0.01	0.08
CAGL0H07557g	0.08	0.1	0.1	-0.3	0.2	-0.08	-0.01	-0.08
CAGL0E03872g	0.14	-0.13	0.09	-0.06	0.1	-0.14	0.03	-0.13
CAGL0K05423g	0.19	-0.08	0.04	-0.23	0	-0.12	-0.06	-0.03
CAGL0I07271g	0.25	-0.05	-0.03	-0.16	0.14	-0.09	-0.03	-0.15
CAGL0F03135g	0.12	-0.08	-0.06	-0.2	0.09	-0.23	0.03	-0.13
CAGL0J09702g	0.12	-0.05	0.56	-0.08	0.34	0.49	0.16	0.19
CAGL0A03051g	0.07	0.09	0.37	-0.09	0.29	0.07	0.26	-0.06
CAGL0M04191g	0.06	-0.15	0.32	-0.09	0.11	0.07	-0.04	0.03
CAGL0E03432g	0	-0.21	0.26	-0.44	0.06	0.31	0.89	-0.21
CAGL0F05775g	0.11	0.02	0.24	-0.24	0.03	-0.06	-0.02	-0.09
CAGL0G05291g	0.01	-0.11	0.14	-0.22	0.12	-0.06	0.15	-0.13
CAGL0I00682g	0.22	0.04	0.13	-0.12	-0.02	-0.25	0.11	-0.08
CAGL0M08426g	0.41	-0.21	0.06	0.15	0.07	-0.06	-0.07	0
CAGL0F07777g	0.45	-0.27	0.03	0.27	0.1	-0.08	0.05	-0.11
CAGL0A01672g	0.23	0.11	0.03	-0.29	0.16	-0.06	-0.02	-0.04
CAGL0E02651g	0.31	-0.16	-0.03	0.15	0.32	-0.05	0.04	-0.03
CAGL0J09966g	0.14	-0.13	0.32	-0.12	0.14	0.2	-0.1	0.11
CAGL0M02739g	0.14	-0.03	0.26	-0.14	0.07	-0.01	0.24	-0.06
CAGL0M11924g	0.26	-0.02	0.17	-0.18	0.13	0.11	0.1	0.08
CAGL0C05291g	0.22	0	0.15	-0.14	0.07	-0.07	-0.04	-0.06
CAGL0L01485g	0.56	-0.01	-0.01	-0.07	0.16	0.14	0.26	-0.07
CAGL0K06589g	0.03	0.05	0.32	-0.2	0.11	-0.04	-0.04	-0.02
CAGL0J06204g	0.1	-0.15	0.29	0.05	0.25	0.09	0.15	0.04
CAGL0B04543g	0.19	-0.12	0.28	0.1	0.29	0.13	0.1	0.15
CAGL0L05544g	-0.07	0.12	0.28	-0.22	0.24	-0.1	0.24	-0.12
CAGL0L00957g	0.19	0	0.27	0.06	0.38	0.13	0.02	0.11
CAGL0J09372g	-0.01	-0.13	0.26	-0.12	0.23	0.08	-0.08	0.06
CAGL0H06677g	0.16	0.09	0.22	-0.14	0.27	0.05	0.12	0.02
CAGL0F01551g	-0.03	-0.06	0.15	-0.35	0.14	0.02	0.31	-0.01
CAGL0J03058g	0.21	-0.07	0.12	0	0.47	0.22	0.05	0.18
CAGL0J08096g	0.1	0.11	0.11	-0.27	0.16	-0.12	0.02	-0.06
CAGL0H02387g	0.18	-0.17	0.08	0.3	0.49	-0.03	0.08	-0.16
CAGL0J05874g	0.22	0.05	0.08	-0.31	-0.08	-0.17	-0.01	-0.17
CAGL0M13189g	0.32	-0.23	0.04	0.13	0.32	0.13	0.08	0.02
CAGL0I07865g	0.04	-0.11	0.04	0.07	0.38	-0.15	0.08	-0.24
CAGL0I05896g	0.33	-0.13	0.02	-0.05	0.14	0.02	-0.01	0.05
CAGL0I05830g	0.24	-0.01	-0.07	-0.24	0.07	-0.16	0.01	-0.07
CAGL0K10164g	0	-0.73	-0.1	0.33	0.45	0.1	0.15	0.12
CAGL0F09097g	0.68	-0.17	-0.15	0.01	-0.17	-0.13	-0.07	-0.06
CAGL0K11858g	0.15	-0.08	0.26	0	0.2	0.04	0.27	0.09
CAGL0E05170g	0.2	-0.14	0.24	0.07	0.19	0.05	0.09	-0.01
CAGL0H03355g	0.14	0	0.24	-0.23	-0.04	-0.08	0.16	-0.11
CAGL0I04466g	0.18	0.01	0.22	-0.22	0.11	0.07	0.12	0.05
CAGL0C01573g	0.03	-0.08	0.18	-0.16	0.26	0.06	-0.05	-0.06
CAGL0E01551g	0.01	0.11	0.14	-0.21	0.41	0.01	0.1	0.05
CAGL0C04785g	0.07	-0.07	-0.02	0.05	0.6	0.02	0.03	0.09
CAGL0I08481g	0.08	-0.07	0.31	0.04	0.2	-0.02	0.07	-0.07
CAGL0M09471g	0.12	-0.01	0.26	-0.15	0.31	0.21	0.16	0.05
CAGL0K07480g	0.32	-0.21	0.02	0.12	0.27	0.06	-0.06	0.06
CAGL0L12628g	0.14	0.01	0.41	-0.13	0.06	0.09	0.04	0.09
CAGL0I00858g	0.07	0.01	0.31	-0.12	0.17	0.02	0.24	-0.15
CAGL0F06127g	-0.11	-0.03	0.29	-0.29	0.11	-0.03	0.32	-0.13
CAGL0I10472g	0.04	0.01	0.26	-0.08	0.31	0.04	-0.06	0.02
CAGL0I04972g	0.12	0.01	0.25	-0.14	0	-0.14	0.47	-0.18
CAGL0J07810g	0.32	-0.01	0.23	-0.15	0.07	0.14	-0.08	0.13
CAGL0K09394g	0.33	0.09	0.18	-0.12	0.14	0.04	0.19	-0.04
CAGL0D05478g	0.16	0.04	0.12	-0.13	0.25	-0.02	0.04	-0.02
CAGL0K10230g	0.05	0.05	0.11	-0.24	0.12	-0.17	0.13	-0.09
CAGL0M11374g	0.04	-0.03	0.08	-0.25	0.13	-0.11	-0.07	-0.04
CAGL0K09526g	0.3	0.09	0.02	-0.12	0.17	-0.12	0.09	-0.07
CAGL0K05665g	0.4	0.2	-0.06	-0.08	0.18	-0.24	0.13	-0.31
CAGL0G04961g	-0.2	0.19	0.39	-0.37	0.33	0.06	0.46	-0.14
CAGL0M06765g	-0.01	-0.07	0.26	-0.04	0.22	-0.06	0.1	-0.02
CAGL0C04807g	0.15	0.01	0.24	0.01	0.3	0.03	0.06	0.03
CAGL0E06358g	0.23	-0.15	0.02	0.03	0.33	0.06	0.23	0.3
CAGL0G05329g	0.17	-0.05	0.37	-0.06	0.11	0.13	-0.11	0.01
CAGL0J06116g	0.15	0.04	0.16	-0.2	0.09	-0.07	0	-0.1
CAGL0L09713g	0.03	-0.08	0.09	-0.13	0.25	-0.05	0.21	-0.13
CAGL0E06490g	0.08	0.14	0.07	-0.28	0.16	-0.18	0.08	-0.19
CAGL0I02002g	0.28	0	-0.01	-0.13	0.03	-0.2	0.19	-0.23
CAGL0I05170g	0.31	-0.08	-0.15	-0.18	-0.04	-0.25	-0.01	-0.15
CAGL0I02948g	-0.01	-0.04	0.42	-0.16	0.27	0.25	0.04	0.11
CAGL0I03432g	0.06	0.01	0.41	0	0.25	0.08	0.03	0.19
CAGL0D02926g	-0.1	-0.02	0.41	-0.14	0.3	0.14	0.06	0.15
CAGL0H09086g	0.02	-0.01	0.27	-0.08	0.36	0.11	0.12	0.13
CAGL0H01089g	0.25	-0.17	0.23	0.31	0.29	0	0.1	-0.06
CAGL0K03531g	0.26	0.01	0.22	-0.03	0.17	0.04	-0.01	0.12
CAGL0L01683g	0.22	0.13	0.21	-0.2	0.03	-0.1	0.27	-0.23
CAGL0L04620g	0.07	0.06	0.2	-0.14	0.12	-0.16	0.1	-0.11
CAGL0J02128g	0.19	0.01	0.19	-0.02	0.13	-0.11	0.1	0.03
CAGL0L03542g	0.21	0.11	0.18	-0.12	0.21	-0.02	0.03	0.02
CAGL0M09339g	0.2	0.16	0.16	-0.11	0.15	-0.17	0.02	-0.09
CAGL0K12188g	0.24	0.07	0.14	-0.12	0.11	-0.09	0.05	-0.1
CAGL0G01672g	0.04	0.13	0.14	-0.3	0.13	-0.15	0.11	-0.16
CAGL0C03443g	0.16	-0.12	0.09	-0.05	0.31	0.1	-0.08	-0.07
CAGL0C00275g	0.68	-0.05	0.08	0.3	0.08	-0.04	0.13	-0.14
CAGL0J03388g	0.11	-0.05	0.07	-0.23	0.22	0.05	0.04	0.11
CAGL0J11418g	0.03	-0.06	0.02	-0.23	0.15	-0.14	0.18	-0.14
CAGL0E04598g	0.28	-0.04	-0.13	-0.28	0.08	-0.08	-0.14	-0.03
CAGL0D04840g	0.13	-0.02	0.57	-0.02	0.19	0.3	0.08	0.25
CAGL0J08437g	-0.14	-0.05	0.42	-0.12	0.23	0.05	0	0.06
CAGL0K10912g	0.18	0.09	0.24	-0.06	0.24	0	-0.02	-0.02
CAGL0M03883g	0.22	0.14	0.21	-0.11	0.16	-0.07	-0.05	0.04
CAGL0M02937g	0.11	-0.12	0.06	-0.17	0.09	-0.08	-0.09	-0.06
CAGL0F07007g	0.2	0.03	0.28	-0.05	0.35	0.23	0.05	0.18
CAGL0K11066g	0.12	0.01	0.28	-0.14	0.07	-0.02	0.1	0.05
CAGL0K04521g	0.17	0.09	0.27	0	0.34	0.07	0.14	0.1
CAGL0I00946g	0.18	0	0.24	-0.1	0.03	-0.07	0.02	-0.07
CAGL0K01815g	0.23	0.06	0.24	-0.15	0.17	0.11	0.12	0.12
CAGL0H04301g	0.07	-0.29	0.19	0.11	0.03	-0.15	0.16	-0.1
CAGL0C02497g	0	0.08	0.17	-0.45	0.03	-0.05	0.06	-0.07
CAGL0H03443g	0.14	0.02	0.15	-0.2	0.14	-0.01	-0.08	0.03
CAGL0B02739g	0.3	-0.07	0.12	-0.18	-0.07	-0.02	0	0.05
CAGL0B04037g	0.07	-0.01	0.12	-0.13	0.28	-0.01	0.08	0.03
CAGL0F03487g	-0.18	0.12	0.51	-0.27	0.28	0.14	0.09	0.07
CAGL0F03553g	-0.02	0.03	0.32	-0.12	0.26	0.03	0.24	-0.07
CAGL0E02299g	0.18	-0.03	0.31	0.01	0.13	0.02	0.04	-0.01
CAGL0G05654g	0.1	0.02	0.31	-0.04	0.17	-0.02	0.18	-0.05
CAGL0C01881g	0.01	-0.08	0.26	-0.09	0.26	0.08	0.08	0.08
CAGL0K01925g	0.02	-0.03	0.16	-0.12	0.21	-0.08	0	0
CAGL0K05643g	0.25	0.14	0.14	-0.12	0.28	0.03	0.04	0.01
CAGL0E01859g	0.04	-0.5	0.13	0	0.07	0.12	0.07	0.08
CAGL0J11550g	0.3	-0.01	0.13	-0.12	0.1	0.04	-0.04	-0.02
CAGL0G00396g	0.19	0.09	0.13	-0.13	0.21	-0.05	0.01	0.03
CAGL0I04026g	-0.04	-0.14	0.06	-0.38	0.11	0.03	-0.21	0.01
CAGL0J06820g	0.32	-0.12	-0.06	-0.11	-0.08	-0.21	0	-0.18
CAGL0J10846g	0.25	-0.05	-0.11	-0.15	0.2	-0.08	0.24	-0.15
CAGL0D03278g	0.04	0.09	0.42	-0.09	0.19	0.03	0.17	0.05
CAGL0J09724g	0.05	0.06	0.28	0	0.42	0.07	0.09	0.02
CAGL0M09889g	0.35	-0.05	0.16	-0.12	0.08	0.14	0.22	0.1
CAGL0E01023g	0.03	-0.02	0.39	-0.23	0.15	0.21	0.13	0.24
CAGL0B01441g	0.03	-0.02	0.34	-0.13	0.16	0.07	0.05	0.05
CAGL0F02695g	0.14	-0.01	0.33	0.11	0.25	0.01	-0.01	0.05
CAGL0K04279g	0.29	-0.12	0.12	-0.03	0.11	0.06	0.21	-0.14
CAGL0L04334g	0.25	0.1	0.1	-0.02	0.16	-0.18	-0.03	-0.08
CAGL0M07205g	0.22	0	0.07	-0.11	0.15	-0.06	0.07	-0.05
CAGL0K11418g	-0.16	-0.17	0.07	-0.23	0.25	-0.05	-0.17	-0.01
CAGL0G06732g	0.4	-0.15	0.05	0.28	0.24	-0.05	0.07	-0.12
CAGL0H02893g	0.41	-0.16	-0.06	0.04	0.01	-0.13	-0.02	-0.12
CAGL0H05137g	0.56	-0.19	-0.18	-0.27	-0.21	0.02	-0.13	0.02
CAGL0J03498g	-0.08	0.11	0.39	-0.17	0.34	0.1	0.21	0.04
CAGL0M00572g	0.07	0.02	0.38	-0.16	0.19	0.17	0.2	0.07
CAGL0F07535g	-0.18	-0.02	0.33	-0.16	0.39	0.11	0	0.12
CAGL0M07612g	0.15	-0.06	0.31	0	0.25	0.16	0.02	0.11
CAGL0F03201g	0.06	0.06	0.27	0.04	0.24	-0.14	-0.01	-0.08
CAGL0G06072g	0.05	-0.09	0.22	-0.04	0.3	0.09	0.01	0.08
CAGL0A02387g	0.08	0	0.21	-0.05	0.26	-0.01	-0.07	0.02
CAGL0K01023g	0.22	-0.06	0.19	0.04	0.09	-0.09	0.03	-0.09
CAGL0B02255g	0.21	-0.06	0.18	0.05	0.12	-0.09	0.04	-0.03
CAGL0J11198g	0.14	0.06	0.18	0.03	0.14	-0.24	0.06	-0.17
CAGL0J01661g	0.24	-0.07	0.14	0.04	0.33	0.13	0.18	0.04
CAGL0E00913g	0.07	-0.04	0.13	-0.1	0.19	-0.08	0	0.01
CAGL0B03619g	0.03	-0.13	0.1	0.02	0.38	0.01	0	0.02
CAGL0I06094g	0.18	0.06	0.07	-0.01	0.3	-0.11	0.11	-0.09
CAGL0K10648g	0.1	0.02	0.05	-0.23	0.09	-0.16	-0.02	-0.11
CAGL0A01199g	0.18	-0.04	-0.06	0.05	0.27	-0.23	0.08	-0.15
CAGL0H09174g	0.12	-0.08	0.41	0.04	0.24	0.2	0.19	0.03
CAGL0A02695g	0.05	-0.05	0.41	0.02	0.3	0.19	0.06	0.11
CAGL0G09383g	0.43	0.03	0.4	0.38	0.51	0.33	0.3	0.62
CAGL0G07953g	0.02	0.03	0.3	-0.08	0.2	-0.03	-0.17	0.11
CAGL0H08261g	0.19	-0.03	0.21	0.09	0.2	-0.06	-0.12	0.1
CAGL0A04323g	0.05	-0.15	0.18	-0.14	0.15	0.07	0.16	-0.01
CAGL0C03509g	0.21	-0.02	0.17	-0.08	0.18	0.06	0.06	0.03
CAGL0L11242g	0.27	0.13	0.09	-0.27	0.03	-0.07	0.03	-0.09
CAGL0G08019g	0.24	-0.3	-0.01	0.3	0.24	-0.13	0.22	-0.15
CAGL0L11748g	-0.07	0.01	0.43	-0.15	0.22	0.12	0.05	0.01
CAGL0A00319g	0.19	-0.09	0.2	-0.09	0.08	0.05	0.06	0.09
CAGL0J04136g	0.25	-0.01	0.18	-0.16	0.02	0.02	-0.15	0.09
CAGL0K05379g	0.12	-0.03	0.1	-0.08	0.19	-0.08	0.01	0.03
CAGL0L02541g	0.19	0.15	0.09	-0.29	0.17	-0.01	0.1	-0.08
CAGL0H04631g	0.18	0.02	0.08	-0.21	0.11	-0.04	-0.05	-0.05
CAGL0I05962g	0.22	-0.13	0.07	0	0.2	0.02	0	0.03
CAGL0F06215g	0.23	0	0.03	-0.23	0.01	-0.1	0.1	-0.07
CAGL0C00407g	0.35	-0.03	-0.06	-0.16	-0.04	-0.16	-0.05	-0.11
CAGL0I09746g	0.04	-0.2	0.3	0.13	0.46	0.28	0.03	0.13
CAGL0L06930g	-0.12	0.06	0.3	-0.31	0.38	0.22	0.56	-0.11
CAGL0G04147g	0.16	0.04	0.23	-0.16	0.06	-0.02	0.04	-0.02
CAGL0D06138g	0.19	-0.1	0.21	0.1	0.26	0.07	0.04	0.04
CAGL0G02453g	0.17	-0.2	0.2	0.17	0.18	-0.01	0.09	-0.06
CAGL0F06693g	0.2	0.05	0.17	-0.12	-0.02	-0.17	0.15	-0.1
CAGL0J09878g	0.25	0.11	0.16	-0.08	0.16	-0.05	0.03	-0.06
CAGL0K02629g	0.51	-0.28	0.11	0.11	0.07	0.27	0.19	0.17
CAGL0F08283g	0.2	0.06	0.08	-0.2	0.03	-0.14	0.04	-0.08
CAGL0K06017g	0.32	0.12	0.05	-0.15	0.03	-0.16	0.09	-0.12
CAGL0G06688g	0.2	-0.08	0.04	-0.23	0.02	-0.02	-0.05	-0.06
CAGL0F06941g	-0.03	-0.16	0	0.32	0.38	-0.4	0.25	-0.38
CAGL0K02299g	0.24	-0.12	-0.03	-0.18	0.03	-0.05	0.01	-0.07
CAGL0I10791g	0.09	-0.07	-0.11	-0.04	0.56	0.06	0.01	0.08
CAGL0K06033g	-0.31	0.2	0.38	-0.32	0.24	-0.16	0.33	-0.05
CAGL0M10329g	0.21	0.03	0.37	0.05	0.25	0.16	0.52	-0.05
CAGL0B01353g	0.1	0.03	0.21	-0.23	0.1	0.02	-0.01	0.04
CAGL0H02409g	-0.1	0.27	0.2	-0.33	0.21	-0.22	0.41	-0.26
CAGL0L12276g	0.12	0.02	0.18	-0.1	0.22	0.01	0.03	0.07
CAGL0L08778g	0.15	-0.02	0.15	-0.15	0.09	-0.03	0.04	-0.03
CAGL0L09845g	0.11	-0.05	0.06	-0.21	-0.02	-0.18	-0.01	-0.13
CAGL0M08382g	0.14	0.04	0.04	-0.12	0.25	-0.08	-0.13	-0.05
CAGL0I05456g	0.19	0.02	0.19	-0.21	0.07	0.05	0.03	-0.08
CAGL0I08261g	0.05	-0.31	0.12	-0.09	-0.04	-0.06	0.03	-0.02
ATP9	0.12	0.1	1.31	0.61	-0.06	0.08	1.27	0.08
CAGL0I03036g	0.11	0.09	0.38	0.04	0.28	0.06	0.11	0.07
CAGL0A03036g	-0.16	-0.05	0.32	-0.14	0.12	-0.11	-0.04	-0.08
CAGL0C04851g	0.1	0.01	0.31	-0.16	0.2	0.18	0.33	0.02
CAGL0G07425g	0.02	-0.17	0.13	-0.13	0.1	-0.03	-0.12	0.04
CAGL0I07777g	0.09	-0.07	0.12	-0.18	0.14	0.02	-0.12	0.11
CAGL0J05368g	0.1	0.06	0.12	-0.3	0.05	-0.07	0.1	-0.14
CAGL0D00792g	0.15	0.02	0.11	-0.11	0.17	-0.06	0.07	-0.03
CAGL0H09988g	0.16	0.09	0.11	-0.22	0.13	-0.05	0.01	0.03
CAGL0A03949g	0.05	-0.14	0.1	-0.08	0.12	-0.09	0.04	-0.07
CAGL0B03355g	0.17	0.1	0.06	-0.2	0.2	-0.05	0.02	0.01
CAGL0M10439g	0.17	-0.13	0.05	0.09	0.28	-0.04	0.07	-0.04
CAGL0M13981g	0.43	-0.15	0.02	0.06	0.06	0.02	0.07	-0.01
CAGL0K05467g	0.19	-0.08	-0.08	0.12	0.13	-0.38	0.19	-0.38
CAGL0D01320g	-0.05	-0.19	0.4	-0.1	0.07	0.13	0.19	0
CAGL0J03828g	0.06	0.02	0.37	-0.18	0.25	0.26	0.04	0.19
CAGL0C04367g	-0.07	0.09	0.35	-0.15	0.4	0.16	0.33	0
CAGL0M06347g	0.3	-0.1	0.3	0.2	0.33	0.25	0.15	0.15
CAGL0H01749g	-0.14	-0.02	0.3	-0.42	0.14	0.16	0.12	0
CAGL0H03201g	0.18	0.02	0.29	-0.09	0.02	-0.02	0.09	0.02
CAGL0F03817g	0.17	-0.08	0.22	-0.09	0.01	-0.01	-0.06	0.01
CAGL0M09405g	0.21	-0.04	0.19	-0.05	0.1	0.01	-0.05	0.08
CAGL0D01584g	0.23	0.03	0.15	0.15	0.27	-0.11	0.19	-0.08
CAGL0J03872g	0.23	-0.08	0.07	-0.09	0.14	0.03	-0.06	0.07
CAGL0J05632g	0.35	-0.08	0.04	-0.01	0.1	0	0.04	0.05
CAGL0A01738g	0.21	-0.12	0.03	0.03	0.13	-0.12	0.18	-0.16
CAGL0A00363g	0.6	-0.39	-0.25	0.11	-0.09	-0.03	0.05	-0.02
CAGL0C04631g	0.11	0.04	0.27	-0.2	0.06	0.03	0.08	0
CAGL0L10230g	-0.01	0.06	0.26	-0.23	0.14	-0.01	0.03	0.04
CAGL0D00814g	0.09	0.01	0.24	-0.14	0.22	0.11	0.18	0.11
CAGL0A00825g	0.06	0.02	0.23	-0.11	0.14	-0.05	0.07	0.03
CAGL0E04400g	0.14	0.04	0.22	0.01	0.2	-0.06	0.05	-0.06
CAGL0L02057g	0.04	0	0.15	-0.17	0.14	-0.07	0.06	-0.06
CAGL0A04345g	0	0.14	0.14	-0.23	0.22	-0.12	0	-0.06
CAGL0H08481g	0.17	0.08	0.13	-0.22	0.05	-0.08	0.04	-0.07
CAGL0J09768g	0.22	0.08	0.12	-0.14	0.17	0	0.06	0.08
CAGL0H06545g	0.09	-0.06	0.09	-0.18	0.1	-0.05	-0.2	0.02
CAGL0D05192g	-0.09	-0.06	0.07	-0.13	0.05	-0.35	0.2	-0.31
CAGL0M02343g	0.03	-0.01	0.41	-0.08	0.05	0.01	0.12	-0.02
CAGL0K00935g	-0.19	-0.14	0.35	-0.16	0.14	0.03	0.1	0
CAGL0M07315g	-0.04	-0.16	0.3	-0.07	0.09	0.01	-0.05	0.05
CAGL0M09537g	0.05	0.06	0.27	-0.2	0.24	0.13	0.21	0.03
CAGL0L05478g	0.05	-0.04	0.24	-0.05	0.16	-0.03	0.02	0.01
CAGL0F06919g	0.03	0	0.16	-0.15	0.28	0.05	0.12	0.02
CAGL0I04510g	0.04	-0.03	0.1	-0.19	0.05	-0.16	-0.1	-0.13
CAGL0I10747g	0.03	0.02	-0.07	0.38	0.44	-0.57	0.26	-0.2
CAGL0D06578g	-0.03	-0.01	0.51	-0.3	0.29	0.52	0.31	0.18
CAGL0G02057g	0.14	-0.11	0.4	0.13	0.15	0.11	0.09	0.1
CAGL0H02717g	0.01	-0.07	0.26	0.03	0.23	-0.02	0.03	0.03
CAGL0I08855g	0.05	0.06	0.24	-0.16	0.13	-0.04	0.03	-0.04
CAGL0H02365g	0.16	-0.13	0.2	0	0.21	0.14	0.09	0.12
CAGL0H07799g	0.08	0.02	0.2	-0.14	0.17	0.01	0.18	-0.01
CAGL0K04851g	0.25	0.16	0.19	-0.1	0.14	-0.04	0.13	-0.08
CAGL0D03828g	-0.04	-0.28	0.15	-0.13	0.15	0.11	0.03	0.01
CAGL0J08481g	0.19	-0.07	0.14	-0.01	0.28	0.13	-0.04	0.08
CAGL0I00770g	0.14	-0.1	0.12	0.06	0.13	-0.13	0.09	-0.13
CAGL0F01815g	0.27	0.06	0.12	-0.27	0.15	0.19	0.08	0.19
CAGL0M06699g	0.17	-0.04	0.09	-0.12	0.13	-0.01	0.06	0.02
CAGL0G01210g	0.12	-0.06	0.08	-0.02	0.17	-0.11	0.16	-0.08
CAGL0I06787g	0.06	0.08	0.04	-0.2	0.18	-0.16	0.09	-0.07
CAGL0K04323g	0.42	-0.01	0.03	0.09	-0.09	-0.28	0.05	-0.07
CAGL0F02123g	0.15	0.05	0	-0.16	0.02	-0.28	0.11	-0.31
CAGL0K05797g	0.4	-0.13	-0.01	0.02	0.06	0	0.37	-0.28
CAGL0M04939g	0.19	-0.04	-0.02	-0.07	0.17	-0.11	0.31	-0.2
CAGL0K00253g	0.01	-0.01	-0.04	-0.18	0.06	-0.34	0	-0.29
CAGL0E06424g	0.04	-0.1	-0.06	0	0.23	-0.25	0.04	-0.29
CAGL0F06369g	0.55	-0.01	-0.09	0.02	-0.07	-0.18	-0.04	-0.12
CAGL0K02563g	0.31	-0.17	-0.1	-0.02	-0.1	-0.26	-0.16	-0.26
CAGL0M03949g	0.13	0.07	0.35	-0.17	0.12	0.14	0.07	0.08
CAGL0I09856g	-0.02	-0.07	0.25	-0.06	0.36	0.16	0.01	0.08
CAGL0E02365g	0.18	0.01	0.16	0.01	0.26	0.02	0.22	0
CAGL0M03685g	0.41	0.02	0.07	0.01	0.05	-0.06	0.14	-0.08
CAGL0M13541g	0.35	-0.08	0.03	-0.04	0.02	-0.04	0.02	-0.07
CAGL0D05434g	0.46	-0.28	-0.02	-0.01	-0.02	0.15	-0.17	0.22
CAGL0F09163g	0.49	-0.13	-0.04	0.12	0.02	-0.08	0.01	-0.04
CAGL0J04004g	0.25	-0.03	0.17	0.34	0.53	0.09	0.31	-0.11
CAGL0I06204g	0.33	-0.57	-0.11	0.16	0.02	0.1	0.16	0.17
CAGL0F05929g	0.07	-0.04	0.44	-0.18	-0.1	0.08	-0.03	0.1
CAGL0K09823g	0.13	0.04	0.32	-0.09	0.07	0.02	0.35	0.09
CAGL0I06963g	-0.01	-0.09	0.21	-0.02	0.19	-0.05	0	0.04
CAGL0M03839g	0.46	-0.08	0.2	0.06	0.06	0.19	0.24	0.1
CAGL0D06160g	0.06	0.09	0.17	-0.2	0.2	-0.01	0.01	0.04
CAGL0L09603g	0.12	0.1	0.16	-0.26	0.08	-0.03	0.11	-0.14
CAGL0M10747g	0.01	0.02	0.15	-0.25	0.2	0.04	0.12	0.03
CAGL0K11132g	0.14	-0.03	0.14	-0.25	0.05	0.06	-0.03	0
CAGL0K05335g	0.03	0.05	0.12	-0.22	0.14	-0.09	-0.06	-0.05
CAGL0G03751g	0.09	0.1	0.1	-0.26	0.18	-0.02	0.18	-0.05
CAGL0M05357g	0.18	-0.1	0.08	-0.11	0.05	-0.03	-0.08	-0.05
CAGL0A02596g	0.05	0.03	0.08	-0.16	0.15	-0.14	-0.05	-0.06
CAGL0D01144g	0.26	0.03	0.07	0.04	0.08	-0.21	0.27	-0.17
CAGL0J01958g	-0.01	0.02	0.07	-0.27	0.22	-0.02	-0.02	0.04
CAGL0K09702g	0.44	-0.15	0.01	0.07	0.26	0.24	0.04	0.14
CAGL0L07128g	0.25	-0.01	-0.04	-0.09	0.12	-0.12	0.01	-0.06
CAGL0J10956g	0.19	-0.07	-0.05	-0.12	0.1	-0.12	-0.06	-0.12
CAGL0L10318g	0.28	0	-0.08	-0.18	-0.01	-0.18	-0.02	-0.12
CAGL0L01309g	0.16	-0.25	-0.09	-0.17	-0.01	-0.07	0.03	-0.06
CAGL0C04917g	-0.04	-0.16	-0.16	0.05	0.67	0.03	-0.01	0.01
CAGL0K12958g	0.78	-0.09	-0.25	0.08	0.06	0.05	0.12	-0.01
CAGL0D01430g	0.09	-0.02	0.33	-0.03	0.1	0.02	-0.08	0.14
CAGL0F05863g	0.29	-0.01	0.19	0.03	0.04	-0.05	0.11	-0.15
CAGL0M00198g	0.02	0.01	0.16	-0.18	0.29	0.09	0.1	0.07
CAGL0M13629g	0.01	-0.09	0.07	-0.17	0.31	0.1	0.04	-0.04
CAGL0E02189g	0.04	0	0.56	-0.13	-0.06	0.13	0.07	0.08
CAGL0M02365g	0.07	-0.06	0.44	-0.06	0.3	0.39	0.31	0.25
CAGL0J10098g	-0.07	-0.05	0.48	-0.01	0.38	0.31	0.15	0.18
CAGL0K08646g	-0.01	-0.03	0.39	-0.12	0.23	0.22	-0.04	0.27
CAGL0L09581g	-0.19	-0.03	0.39	0.01	0.32	0	0.12	-0.01
CAGL0C00583g	0	0.09	0.32	-0.19	0.11	-0.01	0.04	-0.02
CAGL0H10450g	0.37	0.13	0.3	-0.04	-0.02	0.02	0.11	0.28
CAGL0I04576g	0.15	-0.03	0.27	0.03	0.25	0.13	0.17	0.08
CAGL0I03916g	0	-0.1	0.27	-0.04	0.11	-0.02	0.28	0.09
CAGL0M13321g	0.21	-0.04	0.25	0.09	0.17	0.04	0.1	-0.03
CAGL0G03553g	0.04	0	0.24	-0.28	0.19	0.21	0.09	0.13
CAGL0I01122g	0.22	0.26	0.18	-0.15	0.31	0.06	-0.06	0.06
CAGL0K09592g	0.06	0.07	0.17	-0.06	0.15	-0.17	0.13	-0.2
CAGL0L04994g	0.02	0.04	0.15	-0.23	0.15	-0.03	0.02	-0.08
CAGL0H01221g	0.07	0.01	0.09	-0.2	0.02	-0.17	0.01	-0.1
CAGL0M04851g	0.31	-0.26	0.08	-0.19	-0.12	0.18	0.22	NA
CAGL0C02475g	-0.2	0.09	0.03	-0.32	0.32	-0.16	0	-0.08
CAGL0M03971g	0.21	-0.05	0.01	-0.14	-0.1	-0.23	-0.07	-0.12
CAGL0K00297g	0.32	-0.22	-0.07	0.01	-0.11	-0.19	-0.03	-0.1
CAGL0K12826g	0.06	0.02	0.2	-0.05	0.35	0.1	0.51	0.37
CAGL0J00451g	0.06	-0.42	0.19	0.16	0.17	0.14	0.23	0.09
CAGL0H07337g	0.11	-0.1	0.19	-0.09	0.18	0.13	-0.01	0.17
CAGL0J07700g	0.08	0.05	0.13	-0.29	0.19	0.1	0.17	0.09
CAGL0I07359g	0.18	-0.02	0.02	-0.23	-0.12	-0.21	0.07	-0.14
CAGL0J06088g	-0.28	0.09	0.52	-0.34	0.26	0.22	0.23	0.22
CAGL0D00440g	0.02	0.05	0.39	-0.1	0.27	0.2	0.06	0.29
CAGL0F08019g	-0.12	0.01	0.33	-0.15	0.24	0.06	0.02	0.01
CAGL0I06028g	0.16	-0.07	0.22	-0.03	0.17	0.12	-0.02	0.12
CAGL0M05379g	0.18	-0.01	0.22	-0.11	-0.07	-0.08	-0.2	0.06
CAGL0I03520g	0.01	0.15	0.22	-0.15	0.32	0.02	0.42	-0.04
CAGL0E04928g	0.15	0.07	0.18	-0.12	0.2	0.05	-0.01	0.09
CAGL0L09625g	0.14	0.14	0.18	-0.23	0.08	-0.04	-0.06	0.05
CAGL0C00715g	0.12	0.05	0.17	-0.29	-0.05	-0.05	0.16	-0.08
CAGL0E02167g	0.02	-0.08	0.16	-0.17	0.21	0.11	0.07	0.09
CAGL0D00990g	0.17	-0.02	0.14	-0.08	0.05	-0.07	0.01	0.19
CAGL0L02167g	0.25	-0.06	0.12	0.2	0.34	0.04	-0.14	0.02
CAGL0J11308g	0.25	-0.01	0.11	0.04	0.2	0	0.05	-0.06
CAGL0K06633g	0.13	0	0.11	-0.15	0.24	0.1	0	0.09
CAGL0A04785g	0.2	-0.05	0.09	-0.15	0.05	0.01	-0.01	0.01
CAGL0L11110g	0.26	-0.06	0.06	-0.02	0.01	-0.12	-0.03	-0.04
CAGL0M08866g	0.28	-0.03	0.05	-0.15	0.03	0.01	0.04	-0.05
CAGL0D01100g	0.19	-0.02	0.02	-0.03	0.17	-0.1	0.03	-0.14
CAGL0E01441g	0.25	-0.05	0.01	-0.18	0.06	0.02	0	0.02
CAGL0G02651g	0.4	0.01	-0.01	-0.09	-0.09	-0.15	-0.05	-0.12
CAGL0F01947g	0.14	-0.15	-0.01	0.03	0.18	-0.1	-0.08	-0.1
CAGL0K07117g	0.22	0.02	-0.04	-0.03	0.11	-0.23	0.03	-0.17
CAGL0G03663g	0.18	-0.05	-0.05	-0.15	0.13	-0.07	-0.14	-0.05
CAGL0K11814g	0.14	-0.15	-0.08	-0.02	0.03	-0.27	-0.05	-0.19
CAGL0B04983g	0.15	-0.06	-0.13	-0.16	0.06	-0.23	-0.05	-0.16
CAGL0D03872g	0.01	-0.09	0.3	0.01	0.19	0.05	0.01	0.02
CAGL0M10241g	-0.45	-0.54	0.1	-0.29	0.19	0.14	0.44	0.21
CAGL0G03861g	0.3	-0.08	0.06	0.09	0.15	-0.02	0.06	0.01
CAGL0M06655g	-0.12	-0.06	0.32	-0.13	0.18	0.05	0.33	-0.2
CAGL0H01529g	-0.08	0.01	0.29	-0.1	0.28	0.06	0.15	-0.1
CAGL0D00506g	-0.01	-0.06	0.28	-0.08	0.23	0.12	0.06	0.11
CAGL0K09988g	0.11	-0.12	0.27	0.03	0.12	0.07	0.04	0.09
CAGL0K00407g	-0.12	-0.1	0.26	0.06	0.24	-0.1	0.11	-0.14
CAGL0E03003g	0.29	-0.04	0.2	0.11	0.16	0.06	-0.01	0.06
CAGL0L03674g	0.23	0	0.19	-0.11	0	0.01	0.05	0.01
CAGL0J06578g	-0.01	0.12	0.19	-0.21	0.1	-0.15	0.09	-0.16
CAGL0A01089g	0.3	-0.06	0.17	0.08	0.14	0.07	0.07	0.15
CAGL0I07667g	-0.1	0.04	0.17	-0.33	0.26	0.1	-0.08	0.19
CAGL0K06853g	0.05	-0.11	0.16	-0.1	0.05	-0.05	0.07	-0.06
CAGL0M07590g	0.22	0.07	0.16	-0.12	0.17	0.08	0.09	0.09
CAGL0G06908g	-0.09	-0.17	0.16	-0.17	0.06	-0.05	0	0
CAGL0D02596g	0.1	0.19	0.16	-0.16	0.28	-0.01	0.16	-0.02
CAGL0E06182g	0.09	0.02	0.13	-0.14	0.15	-0.03	0.03	-0.04
CAGL0K07986g	0.05	0.03	0.13	-0.2	0.04	-0.13	-0.01	-0.09
CAGL0J01353g	0.13	0	0.12	-0.08	0.2	0.01	0.01	0
CAGL0J04884g	0.15	0.02	0.11	-0.13	0.23	0.08	0.05	0.08
CAGL0M07744g	0.17	-0.02	0.1	-0.17	-0.06	-0.12	0.11	-0.01
CAGL0J08272g	-0.04	-0.03	0.1	0.02	0.27	-0.18	0.15	-0.17
CAGL0M06875g	0.21	-0.03	0.06	-0.14	0.05	-0.03	-0.02	0.05
CAGL0M02673g	0.32	-0.06	0.05	0.15	0.29	0.05	0.04	0
CAGL0G06930g	0.19	-0.03	0.05	-0.09	-0.04	-0.2	0.07	-0.11
CAGL0L00451g	0.23	0.02	0.03	0.08	0.16	-0.2	-0.03	-0.12
CAGL0M12969g	0.26	-0.01	-0.01	-0.04	0.08	-0.14	-0.06	-0.08
CAGL0I08987g	0.04	-0.05	-0.01	-0.06	0.42	0.04	0.03	-0.08
CAGL0F05049g	0.05	-0.1	-0.03	-0.17	0.01	-0.22	0	-0.24
CAGL0J02706g	0.17	-0.89	-0.04	-0.23	-0.63	0.1	0.2	-0.08
CAGL0L13046g	0.14	0.1	0.35	-0.21	0.06	0.14	0.13	0.04
CAGL0H06831g	0.21	0.04	0.28	-0.03	0.19	0.15	0.15	0.1
CAGL0D04246g	0.25	-0.04	-0.01	-0.15	0	-0.09	0.1	-0.25
CAGL0F00363g	0.51	-0.41	-0.16	0.36	-0.18	-0.3	0.22	-0.31
CAGL0J05038g	-0.09	-0.01	0.52	-0.13	0.54	0.6	0.19	0.19
CAGL0K11198g	0.11	-0.03	0.22	-0.16	0.07	0.08	-0.03	0.13
CAGL0J04180g	0.17	-0.01	0.12	-0.17	0.02	-0.02	-0.15	0.03
CAGL0B01595g	0.37	-0.08	0.09	0.01	0.06	0.08	0.12	-0.03
CAGL0G02013g	-0.09	0.22	0.51	-0.17	0.45	0.31	0.03	0.18
CAGL0M09735g	0.06	0.03	0.37	-0.04	0.11	0.04	-0.05	0.14
CAGL0H05885g	-0.1	-0.05	0.33	-0.17	0.08	0.02	0	-0.01
CAGL0F02013g	0.14	0.1	0.26	-0.2	0.25	0.24	0.04	0.15
CAGL0M03817g	0.07	0.03	0.25	-0.1	0.13	0.01	0	0
CAGL0A01562g	-0.19	0.26	0.25	-0.33	0.41	0.03	0.47	0.41
CAGL0J07832g	0.24	0.04	0.22	0.05	0.13	-0.01	0.15	-0.02
CAGL0B01144g	0.13	0.1	0.2	-0.12	0.23	0.07	0.22	0.09
CAGL0M03267g	0	-0.15	0.19	-0.16	0.1	0.09	-0.05	0.04
CAGL0H09108g	0.09	0.08	0.19	-0.07	0.16	-0.08	0.05	-0.05
CAGL0D05412g	0.18	0.06	0.18	0.05	0.21	-0.05	0.02	-0.04
CAGL0I05434g	0.4	0.09	0.16	-0.11	-0.02	0.05	0.31	-0.06
CAGL0K11297g	-0.12	-0.26	0.12	-0.07	0.29	0.11	0.19	0.08
CAGL0D01386g	0.13	0.01	0.12	-0.14	0.04	-0.09	0.06	-0.07
CAGL0K01397g	0.33	0.01	0.11	-0.01	0.05	-0.02	0.05	-0.02
CAGL0D04158g	0.14	0.04	0.09	-0.02	0.24	-0.06	-0.07	-0.05
CAGL0J01936g	0.11	0.12	0.07	-0.27	0.08	-0.1	0.04	-0.06
CAGL0E02783g	0.06	-0.04	0.06	-0.11	0.14	-0.1	-0.06	-0.05
CAGL0F06061g	0.18	-0.14	0.05	-0.06	-0.02	-0.1	0.05	-0.12
CAGL0B04015g	0.04	-0.02	0.05	-0.18	0.11	-0.11	-0.06	-0.07
CAGL0I01408g	-0.26	-0.33	0.05	-0.23	-0.02	-0.18	-0.01	-0.27
CAGL0L07986g	0.1	-0.02	0.04	-0.13	0.04	-0.18	-0.06	-0.08
CAGL0C02519g	0.03	0.03	0.02	-0.07	0.3	-0.12	0.08	-0.15
CAGL0L10604g	0.17	0.07	-0.04	-0.12	0.24	-0.09	0.35	-0.14
CAGL0H08041g	0.15	-0.01	-0.05	-0.24	-0.03	-0.19	-0.05	-0.12
CAGL0C03982g	0.05	-0.46	-0.1	0.04	0.18	0.04	-0.12	0.1
CAGL0E01155g	-0.3	0.28	0.62	-0.23	0.5	0.26	0.2	0.09
CAGL0I02464g	-0.06	-0.01	0.35	-0.13	0.25	0.17	0.1	0.07
CAGL0G05511g	0.23	-0.07	0.19	0.16	0.08	-0.09	-0.01	0.01
CAGL0H09438g	0.18	0.04	0.14	-0.01	0.17	-0.04	0.11	-0.14
CAGL0G05544g	0.14	-0.03	0.13	-0.08	0.07	-0.05	-0.06	-0.04
CAGL0L03916g	0.01	-0.02	0.12	-0.14	0.16	-0.05	0.07	-0.05
CAGL0M12364g	0.05	0	0.45	-0.09	0.11	0.2	0.36	0.06
CAGL0I06875g	0.01	0.07	0.39	-0.12	0.08	0.03	0.1	0.07
CAGL0L12738g	0.01	0.05	0.34	-0.1	0.03	-0.07	-0.03	0.14
CAGL0M00660g	-0.07	0.01	0.32	-0.11	0.12	-0.03	0.16	-0.05
CAGL0H01595g	0.02	0.2	0.32	-0.18	0.17	-0.01	0.07	0.04
CAGL0G00682g	-0.05	-0.04	0.31	0.07	0.27	0	0.12	0.03
CAGL0B04059g	0.21	-0.04	0.24	0.15	0.24	0.08	-0.03	0.06
CAGL0M01562g	-0.17	-0.08	0.23	-0.09	0.22	-0.05	0	-0.06
CAGL0I07095g	0.05	0.1	0.21	-0.24	0.18	0.08	0.16	0.04
CAGL0L09801g	0.12	-0.08	0.18	-0.07	0.15	0.1	-0.03	0.07
CAGL0L05434g	0.43	-0.18	0.17	0.05	0.05	0.28	-0.2	0.25
CAGL0L05126g	0.05	0.02	0.16	-0.04	0.18	-0.09	0.02	-0.04
CAGL0K03245g	0.23	-0.11	0.13	-0.01	0.08	0.06	0.07	0.04
CAGL0K02585g	0.25	-0.02	0.06	-0.15	-0.03	-0.05	0.09	-0.09
CAGL0L06776g	0.16	-0.02	0.05	-0.28	0.01	0.02	0.22	0.02
CAGL0I02442g	0.06	0.07	0.04	-0.13	0.2	-0.14	0.04	-0.08
CAGL0F06149g	0.01	0.06	0.04	-0.22	0.17	-0.12	0.07	-0.12
CAGL0L08668g	0.15	-0.05	0.02	-0.07	0.07	-0.14	0.03	-0.04
CAGL0E06072g	0.39	-0.13	0.01	0.32	0.2	-0.09	0.16	-0.2
CAGL0K11275g	0.35	-0.05	-0.05	-0.04	0	-0.11	-0.12	-0.04
CAGL0K05489g	0.22	-0.02	-0.05	-0.17	0.1	-0.04	0.08	-0.06
CAGL0K07524g	-0.07	-0.08	0.43	-0.11	0.29	0.35	0.09	0.16
CAGL0D06182g	0.09	0.08	0.28	-0.14	0.16	0.1	0.13	0.02
CAGL0L09537g	0.12	-0.03	0.27	-0.18	0.01	0.12	0.06	0.17
CAGL0L10692g	0.05	0.1	0.22	-0.19	0.18	0.05	0.01	0.11
CAGL0A04367g	0.05	0.12	0.2	-0.17	0.12	-0.07	0	0.08
CAGL0D05654g	0.16	-0.03	0.14	-0.12	0.09	0.05	-0.01	-0.02
CAGL0M10395g	0.2	0.02	0.12	-0.15	0.1	0.06	0.02	0.06
CAGL0I01848g	0.13	-0.07	0.1	-0.05	0.13	-0.01	-0.01	-0.01
CAGL0A01980g	0.34	0.06	0	-0.01	0	-0.2	0.01	-0.17
CAGL0A04807g	0.46	0	-0.18	-0.12	-0.24	-0.33	0	-0.31
CAGL0I01078g	0.2	-0.13	0.59	0.24	0.02	0.21	0.27	0
CAGL0H04565g	0.04	0.14	0.35	-0.02	0.14	-0.08	0.18	-0.01
CAGL0L07260g	0.25	0.04	0.25	-0.05	-0.03	-0.01	0.18	-0.07
CAGL0K09856g	-0.05	0.04	0.25	-0.09	0.25	0.01	-0.05	0.08
CAGL0I03454g	-0.03	0.02	0.21	-0.17	0.19	0.03	0.12	-0.08
CAGL0I08041g	0.12	0.01	0.2	-0.23	-0.08	-0.03	0.22	0
CAGL0K06083g	0.19	0.03	0.18	-0.05	0.13	0.03	-0.02	-0.03
CAGL0H04499g	0.15	-0.05	0.17	-0.14	0.12	0.14	-0.01	0.14
CAGL0D00594g	0.12	-0.01	0.16	-0.06	0.17	0.03	0.06	0.07
CAGL0I02090g	-0.01	-0.05	0.12	-0.2	0.07	-0.06	-0.06	-0.04
CAGL0E04686g	0.15	0.03	0.11	-0.07	0.1	-0.09	0.07	-0.14
CAGL0L04884g	0.06	-0.04	0.11	-0.16	-0.06	-0.18	-0.01	-0.1
CAGL0H06391g	0.05	0.05	0.11	-0.27	0.09	-0.02	-0.02	-0.04
CAGL0F01265g	0	-0.08	0.1	-0.01	0.18	-0.12	-0.05	-0.09
CAGL0D01914g	0.08	0.05	0.09	-0.16	0.1	-0.11	0.04	-0.04
CAGL0I10648g	-0.12	-0.32	0.03	0	0.08	-0.18	0.01	-0.14
CAGL0J11704g	0.24	-0.06	-0.06	-0.1	-0.05	-0.2	0	-0.13
CAGL0M13783g	0.11	0.05	-0.07	-0.15	0.14	-0.21	0.11	-0.19
CAGL0H08624g	0.05	0.03	0.35	-0.33	-0.28	-0.07	-0.02	0.01
CAGL0M14113g	0.07	-0.11	0.17	0.07	0.17	-0.04	0.39	-0.32
CAGL0E01837g	0.38	-0.21	0.08	0.56	0.5	0.12	-0.02	-0.03
CAGL0I05214g	0.14	-0.09	0.03	-0.09	0.21	0.07	0.08	0.06
CAGL0I05390g	0.59	-0.23	-0.12	0.15	-0.14	-0.08	-0.09	-0.12
CAGL0G05247g	0.35	0.03	-0.13	-0.09	0.01	-0.2	-0.02	-0.15
CAGL0L09251g	0.17	-0.17	0.01	-0.1	0.03	0	-0.02	0.04
CAGL0L01727g	0.05	-0.11	0.3	0	0.14	0.12	0.06	0.07
CAGL0M09691g	-0.03	0.04	0.22	-0.17	0.08	-0.08	0	0.04
CAGL0H02585g	-0.03	-0.07	0.21	0.26	0.58	0.09	0.07	-0.01
CAGL0G04653g	0	0.1	0.21	-0.06	0.09	-0.22	0.07	-0.1
CAGL0L07744g	0.21	-0.1	0.2	0.12	0.09	0	0.07	-0.04
CAGL0M08646g	0.09	0.08	0.2	-0.21	0.09	0.03	0	0.11
CAGL0I04422g	0.15	0.06	0.19	-0.22	0.02	0.04	-0.02	-0.01
CAGL0J10714g	0.11	-0.06	0.15	-0.27	0.12	0.23	-0.05	0.1
CAGL0I01144g	0.12	-0.05	0.15	-0.05	0.23	0.12	0.02	0.15
CAGL0A00187g	0.2	0.02	0.13	-0.1	0.07	0	-0.03	-0.06
CAGL0I04092g	-0.07	-0.03	0.13	-0.09	0.13	-0.17	-0.1	-0.14
CAGL0H09372g	-0.07	-0.02	0.13	-0.11	0.18	-0.11	-0.09	-0.02
CAGL0A04697g	0.22	-0.07	0.12	0.06	0.08	-0.05	0.07	-0.11
CAGL0B02035g	0.13	0	0.11	-0.04	0.13	-0.07	0.08	-0.06
CAGL0D01166g	0.05	-0.04	0.11	-0.09	0.05	-0.14	0.08	-0.05
CAGL0E00869g	-0.12	-0.04	0.09	-0.35	0.12	0	0.05	0.24
CAGL0A00407g	-0.03	0.1	0.09	-0.14	0.16	-0.22	0.13	-0.08
CAGL0D03212g	0.13	-0.08	0.07	-0.1	0.07	-0.03	-0.08	0.03
CAGL0J06182g	0.13	-0.06	0.07	-0.07	0.09	-0.06	-0.13	-0.01
CAGL0F02035g	0.18	-0.14	0.03	-0.13	-0.02	-0.02	0.1	-0.06
CAGL0B00858g	0.03	-0.23	0.03	-0.05	0.11	-0.03	-0.1	0.01
CAGL0F07799g	0.24	0.03	0.03	-0.05	0.09	-0.1	0	-0.05
CAGL0G06952g	0.2	0.02	0.02	0.01	0.11	-0.18	0.05	-0.11
CAGL0K04961g	0.08	-0.07	0.02	-0.11	0.04	-0.16	0.04	-0.07
CAGL0M00462g	0.12	0	0.02	-0.06	0.04	-0.24	-0.03	-0.17
CAGL0C01551g	0.17	-0.08	-0.01	-0.21	-0.05	-0.08	0.03	-0.1
CAGL0K05115g	0.1	0.02	-0.01	-0.25	0.09	-0.07	-0.01	-0.04
CAGL0M00550g	0.18	-0.14	-0.02	0.07	0.09	-0.16	0.01	-0.08
CAGL0L02409g	0.17	-0.02	-0.03	-0.15	-0.08	-0.25	-0.08	-0.05
CAGL0K04169g	0.09	-0.02	-0.08	-0.06	0.19	-0.2	-0.02	-0.11
CAGL0I09526g	-0.02	0.05	0.29	-0.11	0.09	-0.06	0.17	-0.04
CAGL0C02013g	0.04	-0.03	0.35	0.07	0.3	0.17	0.06	0.07
CAGL0E00649g	0.28	-0.05	0.24	-0.13	0.02	0.25	-0.06	0.18
CAGL0K05093g	0.07	0.01	0.22	0	0.17	-0.02	0.02	0.02
CAGL0A02816g	0	-0.04	0.15	-0.25	0.13	0.1	0.11	0.05
CAGL0C04763g	0.37	-0.04	0.13	-0.03	-0.01	0.09	0.16	-0.01
CAGL0H06787g	0.22	-0.06	0.22	0.15	0.17	0.05	0.01	0.06
CAGL0M11594g	-0.01	0.07	0.21	-0.2	0.19	0.05	0.04	-0.06
CAGL0B04917g	0.08	0	0.16	-0.05	0.25	0.07	0.11	0.04
CAGL0L07810g	0.3	0.06	0.12	-0.05	0.01	-0.05	0.01	-0.05
CAGL0F05071g	0.16	-0.03	0.07	0.09	0.24	-0.06	0.12	-0.06
CAGL0K09746g	0.06	0.01	0.07	-0.26	0.03	-0.06	0.02	-0.01
CAGL0F07095g	0.22	0.01	0	-0.18	0.08	0	-0.08	0.07
CAGL0L05060g	0.09	-0.02	0	-0.27	-0.04	-0.13	0.01	-0.14
CAGL0E01815g	0.54	-0.3	-0.06	0.31	0.07	0.07	0.03	-0.07
CAGL0L02189g	0.26	-0.03	-0.09	-0.09	0	-0.18	0.12	-0.2
CAGL0D04466g	-0.03	0.08	0.31	-0.19	0.11	0.03	0.22	-0.04
CAGL0H03421g	0.05	0	0.25	-0.14	0	-0.03	0.14	-0.05
CAGL0L06204g	0	-0.05	0.18	-0.18	-0.06	-0.12	0.12	-0.16
CAGL0J03542g	0.16	0.05	0.17	-0.09	0.13	0.03	0.03	0.08
CAGL0G00550g	0.23	0.02	0.16	-0.19	0.08	0.17	0.06	0.12
CAGL0C01793g	-0.09	-0.19	0.09	-0.11	0.3	0.13	0.31	-0.49
CAGL0D00770g	-0.1	-0.1	0.07	0.14	0.32	-0.22	0.28	-0.2
CAGL0B00726g	0.25	0.03	-0.01	-0.21	0.15	0.1	0.41	-0.02
CAGL0M05445g	0.2	-0.15	-0.02	0.01	0.08	-0.07	-0.04	-0.06
CAGL0K12694g	0.15	-0.08	0.33	0.09	0.02	0.03	0.13	0.17
CAGL0K01529g	-0.01	-0.1	0.29	-0.12	0.26	0.3	-0.11	0.29
CAGL0M10725g	-0.04	-0.05	0.28	-0.08	0.19	0.1	0.15	0.09
CAGL0K09812g	0.06	-0.01	0.25	-0.09	0.13	0.08	0.14	0.09
CAGL0I02860g	0.03	0.03	0.23	-0.11	0.22	0.1	0.03	0.06
CAGL0C00671g	0.1	0.15	0.23	-0.11	0.34	0.17	-0.04	0.11
CAGL0L02233g	0.1	0.12	0.19	0	0.21	-0.08	0.18	-0.11
CAGL0E02315g	-0.01	0.08	0.19	0.02	0.45	0.07	0.17	0.02
CAGL0I08877g	0.03	-0.03	0.17	-0.06	0.18	0.01	0.06	0
CAGL0K05247g	0.09	-0.04	0.16	0.15	0.4	0.08	0.11	0.05
CAGL0H02233g	0.18	0.07	0.15	0.02	0.15	-0.07	0.19	-0.05
CAGL0F01507g	0.06	-0.1	0.12	-0.14	0.18	0.14	-0.02	0.11
CAGL0L03696g	0.07	-0.06	0.1	-0.17	0.03	-0.03	0.1	0.12
CAGL0H06347g	0.05	0.02	0.04	-0.15	0.19	-0.05	0.02	-0.02
CAGL0D04730g	0.02	0.07	0.32	-0.11	0.21	0.13	0.04	0.18
CAGL0M09185g	-0.15	-0.02	0.23	-0.13	0.25	0.02	0.09	0.04
CAGL0L05302g	0.12	0.02	0.12	-0.13	0.09	-0.02	0.13	-0.02
CAGL0A02673g	-0.22	0.07	0.36	-0.32	0.26	0.19	0.07	0.1
CAGL0M04499g	0.33	-0.09	0.17	0.06	0.14	0.22	0.02	0.23
CAGL0G06754g	-0.05	-0.05	0.17	-0.11	0.15	-0.02	0.01	0.03
CAGL0G09603g	0.24	0.01	0.03	-0.05	0.25	0.11	-0.06	0.21
CAGL0G06710g	0.15	-0.09	-0.01	-0.3	0.14	0.22	-0.32	0.09
CAGL0L02321g	0.09	-0.11	0.28	-0.16	0.01	0.2	-0.1	0.17
CAGL0E01793g	-0.25	-0.02	0.24	0.14	0.34	-0.24	0.1	-0.26
CAGL0M05687g	0.08	0.1	0.21	-0.18	0.07	-0.01	0.09	-0.05
CAGL0M05841g	0.09	0.07	0.17	-0.12	0.08	-0.06	0.11	-0.01
CAGL0K02189g	0.08	0.1	0.17	-0.22	0.05	-0.03	0.05	-0.12
CAGL0L11418g	-0.03	0.02	0.17	-0.19	0.11	-0.03	-0.05	0.03
CAGL0K06875g	0.07	-0.04	0.15	-0.06	0.16	0.03	-0.01	0.1
CAGL0K08690g	0.1	-0.03	0.13	-0.06	0.11	-0.02	-0.04	0.04
CAGL0D04268g	0.15	0.04	0.1	-0.07	0.13	-0.04	0.11	-0.05
CAGL0M13343g	0.05	-0.04	0.09	0.03	0.18	-0.12	0.01	-0.01
CAGL0K02255g	0.01	-0.02	0.09	-0.13	0.15	-0.05	-0.03	-0.05
CAGL0B02365g	0.25	-0.1	0.04	-0.02	0.08	0.04	-0.06	0.04
CAGL0F05027g	0.08	-0.05	0.03	-0.19	0.05	-0.05	0	-0.13
CAGL0G03179g	0.29	-0.1	0.02	-0.07	-0.02	0.01	0.03	0.03
CAGL0I04114g	0.21	-0.04	0.02	-0.06	0.04	-0.08	0.01	-0.1
CAGL0G03245g	0.27	-0.05	-0.04	0.03	0.08	-0.12	0.05	-0.06
CAGL0I04620g	0.26	-0.06	-0.05	0.02	0.01	-0.19	0.15	-0.22
CAGL0M06545g	0.37	-0.06	-0.07	-0.21	-0.2	-0.08	-0.17	0.04
CAGL0D03564g	0.22	0.06	-0.08	-0.08	0.07	-0.22	0.07	-0.12
CAGL0K12672g	0.06	-0.12	-0.09	-0.16	-0.06	-0.26	-0.04	-0.22
CAGL0G06974g	-0.17	0.14	0.36	-0.24	0.18	0.02	-0.06	-0.04
CAGL0B04323g	0.06	-0.13	0.3	0.15	0.29	0.18	0.05	0.07
CAGL0M00418g	0.2	0.21	0.34	0.04	0.28	0.13	0.5	0.03
CAGL0D00726g	0.15	0.06	0.16	0.01	0.03	-0.17	-0.05	-0.05
CAGL0H07029g	0.18	0.02	0.14	0.07	0.14	-0.07	0.02	-0.05
CAGL0L03377g	0.25	-0.02	-0.11	0.04	0.22	-0.1	-0.15	-0.05
CAGL0I04928g	0.31	0.18	0.35	0.06	0.02	0	0.27	-0.06
CAGL0J08613g	0.27	-0.14	0.31	0.16	0.2	0.32	0.09	0.21
CAGL0I09328g	0.01	-0.03	0.28	0	0.32	0.2	0.08	0.14
CAGL0E01001g	0.01	-0.02	0.27	-0.04	0.17	0.07	0.02	0.1
CAGL0L10934g	0.05	-0.01	0.23	-0.16	0.07	0.08	0.04	0.07
CAGL0H01551g	0.16	-0.06	0.22	-0.11	-0.04	0.07	0.08	0.03
CAGL0K11506g	-0.11	-0.01	0.22	-0.11	0.2	-0.01	0.12	-0.05
CAGL0H02519g	0.18	-0.07	0.12	0.07	0.21	0.07	0.11	0.05
CAGL0K05995g	0.22	-0.03	0.12	-0.09	0.05	0.07	0.05	0.04
CAGL0J02244g	-0.08	-0.13	0.12	0	0.19	-0.08	0.15	-0.11
CAGL0E02387g	0.06	-0.08	0.11	0.03	0.17	-0.05	0.29	-0.09
CAGL0C01309g	0.12	0.03	0.09	-0.14	0.04	-0.08	-0.07	-0.05
CAGL0L02475g	-0.05	-0.13	0.08	-0.04	0.06	-0.18	0.12	-0.22
CAGL0K11660g	-0.03	-0.04	0.04	-0.25	0.09	-0.05	-0.07	0.03
CAGL0M08162g	0.08	0.02	0.03	-0.04	0.12	-0.19	0	-0.11
CAGL0M01100g	0.37	0.02	0.02	0.11	0.06	-0.12	0.08	-0.1
CAGL0F05357g	0.03	0.05	0	-0.13	0.15	-0.18	-0.18	-0.17
CAGL0A01177g	0.03	0.06	0.38	-0.21	0.12	0.24	-0.02	0.17
CAGL0F09009g	-0.07	0.06	0.18	-0.35	0.21	0.17	0.1	0.12
CAGL0J05764g	-0.27	0.08	0.18	-0.38	0	-0.23	0.03	-0.06
CAGL0J10692g	0.02	-0.16	0.16	0.05	0.18	0.03	0.11	0.06
CAGL0B02167g	0.13	-0.02	0.15	0.06	0.22	0.02	0.27	-0.01
CAGL0G04543g	-0.09	0.05	0.13	-0.2	0.15	-0.1	0.13	-0.07
CAGL0F00693g	-0.03	0.09	0.11	-0.18	0.24	-0.03	0.16	-0.15
CAGL0M03201g	0.15	-0.02	0.05	-0.1	0.1	-0.02	0	-0.01
CAGL0C03223g	0.13	0.01	0.04	-0.06	0.48	0.26	0.02	0.03
CAGL0D06006g	0.18	0.01	0.02	-0.21	-0.01	-0.05	-0.01	-0.06
CAGL0B03663g	0.25	0.12	0.41	0.03	0.23	0.31	0.22	0.1
CAGL0I03014g	0.02	-0.06	0.35	-0.1	0.13	0.23	0.14	0.1
CAGL0H04389g	0.14	0.09	0.26	-0.01	0.14	0.03	0.07	-0.04
CAGL0L06116g	-0.08	0	0.24	-0.01	0.21	-0.05	0.03	0.02
CAGL0E02871g	0.07	-0.09	0.23	-0.02	0.07	0.05	-0.08	-0.01
CAGL0F01089g	0.12	0.03	0.23	-0.08	0.11	0.08	0.12	0.1
CAGL0M03575g	-0.14	0.05	0.22	-0.21	0.24	0.05	0	0.1
CAGL0J00583g	0.05	-0.04	0.21	0.05	0.13	-0.05	-0.03	0.02
CAGL0D04070g	0.05	0.02	0.21	0.06	0.32	0.07	0.2	0.05
CAGL0L01749g	-0.02	0.01	0.19	-0.1	0.17	0	0.06	-0.05
CAGL0L12056g	0.06	0	0.17	0.02	0.2	-0.02	0.06	-0.04
CAGL0C00319g	0.25	0	0.16	0.15	0.13	-0.04	0.1	-0.06
CAGL0M05225g	0.19	0.02	0.16	0.01	0.09	-0.02	0.06	-0.07
CAGL0A04389g	0.13	0.05	0.16	-0.07	0.08	-0.04	0.07	-0.03
CAGL0M08096g	0.01	-0.09	0.13	-0.19	-0.01	-0.02	0.25	0.17
CAGL0C02959g	0.14	-0.03	0.11	0.03	0.11	-0.07	0.05	-0.05
CAGL0H04103g	0.2	0.04	0.11	-0.12	0.09	0.05	0.05	0.03
CAGL0I06721g	0.06	0.19	0.08	-0.24	0.05	-0.19	0.11	-0.12
CAGL0F00935g	0.17	-0.05	0.07	0.02	0.07	-0.09	-0.02	-0.08
CAGL0L10824g	0.23	0.15	0.04	0.01	0.19	-0.13	0.06	-0.02
CAGL0I00352g	0.07	0.03	0.03	-0.19	0.11	-0.06	-0.08	-0.02
CAGL0F03311g	0.39	-0.05	-0.02	-0.02	-0.05	-0.04	-0.11	-0.04
CAGL0H00781g	0.23	-0.11	-0.04	0.08	0.2	-0.01	-0.03	0
CAGL0H07711g	0.11	0.04	-0.09	-0.2	0.04	-0.21	0.07	-0.18
CAGL0A03322g	0.48	-0.01	-0.1	-0.03	0.03	0.02	0.08	0.03
CAGL0D05368g	-0.03	0.14	0.16	-0.35	0.09	0	-0.11	0.02
CAGL0F03399g	0.42	-0.27	0.08	0.37	0.06	0.03	0	-0.05
CAGL0F05951g	0.15	0.01	0.36	0	0.13	0.21	0.2	0.22
CAGL0F08173g	0.04	0.1	0.27	-0.03	0.2	0.02	0.11	-0.02
CAGL0D02134g	0.05	-0.07	0.2	-0.08	0.15	0.13	-0.03	0.19
CAGL0H04675g	-0.21	0.03	0.18	-0.23	0.14	-0.11	-0.06	-0.11
CAGL0E05236g	0.02	-0.1	0.17	-0.02	0.08	-0.03	0.05	0.08
CAGL0H05423g	0.11	-0.07	0.15	-0.19	-0.05	0.05	-0.05	0.04
CAGL0L02695g	-0.06	0.05	0.13	-0.2	0.07	-0.13	0.12	-0.14
CAGL0B01166g	0.06	0.07	0.11	-0.14	0.08	-0.1	0	-0.09
CAGL0M11264g	0.05	0.03	0.09	-0.29	0.11	0.09	0.07	0.08
CAGL0M11220g	0.22	0	0.06	-0.14	-0.04	-0.04	-0.04	-0.05
CAGL0G01903g	0.17	-0.15	0.02	-0.11	0.11	0.14	-0.09	0.16
CAGL0B01331g	0.22	0.03	-0.02	-0.13	0.04	-0.08	-0.06	0
CAGL0K06765g	-0.16	0.15	0.4	-0.16	0.23	0.06	0.41	-0.03
CAGL0K07755g	0.13	0.02	0.36	-0.11	-0.03	0.13	0.06	0.03
CAGL0K01265g	0.02	-0.03	0.36	-0.08	0	0.07	0.2	0.1
CAGL0B03927g	-0.12	0.2	0.34	-0.2	0.16	-0.04	0.34	-0.07
CAGL0M06391g	0.08	0.07	0.29	0.1	0.17	-0.05	0	-0.03
CAGL0M07183g	0.16	-0.02	0.27	0.02	0.15	0.16	0.03	0.12
CAGL0L08228g	0.11	-0.04	0.2	-0.04	0.11	0.08	0.22	-0.01
CAGL0J00275g	-0.03	0.06	0.18	-0.25	0.13	0.05	-0.04	0.1
CAGL0K03025g	0.08	0.01	0.15	0	0.13	-0.07	0.25	-0.15
CAGL0E02145g	-0.13	-0.12	0.15	-0.13	0.21	0.06	-0.08	0.12
CAGL0K12166g	0.19	0.03	0.06	-0.08	0.06	-0.06	-0.03	0.05
CAGL0J01419g	0.08	0.01	0.06	-0.1	0.12	-0.07	-0.09	-0.06
CAGL0G06556g	0.08	0.04	0.06	-0.15	0.09	-0.08	-0.02	-0.05
CAGL0D05918g	-0.05	0	0.4	-0.01	0.22	0.17	0	0.16
CAGL0I01232g	-0.18	0.04	0.33	0.04	0.24	-0.1	0.18	-0.03
CAGL0E02717g	-0.01	0.13	0.23	-0.3	0.12	0.1	0.11	0.14
CAGL0G02101g	-0.05	-0.05	0.19	-0.05	0.29	0.12	-0.06	0.18
CAGL0L12012g	0.17	0.05	0.17	0.08	0.12	-0.08	-0.08	0.03
CAGL0H00825g	0.01	0.01	0.16	-0.14	0.12	0.01	0.19	-0.01
CAGL0L03828g	-0.32	-0.17	0.16	-0.22	0	-0.18	0.14	-0.15
CAGL0M11814g	0.08	-0.04	0.14	-0.16	0.06	0.07	0.09	0.08
CAGL0A00275g	0.04	0.03	0.14	-0.16	0.16	0.06	0.04	0.08
CAGL0M13673g	-0.15	-0.28	0.13	0.05	0.18	-0.02	0.11	-0.06
CAGL0J10450g	0.11	0.09	0.12	-0.14	0.12	-0.01	0.07	-0.01
CAGL0C03850g	0.09	0.04	0.1	0	0.26	0	0.17	0.01
CAGL0E03311g	0.1	-0.03	0.09	-0.06	0.06	-0.07	0.07	-0.07
CAGL0M13585g	0.2	-0.01	0.08	0.1	0.07	-0.15	0.09	-0.06
CAGL0K11363g	0.11	-0.01	0.08	-0.13	0.13	0.05	-0.06	0.1
CAGL0L06534g	0.03	-0.12	0.07	-0.08	0.14	0.03	-0.07	0
CAGL0I00638g	0.15	0	0.07	0.03	0.12	-0.1	0.08	-0.12
CAGL0D00902g	0.06	-0.07	0.07	-0.18	0.12	0.09	0.16	-0.02
CAGL0C05247g	0.11	-0.06	0.06	0.07	0.23	-0.02	0.06	0.02
CAGL0G05522g	0.04	0.07	0.05	-0.45	0.1	0.16	0.01	0.23
CAGL0M12254g	0.17	0	0.02	-0.12	-0.1	-0.2	-0.08	-0.16
CAGL0F04521g	0.23	0.03	0.01	-0.1	0.14	0.04	-0.21	-0.02
CAGL0F04587g	0.05	-0.03	-0.02	-0.19	0.03	-0.13	0.05	-0.11
CAGL0F06039g	0.03	0.01	-0.04	-0.25	0.16	-0.02	0.09	-0.02
CAGL0K12760g	0.2	-0.01	-0.08	0	0.12	-0.16	-0.01	-0.09
CAGL0L03762g	0.01	0.07	0.24	-0.18	0.04	-0.01	0.05	-0.01
CAGL0F08151g	0	0.03	0.15	-0.13	0.09	-0.07	0.02	-0.01
CAGL0K03575g	0.21	-0.04	0.08	-0.04	0.12	0.08	-0.06	0.07
CAGL0L11880g	0.25	-0.05	0.06	-0.01	0.09	0.05	-0.06	0.09
CAGL0K10978g	0.31	-0.15	0.1	0.06	0.13	0.22	-0.06	0.08
CAGL0F02431g	0.31	-0.18	-0.03	0.13	0.11	0.03	0.04	-0.02
CAGL0K07590g	0.07	-0.28	-0.03	-0.06	-0.06	-0.08	-0.23	0
CAGL0H06523g	-0.06	0.07	0.35	-0.03	0.28	0.13	0.04	0.11
CAGL0F00319g	-0.19	0.07	0.29	-0.3	0.05	-0.02	0.19	-0.01
CAGL0J00913g	-0.07	-0.01	0.28	-0.19	0.14	0.15	0.11	0.13
CAGL0I02486g	0.31	-0.02	0.24	0.28	0.48	0.37	0.58	0.6
CAGL0J08657g	0.02	-0.02	0.23	-0.06	0.2	0.13	0.05	-0.01
CAGL0G08173g	-0.19	0.24	0.23	-0.35	0.32	0.07	0.55	0.39
CAGL0F04411g	0.13	0.04	0.2	0.08	0.1	-0.09	0.01	-0.08
CAGL0F05467g	0.02	0.08	0.19	-0.14	0.16	0.03	0.04	0.04
CAGL0A00539g	-0.02	0.05	0.19	-0.1	0.05	-0.13	0	-0.01
CAGL0F05203g	0.06	0.01	0.17	-0.25	-0.06	0.01	0.08	-0.04
CAGL0K04015g	0.02	0.01	0.14	-0.11	0.22	0.08	-0.03	0.11
CAGL0H03927g	0.06	-0.09	0.12	-0.05	0.19	0.11	-0.02	0.1
CAGL0L04862g	-0.09	-0.06	0.12	-0.28	0.04	0.01	-0.01	0
CAGL0I05544g	0.01	0.06	0.11	-0.16	0.17	-0.01	0.16	0.02
CAGL0A00341g	0.27	-0.13	0.1	-0.09	0.04	0.23	0.18	0.08
CAGL0K02453g	-0.11	0.03	0.08	-0.28	0.18	0	0.07	0
CAGL0I01474g	0.14	-0.15	0.07	-0.03	0.13	0.12	-0.02	0.07
CAGL0E01397g	-0.05	-0.03	0.07	-0.26	0.08	-0.01	-0.11	0.06
CAGL0F06347g	0.26	-0.02	0.02	-0.06	0.05	0.01	-0.06	-0.05
CAGL0K06193g	0.2	-0.03	0.01	-0.08	0	-0.08	0	-0.03
CAGL0G00814g	0.02	0.08	0	-0.24	0.08	-0.14	-0.08	-0.03
CAGL0D00154g	0.14	-0.07	-0.02	-0.04	0.24	0.07	0.27	-0.03
CAGL0K01683g	0.09	-0.29	-0.03	0.11	0.23	0.07	0.01	-0.06
CAGL0D03784g	0.09	0.12	0.24	-0.14	0.21	0.16	0.01	-0.09
CAGL0L02827g	0.48	-0.09	-0.17	0.03	0	-0.03	0.02	0.03
CAGL0B04829g	-0.03	0.01	0.34	0.09	0.14	-0.04	0.18	-0.08
CAGL0F00649g	0.12	0.01	0.22	-0.09	0.01	0.04	0.09	-0.04
CAGL0M09317g	0.08	0.01	0.22	0.02	0.17	0.05	0.05	-0.03
CAGL0K09768g	0.18	-0.09	0.07	0.11	0.08	-0.08	0	-0.09
CAGL0F01969g	-0.05	-0.04	0.2	0.04	0.33	0.09	0.03	0.11
CAGL0M01320g	0.08	0.06	0.18	-0.19	0.06	0.06	0.02	0.09
CAGL0L04708g	0.07	-0.14	0.15	-0.08	-0.06	-0.01	0	-0.01
CAGL0H08371g	-0.02	-0.06	0.14	-0.05	0.19	0.03	0.09	0
CAGL0K11319g	0	-0.01	0.13	-0.24	0.06	0.05	-0.06	0.09
CAGL0M01452g	0.02	0.02	0.12	-0.06	0.13	-0.08	-0.01	-0.06
CAGL0M08844g	-0.05	-0.02	0.12	-0.21	0.01	-0.08	0.06	-0.08
CAGL0J03586g	0.03	0	0.07	-0.2	-0.03	-0.12	-0.08	-0.08
CAGL0I01188g	0.03	0	0.07	-0.11	0.12	-0.06	0.01	0.03
CAGL0I10967g	0.12	0.13	0.06	-0.04	0.04	-0.26	-0.01	-0.19
CAGL0L09086g	0.26	0.05	0.02	-0.01	0.14	-0.01	-0.08	0.04
CAGL0M06413g	0.16	-0.01	0.02	-0.08	0.07	-0.05	0	0
CAGL0G08426g	0.21	0.05	0.02	-0.05	0.01	-0.15	0.06	-0.09
CAGL0H10186g	0.1	0.02	0.01	-0.12	0.06	-0.12	0	-0.07
CAGL0K03949g	0.39	0.1	-0.15	-0.04	0.05	-0.16	0.14	-0.19
CAGL0C04933g	-0.05	0.07	0.3	-0.25	-0.09	-0.05	0.03	0.21
CAGL0J02970g	0.19	-0.02	0.16	0.07	0.15	0.06	0.13	-0.05
CAGL0A00957g	0.14	-0.01	0.12	-0.1	-0.02	-0.04	0.01	-0.01
CAGL0L10164g	0.15	0	0.1	-0.1	0.23	0.19	0.02	0.11
CAGL0M09064g	0.14	0.01	-0.01	-0.18	0.04	-0.05	-0.03	-0.04
CAGL0I09240g	-0.31	-0.02	0.38	-0.21	0.26	0.18	0.07	0.12
CAGL0K10186g	0.05	0.1	0.36	-0.13	0.05	0.11	0.12	0.07
CAGL0M12925g	-0.01	0.03	0.35	-0.04	0.18	0.15	0.06	0.1
CAGL0M09911g	-0.11	0.04	0.3	-0.25	0.09	0.11	0.05	0.06
CAGL0L00825g	0.1	-0.11	0.24	-0.08	0.16	0.31	0.28	0.12
CAGL0K01441g	-0.02	0.08	0.22	-0.31	0.13	0.18	0.31	0.07
CAGL0E05830g	0.28	0.14	0.21	0.09	0.14	0.02	0.08	0.03
CAGL0I04180g	0	0.08	0.21	-0.23	0.12	0.1	0.12	0.03
CAGL0L04070g	0.18	0.22	0.18	0.05	0.1	-0.19	0.28	-0.14
CAGL0A01067g	-0.09	-0.02	0.18	-0.23	0.13	0.09	-0.07	0.07
CAGL0H06897g	-0.05	-0.1	0.16	-0.12	0.17	0.12	0.11	0.16
CAGL0M07447g	-0.03	0.01	0.16	-0.07	0.13	-0.06	-0.01	-0.05
CAGL0J05544g	0.12	0.09	0.13	-0.05	0.13	-0.04	0.17	-0.1
CAGL0K11638g	0.24	-0.17	0.12	-0.11	-0.11	0.15	0.14	0.07
CAGL0B01529g	0.15	-0.07	0.12	0	0.01	-0.03	0.01	-0.1
CAGL0K07392g	-0.15	-0.15	0.12	-0.08	0	-0.18	-0.08	-0.07
CAGL0K02277g	0.24	-0.05	0.05	-0.01	0.14	0.11	-0.02	0.13
CAGL0I08459g	0.08	0.05	0.05	-0.03	0.13	-0.14	0.01	-0.13
CAGL0B03223g	0.36	0.06	0.02	-0.27	-0.05	0.16	0.1	-0.06
CAGL0M02563g	0.08	-0.12	0.02	-0.08	0.09	0.01	0.04	-0.08
CAGL0L05038g	-0.01	0	0.02	-0.27	0.12	0.02	0.06	-0.03
CAGL0A02926g	0.1	0.01	0	-0.12	-0.12	-0.29	0.05	-0.21
CAGL0I10879g	0.22	0.03	-0.02	0.07	0.12	-0.16	0.13	-0.22
CAGL0I08239g	0.15	0.04	-0.03	-0.19	-0.1	-0.21	-0.06	-0.15
CAGL0K03839g	0.33	-0.02	-0.05	0.02	0.07	-0.03	0.23	-0.13
CAGL0E06270g	0.23	0.17	-0.07	-0.06	0.18	-0.15	0.22	-0.19
CAGL0K07832g	-0.35	-0.49	0.31	0.27	0.51	0.31	0.57	0.51
CAGL0I00418g	0.04	-0.43	0.26	0.24	-0.16	-0.05	-0.16	0.05
CAGL0H02849g	-0.06	0.07	0.25	-0.22	0.12	0.08	0.42	-0.21
CAGL0M04477g	0.01	-0.1	0.24	-0.14	0.08	0.19	0.02	0.12
CAGL0H10120g	0.07	0.04	0.15	0.04	0.29	0.05	0.11	0.01
CAGL0E04620g	0.3	-0.22	0.05	0.1	-0.1	0	-0.15	-0.03
CAGL0E01991g	-0.25	0.21	0.29	-0.41	0.17	0.04	0.17	0.07
CAGL0D02970g	0.05	-0.02	0.12	-0.1	0.06	-0.02	0.14	-0.05
CAGL0M10681g	-0.09	-0.14	0.11	-0.31	-0.05	0.05	0.09	0
CAGL0M12903g	0.05	-0.05	0.1	-0.04	0.11	-0.02	0.18	-0.03
CAGL0J09394g	-0.02	-0.03	0.08	-0.11	0.23	0.06	0.18	0.04
CAGL0J09020g	0.3	-0.02	0.04	0.06	0.06	-0.01	-0.08	0.09
CAGL0K06325g	0.17	-0.09	-0.02	0.03	0.1	-0.06	0.11	-0.08
CAGL0B03861g	0.03	0.08	0.46	-0.04	0.16	0.24	0.18	0.24
CAGL0F04851g	0.05	-0.04	0.29	0.1	0.21	0.12	-0.04	0.1
CAGL0H03135g	0.21	-0.05	0.28	-0.2	-0.14	0.23	0.12	0.17
CAGL0M13101g	0.18	-0.12	0.25	0.16	0.23	0.25	0.01	0.2
CAGL0D01210g	0.13	0.07	0.23	-0.02	0.2	0.14	0.1	0.15
CAGL0G03531g	0.06	-0.04	0.18	-0.09	0.11	0.11	0.23	0.03
CAGL0E01243g	-0.03	0.11	0.18	-0.09	0.16	-0.08	-0.07	-0.19
CAGL0L06974g	-0.06	-0.06	0.14	-0.03	0.3	0.1	-0.02	0.02
CAGL0L09185g	0.21	-0.04	0.11	0.02	0.02	-0.01	0.19	-0.02
CAGL0H08349g	0.05	0.12	0.11	-0.32	0	-0.01	-0.01	0.01
CAGL0L10538g	0.03	-0.07	0.09	0.01	0.07	-0.12	0.03	-0.11
CAGL0E01683g	0.07	0.02	0.08	-0.09	0.08	-0.07	-0.03	-0.02
CAGL0G07271g	0	-0.05	0.06	-0.13	0.11	-0.02	-0.27	0.12
CAGL0C00605g	0.26	0.02	0.05	-0.12	-0.07	-0.03	-0.04	-0.05
CAGL0H04015g	0.05	-0.03	0.05	-0.2	0.12	0.08	0.34	0
CAGL0K04807g	0.03	0.01	0.05	-0.14	0.01	-0.15	-0.01	-0.06
CAGL0J02882g	0.07	0.01	0.04	-0.01	0.27	0.01	0.09	-0.05
CAGL0G07865g	0.14	-0.02	0	-0.11	-0.04	-0.14	0.04	-0.07
CAGL0F09207g	0.13	-0.11	-0.03	0.08	0.11	-0.13	0.21	-0.13
CAGL0I08745g	0.26	0	-0.06	-0.07	-0.07	-0.17	0.03	-0.11
CAGL0G05698g	0.24	-0.09	-0.07	0.24	0.33	-0.02	-0.06	-0.03
CAGL0K04631g	0.29	-0.1	-0.09	0.09	0.06	-0.1	-0.18	0
CAGL0F08767g	0.14	0.03	0.26	-0.3	0.11	0.41	0.26	0.1
CAGL0H02497g	0.05	-0.02	0.09	-0.3	0.1	0.19	0.08	0.09
CAGL0C04433g	-0.01	-0.02	0.07	-0.01	0.24	-0.04	-0.04	0.03
CAGL0G04587g	0.01	0.1	0.05	-0.29	0.07	-0.05	-0.03	0
CAGL0D06600g	0.23	-0.1	0.03	0.08	0.11	0.02	-0.05	-0.03
CAGL0G07337g	0.11	-0.11	0.24	0.14	0.29	0.24	0.09	0.19
CAGL0L03608g	0.16	-0.07	0.18	0.04	0.09	0.1	-0.05	0.06
CAGL0L01529g	0.27	-0.03	0.02	0.1	-0.03	-0.17	-0.07	-0.08
CAGL0H06611g	0.17	-0.12	-0.15	0.09	0.03	-0.28	0.02	-0.25
CAGL0M11880g	0.03	0	0.25	0.06	0.19	0.05	0.07	0.11
CAGL0E00715g	0.1	0	0.24	0.08	0.28	0.18	-0.03	0.15
CAGL0K11044g	0.11	-0.13	0.17	0.18	0.19	0.06	0.13	0.05
CAGL0J03608g	0.08	-0.03	0.15	0.03	0.17	0.04	-0.06	0.02
CAGL0H04763g	0.13	-0.13	0.07	-0.06	-0.04	-0.01	-0.15	-0.03
CAGL0J07414g	0	0	0.04	-0.23	0.01	-0.08	-0.03	-0.04
CAGL0K05555g	0.07	-0.07	-0.01	-0.26	-0.11	-0.08	-0.04	0.02
CAGL0B01507g	0.04	-0.1	-0.08	-0.02	0.2	-0.08	-0.01	-0.03
CAGL0K06281g	-0.21	-0.01	0.27	-0.09	0.22	0.02	0.07	0.06
CAGL0I03366g	-0.33	0.12	0.26	-0.44	0.2	0.09	-0.08	0.15
CAGL0J05060g	0.01	-0.01	0.22	-0.14	0.13	0.15	-0.03	0.17
CAGL0A01045g	-0.03	-0.09	0.19	0.16	0.51	0.24	-0.12	0.1
CAGL0G06028g	-0.21	-0.22	0.18	-0.03	0.24	0.1	0.01	0.05
CAGL0K01749g	0.05	-0.02	0.17	0.11	0.23	0	-0.01	0.01
CAGL0L01969g	-0.08	0.01	0.16	-0.15	0.05	-0.09	0.15	-0.07
CAGL0F01881g	0.04	0	0.13	-0.02	0.13	-0.04	0.01	-0.06
CAGL0H03905g	0.08	-0.04	0.12	0.06	0.17	-0.01	0.06	-0.04
CAGL0J02442g	0.07	-0.12	0.1	0.1	0.19	0.02	0.06	0.01
CAGL0K04653g	0.1	0.03	0.1	-0.1	0.06	-0.03	0.01	0.04
CAGL0H01573g	0.06	0.12	0.1	-0.21	-0.05	-0.16	0.05	-0.12
CAGL0J01199g	0.25	-0.05	0.09	0.04	-0.02	-0.03	-0.05	-0.02
CAGL0H08690g	0.15	0.05	0.07	-0.16	-0.11	-0.14	0.05	-0.05
CAGL0K03377g	0.08	0	0.06	-0.11	0.07	-0.04	-0.06	0.02
CAGL0F08305g	0.3	-0.09	0.05	-0.01	-0.06	0.03	0.1	0.13
CAGL0J03168g	0.11	-0.01	0.04	-0.06	-0.02	-0.16	-0.04	-0.13
CAGL0D04994g	0.2	0.08	0.04	-0.11	0	-0.09	0.12	-0.08
CAGL0G03729g	0.21	-0.15	0.01	0	-0.05	-0.04	-0.18	-0.03
CAGL0J08228g	0.2	-0.04	0.01	0.01	0.07	-0.05	0.05	-0.03
CAGL0F03971g	0.15	0.05	0	-0.14	-0.04	-0.16	-0.04	-0.17
CAGL0C05489g	0.21	-0.07	-0.01	-0.04	-0.05	-0.1	-0.1	-0.07
CAGL0K06897g	0.2	-0.15	-0.02	0.01	0.03	-0.01	-0.01	0
CAGL0C01529g	-0.01	-0.02	-0.03	-0.22	0.17	0.01	0	0.03
CAGL0E04488g	0.24	0.05	-0.05	-0.13	0	-0.09	-0.02	0
CAGL0G04983g	-0.1	0.04	0.18	-0.29	0.23	0.2	0.24	0.06
CAGL0B01463g	-0.13	-0.02	0.38	-0.09	0.2	0.21	0.1	0.16
CAGL0L12320g	-0.05	-0.11	0.33	0.04	0.26	0.26	0.06	0.16
CAGL0M11528g	0	-0.07	0.22	-0.07	0.08	0.09	0.03	0.1
CAGL0L12650g	0.17	-0.12	0.02	-0.01	0.02	-0.01	0	0.04
CAGL0E05258g	-0.25	0.03	0.37	-0.16	0.14	0.04	0.12	0.01
CAGL0C03608g	-0.08	-0.09	0.27	-0.03	0.24	0.2	-0.1	0.07
CAGL0L04576g	-0.04	0.03	0.22	-0.11	0.14	0.05	-0.04	0.05
CAGL0I05786g	-0.06	-0.06	0.18	-0.09	0.12	0.04	0	0.02
CAGL0I02772g	0.16	0.03	0.17	0.02	-0.01	-0.08	0.2	-0.02
CAGL0K11341g	0.13	-0.03	0.16	0.08	0.17	0.06	0.16	0.05
CAGL0K01485g	-0.02	0.01	0.15	-0.09	0.19	0.05	0.03	0.06
CAGL0G09295g	-0.06	0	0.12	-0.16	0.17	0.04	0.09	-0.03
CAGL0H09152g	0.07	-0.06	0.07	-0.07	0.2	0.12	-0.13	0.11
CAGL0F08107g	0.18	-0.07	0.06	0.25	0.21	-0.08	0.06	-0.14
CAGL0K11110g	0.2	0.05	0.06	-0.18	0.07	0.11	-0.07	0.09
CAGL0M03157g	0.02	0	0.06	-0.14	0.09	-0.04	-0.03	-0.01
CAGL0E02915g	0.42	-0.08	0.02	0.13	0.02	0.06	0.02	0.08
CAGL0M11792g	0.29	0.03	0.01	-0.01	0.11	0.04	-0.02	0.05
CAGL0L06270g	0.17	0	0.01	0	0.17	0	0.16	-0.14
CAGL0A03883g	0.17	-0.18	0.27	0.09	0.08	0.26	0.26	0.07
CAGL0H10296g	0.14	-0.01	0.22	0.03	0.04	0.03	0.12	-0.04
CAGL0I06578g	0.1	0	0.22	0	0.06	0.03	0.03	0.03
CAGL0I06556g	0.13	-0.03	0.19	0.05	0.06	0.01	0.06	0.04
CAGL0K12210g	0.15	-0.09	0.18	0.11	0.11	0.07	0.16	0.02
CAGL0J07238g	-0.06	0.28	0.15	-0.18	0.47	0.11	0.74	0.65
CAGL0G04675g	0.28	-0.03	0.09	0.08	0.06	0.03	0.33	-0.12
CAGL0L03311g	-0.05	-0.13	0.09	-0.03	0.24	0.09	0.16	-0.02
CAGL0L03135g	0.04	-0.01	0.09	-0.02	0.15	-0.04	0.05	-0.08
CAGL0F04257g	-0.02	0.03	0.09	-0.14	0.14	-0.03	-0.02	-0.01
CAGL0J11022g	0.04	0.11	0.09	-0.12	-0.04	-0.25	0.08	-0.18
CAGL0M04257g	0.04	0.04	0.06	-0.13	0	-0.16	0.02	-0.12
CAGL0I02750g	0.12	0.05	0.05	-0.08	0.05	-0.1	-0.01	-0.07
CAGL0G01100g	0.06	0.01	0.05	-0.05	0.23	0.03	0.01	0.06
CAGL0K06699g	0.31	-0.09	0.04	0.07	0.05	0.07	-0.07	0.1
CAGL0K01463g	-0.01	-0.14	0.04	0.01	0.15	-0.04	0.02	-0.1
CAGL0G01947g	0.22	-0.09	0.02	-0.16	0.03	0.17	-0.12	0.17
CAGL0K02079g	0.07	-0.07	-0.02	-0.04	0.01	-0.18	0.04	-0.15
CAGL0J11572g	0.27	0.06	-0.03	-0.07	-0.12	-0.22	0.14	-0.26
CAGL0G02145g	0.22	0.04	-0.04	-0.03	0.02	-0.16	0.01	-0.11
CAGL0F03025g	0.12	0.01	-0.04	0	0.07	-0.21	-0.03	-0.11
CAGL0M12408g	-0.36	0.09	0.56	-0.2	0.13	0.1	0.52	0.05
CAGL0J05588g	0.11	0.13	0.54	-0.05	0.14	0.37	0.49	0.26
CAGL0D06270g	0.06	-0.02	0.27	0.04	0.18	0.15	0.1	0.1
CAGL0G04059g	0.24	0.06	0.06	-0.03	0.16	0.09	0.15	0.06
CAGL0D05324g	0.27	0.03	0	-0.07	-0.09	-0.12	-0.04	-0.07
CAGL0A02992g	0.13	0	0.27	0.12	0.11	0.05	0.05	0.02
CAGL0H01309g	-0.02	-0.08	0.23	0.13	0.32	0.14	0.07	0.05
CAGL0A03014g	0.1	0.06	0.2	0	0.11	0.01	-0.04	0.02
CAGL0A00253g	-0.07	-0.01	0.19	-0.05	0.14	-0.02	0.3	-0.02
CAGL0G01969g	-0.11	0.06	0.19	-0.13	0.18	-0.01	0.04	0.03
CAGL0K02915g	0.23	-0.01	0.17	0.04	0.04	0.07	0.12	0.09
CAGL0M01474g	0.12	-0.08	0.17	-0.13	-0.09	0.07	0.01	0.08
CAGL0J09790g	-0.02	-0.11	0.16	0.11	0.32	0.12	0.01	0.02
CAGL0I01936g	0.12	-0.29	0.08	-0.35	-0.31	0.19	0.01	0.04
CAGL0B03443g	0.02	-0.05	0.08	0.05	0.13	-0.11	-0.04	-0.04
CAGL0K01419g	0.12	0.01	0.06	-0.06	0.03	-0.08	0.09	-0.08
CAGL0L11704g	0.07	0.1	0.06	-0.23	0.02	-0.06	-0.07	-0.06
CAGL0M07249g	0.1	-0.02	0.04	-0.07	0.05	-0.06	-0.02	-0.01
CAGL0M13607g	0.17	0.07	0	-0.01	0.09	-0.14	0.01	-0.1
CAGL0A02530g	-0.01	-0.1	-0.01	-0.01	0.26	0.01	0.08	-0.03
CAGL0M03355g	0.1	-0.06	-0.04	-0.03	0.05	-0.14	0	-0.11
CAGL0M03025g	0.19	-0.01	-0.09	0.06	0.23	-0.06	-0.05	-0.01
CAGL0K03333g	0.3	0.03	-0.2	-0.18	-0.11	-0.2	-0.06	-0.13
CAGL0G03333g	-0.05	0.03	0.29	-0.08	0.01	-0.04	0.08	-0.01
CAGL0J03245g	0.08	0.13	0.21	-0.07	0.06	-0.05	0.19	-0.07
CAGL0K04829g	0.17	0.16	0.17	-0.07	-0.06	-0.15	0.1	-0.06
CAGL0L06490g	0.03	-0.01	0.11	-0.02	0.08	-0.09	-0.05	-0.06
CAGL0L05632g	0.28	0.05	0.05	-0.09	-0.02	0.01	-0.04	0.01
CAGL0G01342g	0.21	-0.05	-0.01	-0.05	0.03	-0.01	-0.08	-0.04
CAGL0F06699g	0.13	0.01	-0.16	-0.21	0.19	0.02	-0.03	-0.02
CAGL0E03806g	0.31	-0.05	-0.02	0.03	-0.02	-0.05	0.07	0
CAGL0B03839g	0.16	-0.27	0.15	0.18	0.03	0.1	-0.06	0.12
CAGL0F03905g	0.23	-0.02	0.07	-0.1	0	0.09	0.07	0.06
CAGL0C03597g	-0.02	-0.1	0.07	-0.13	0.2	0.15	0	-0.03
CAGL0J09592g	-0.02	-0.05	0.26	-0.08	0.16	0.2	0.08	0.19
CAGL0I08789g	-0.01	0.06	0.23	-0.12	0.06	0.01	0.07	0.01
CAGL0J05016g	0	0.02	0.2	0.01	0.22	0.06	0.06	0.1
CAGL0I02838g	0.08	0.05	0.08	-0.12	0.17	0.07	-0.05	0.03
CAGL0K07271g	0.04	0.03	0.07	-0.13	0	-0.12	-0.06	-0.04
CAGL0M02255g	0.19	0.05	0.06	-0.07	0.08	0.02	0.04	0.06
CAGL0H05357g	0.09	-0.02	0.06	-0.1	0.02	-0.04	0.03	0
CAGL0G01386g	0.07	0	0.05	-0.14	0.05	-0.02	-0.02	0.04
CAGL0L02805g	-0.03	-0.26	0.04	0.08	0.07	-0.07	0.04	-0.06
CAGL0I08349g	0.09	0	0.02	-0.21	-0.09	-0.1	-0.05	0.02
CAGL0J03102g	0.1	-0.07	0	-0.15	0.09	0.08	-0.1	0.09
CAGL0G02497g	0	0	0	-0.13	-0.05	-0.25	-0.09	-0.17
CAGL0I05984g	0.2	-0.07	-0.01	0.02	0.05	-0.04	-0.01	-0.02
CAGL0J04994g	0.12	0.06	-0.05	-0.09	-0.04	-0.27	-0.09	-0.1
CAGL0K10296g	0.07	0.15	0.35	-0.05	0.17	0.16	0.07	0.21
CAGL0K06545g	-0.11	-0.01	0.29	-0.12	0.14	0.12	-0.01	0.15
CAGL0M08624g	0.09	-0.01	0.26	-0.02	0.1	0.15	0	0.18
CAGL0E01199g	0.05	0.03	0.22	-0.06	0.19	0.16	0.02	0.06
CAGL0C02651g	0.15	0.01	0.18	0.12	0.18	0.05	0.06	0.04
CAGL0J11814g	0.09	0.01	0.17	-0.01	0.04	-0.03	0.08	-0.02
CAGL0I06666g	-0.04	0.04	0.17	-0.03	0.06	-0.15	0	-0.11
CAGL0F08327g	0.05	0.06	0.13	-0.15	0.09	0.03	0.06	-0.04
CAGL0J04290g	0.22	-0.04	0.09	-0.02	-0.02	0.02	0.08	0.14
CAGL0H03531g	0.01	-0.02	0.09	0.1	0.3	-0.01	0.16	0
CAGL0I02156g	0.01	-0.04	0.08	-0.11	0.11	0.02	-0.03	0.06
CAGL0B02431g	0.37	0.03	0.07	0.27	0.32	0.13	-0.05	0.04
CAGL0D02068g	0.09	-0.09	0.05	-0.05	0.07	0.02	-0.02	-0.04
CAGL0H01947g	-0.06	-0.02	0.48	0.11	0.28	0.29	0.21	0.13
CAGL0D01518g	0.06	-0.04	0.3	-0.03	0.01	0.12	-0.06	0.09
CAGL0L02277g	0.07	-0.01	0.09	-0.1	0.08	0.03	0.01	0.05
CAGL0J07546g	0.01	0	0.08	-0.05	0.08	-0.1	-0.02	-0.04
CAGL0M05885g	-0.02	-0.09	0.06	-0.28	-0.11	-0.02	-0.01	0.1
CAGL0F08943g	0.35	0.06	-0.03	0.11	0.15	-0.02	0.16	-0.06
CAGL0J04488g	0.26	0.03	-0.06	-0.01	0	-0.14	0.06	-0.14
CAGL0M12793g	0.26	-0.02	-0.09	0.19	0.14	-0.18	-0.13	-0.03
CAGL0I04202g	0.2	0.02	-0.11	-0.11	-0.09	-0.23	-0.02	-0.17
CAGL0H02035g	0.02	-0.05	0.29	-0.09	0.16	0.29	0.03	0.13
CAGL0B02387g	0.17	-0.08	0.23	-0.04	-0.02	0.18	0.22	0.01
CAGL0D04394g	0.02	0.24	0.23	-0.19	0.12	0	0.29	-0.16
CAGL0F02959g	0.15	0.04	0.19	-0.02	0	0	-0.01	0.01
CAGL0J00671g	0.24	0	0.18	0.11	0.02	0.01	-0.02	0
CAGL0M07513g	0.11	-0.08	0.18	0.13	0.16	0.08	0	0.05
CAGL0M08690g	0.07	0	0.15	-0.05	0.07	0.02	0.12	0.06
CAGL0J10054g	0.07	0.06	0.15	-0.11	0.04	-0.01	0.04	0
CAGL0I00506g	0.08	0.04	0.12	-0.12	0.1	0.06	-0.06	0.09
CAGL0H05181g	0	0.06	0.12	-0.1	-0.06	-0.22	0.04	-0.1
CAGL0K00825g	0.01	-0.22	0.09	0.15	0.23	0.08	0.36	-0.09
CAGL0K03113g	0.1	-0.24	0.08	0.06	-0.06	-0.02	-0.12	0.01
CAGL0J10736g	0.18	0.02	0.08	0.02	0.08	-0.02	0.16	-0.1
CAGL0M03795g	0.2	0.05	0.06	-0.29	0	0.18	-0.07	0.19
CAGL0J08756g	0.08	0.06	0.02	-0.07	0.08	-0.13	0.03	-0.07
CAGL0D00352g	0.28	0.02	0	0.19	0.12	-0.13	-0.02	-0.09
CAGL0K05137g	0.12	-0.16	-0.01	0.16	0.15	-0.06	-0.05	-0.04
CAGL0L07722g	0.1	-0.39	-0.07	0.14	0.08	0.04	0.05	0.2
CAGL0H05005g	0.24	-0.08	-0.08	-0.02	-0.02	-0.08	0.04	-0.09
CAGL0K06721g	0.17	0.06	-0.08	-0.13	0.05	-0.11	-0.13	-0.03
CAGL0L07546g	0.35	-0.15	-0.25	0.14	0.07	-0.14	0.12	-0.17
CAGL0K07546g	0.21	0.16	0.27	-0.13	-0.1	0.03	0.26	-0.08
CAGL0F01727g	-0.22	0.06	0.24	-0.3	0.24	0.18	0.1	0.32
CAGL0G07205g	0.1	0.08	0.21	0.07	0.06	-0.1	0.04	-0.01
CAGL0C00363g	0.14	-0.13	0.18	0.09	0.22	0.26	-0.01	0.13
CAGL0H02541g	-0.06	-0.1	0.14	-0.01	0.3	0.17	0.16	0.16
CAGL0M05929g	0.05	-0.04	0.12	0.03	0.15	0.01	0.27	-0.09
CAGL0I05522g	0.05	-0.02	0.09	-0.19	-0.16	-0.13	-0.12	-0.06
CAGL0F00583g	-0.05	-0.09	0.03	-0.15	0.09	-0.01	-0.11	0.02
CAGL0K05533g	0.19	0.04	0.01	-0.21	-0.08	-0.03	-0.02	-0.16
CAGL0E03454g	-0.04	0.03	-0.04	-0.25	0	-0.18	0.07	-0.16
CAGL0D03432g	-0.3	-0.21	0.28	-0.12	0.09	0.08	-0.03	0.01
CAGL0J11000g	-0.07	-0.05	0.23	-0.03	0.07	0	0.12	-0.03
CAGL0J08547g	0.18	0.08	0.2	0.03	0.14	0.1	0.02	0.14
CAGL0F00407g	0.03	-0.17	0.18	-0.08	0.06	0.21	0.16	0.09
CAGL0K03663g	0.2	0.12	0.18	-0.01	0.03	-0.01	0.19	0.26
CAGL0L12958g	0.07	0.07	0.17	-0.03	0.08	-0.03	0.01	0
CAGL0F07931g	0.04	0.18	0.17	-0.08	0.17	-0.03	0.14	-0.03
CAGL0K02651g	0.04	0.13	0.14	-0.25	0.05	0.04	0.03	0.1
CAGL0H07359g	0.05	-0.03	0.11	0.09	0.11	-0.1	0.03	-0.06
CAGL0I09614g	0.03	0.06	0.11	-0.06	0.07	-0.1	0.08	-0.06
CAGL0K08580g	0.12	-0.01	0.08	-0.02	0.06	-0.02	0.19	-0.14
CAGL0B03311g	0.2	-0.04	0.06	-0.02	0.14	0.15	0.01	0.12
CAGL0L03960g	0.11	-0.05	0.03	-0.04	-0.02	-0.1	-0.01	-0.05
CAGL0K03971g	0.11	0.06	0.01	-0.17	0.01	-0.07	0.01	-0.02
CAGL0J01529g	0.26	0.03	-0.03	-0.07	-0.03	-0.07	-0.1	-0.04
CAGL0F00825g	0.37	-0.18	-0.3	0.04	-0.06	-0.16	-0.02	-0.09
CAGL0I01364g	-0.13	0	0.46	-0.07	0.35	0.44	0.02	0.22
CAGL0G01694g	0.1	0.29	0.24	-0.15	0.06	-0.05	0.18	-0.16
CAGL0E01331g	-0.02	-0.06	0.2	0.04	0.31	0.2	-0.04	0.16
CAGL0E01529g	0.17	-0.06	0.17	0.01	0.12	0.2	0.09	0.22
CAGL0H07623g	0.16	0.06	0.13	-0.08	0.04	0.04	0.1	0.05
CAGL0A02651g	0.12	0.01	0.09	-0.05	0.04	-0.02	0.05	-0.02
CAGL0C03894g	-0.02	0.04	0.06	-0.1	0.13	-0.08	0.03	-0.02
CAGL0M06039g	0.11	0.15	0.03	-0.25	-0.03	-0.1	0.1	-0.15
CAGL0K09350g	0.33	0.19	0.02	-0.12	-0.02	-0.05	0	0.06
CAGL0I06292g	0.36	-0.16	0.01	0.16	-0.04	0.02	0	0.01
CAGL0A04235g	0.09	-0.01	-0.02	-0.12	-0.02	-0.13	-0.09	-0.09
CAGL0D03520g	0.07	-0.01	-0.02	-0.05	0.16	-0.04	-0.03	-0.02
CAGL0K06941g	0.11	-0.01	-0.04	-0.05	-0.03	-0.21	-0.14	-0.12
CAGL0I02134g	0.17	0.11	0.18	-0.11	-0.01	0.03	0.41	-0.11
CAGL0L00539g	0.29	-0.05	-0.02	0.16	0.06	-0.09	0.29	-0.08
CAGL0H06633g	0.3	-0.01	-0.05	0.01	0.09	0.04	-0.08	0.09
CAGL0M11572g	-0.23	0.14	0.42	-0.13	0.21	0.09	0.11	0.04
CAGL0M08536g	0.13	-0.03	0.36	0.12	0.28	0.38	0.14	0.22
CAGL0G01562g	-0.1	-0.01	0.29	-0.16	0.03	0.09	0.03	0.04
CAGL0B03597g	-0.07	-0.21	0.19	0.04	0.24	0.23	-0.17	0.17
CAGL0H08239g	0.08	0.03	0.15	-0.02	0.11	0.03	0.04	0.03
CAGL0H07975g	-0.2	-0.04	0.14	-0.21	0.08	-0.03	0	0
CAGL0H05995g	0.12	-0.07	0.13	-0.05	0.03	0.1	0.11	0.2
CAGL0M00440g	0.21	-0.06	0.11	0.09	0	-0.01	-0.06	0
CAGL0L08272g	-0.01	0.09	0.1	-0.21	0.01	-0.08	-0.04	0.01
CAGL0L05698g	0.21	-0.04	0.02	-0.05	-0.05	-0.03	0.02	-0.04
CAGL0L03091g	0.17	-0.01	0.01	-0.16	-0.02	0.03	-0.11	0
CAGL0M08910g	0.12	-0.01	0.01	-0.08	0.1	0.02	0.05	-0.05
CAGL0L11022g	0.11	0.04	-0.1	-0.19	0.05	-0.09	-0.04	-0.06
CAGL0I00330g	0.28	0	-0.12	-0.07	-0.1	-0.17	0.14	-0.15
CAGL0C05577g	0.14	0	-0.13	-0.14	-0.08	-0.23	-0.09	-0.3
CAGL0J07964g	0.14	-0.1	-0.24	-0.16	-0.13	-0.27	-0.08	-0.17
CAGL0K01177g	-0.12	0.43	0.27	-0.36	0.34	0.12	-0.07	0.13
CAGL0J02750g	-0.11	0.15	0.21	-0.19	0.17	0.01	0.12	0.01
CAGL0L09471g	0.15	0.11	0.17	0.04	0.08	-0.05	0.19	-0.07
CAGL0B04807g	0	0.07	0.16	-0.09	0.06	-0.06	0.02	-0.04
CAGL0F06171g	0.08	-0.03	0.13	-0.05	0.06	0.05	0.1	0
CAGL0E05962g	0.09	-0.15	0.12	0.04	0.11	0.13	0.02	0.05
CAGL0D03300g	-0.17	0.07	0.09	-0.24	0.14	-0.07	0	0.01
CAGL0A03344g	0.29	-0.09	-0.02	0.1	-0.07	-0.11	-0.05	-0.06
CAGL0J00715g	0.18	-0.03	-0.02	0.05	0.24	0.08	0.09	0.18
CAGL0E05632g	0.09	0.17	0.15	0.21	0.47	0.03	0.23	0.18
[truncated: 3,094 more rows]

## Sheet: Legend
Supplementary table T5: Transcriptome comparisons of the wild type strain and a strain deleted for AFT2, grown in four different conditions. The values are log2 of the expression ratios. The values of two biologically independent replicates are given for each condition. Note that dyes have been swapped between the two replicates.
